# Supplementary material for: Community-wide plasmid gene mobilization and selection
Source: PubMed Central journal article supplement — ISME J. 2013 Feb 14;7(6):1173–86. doi: 10.1038/ismej.2013.13 (PMC3660673; doi:10.1038/ismej.2013.13), 2013-02-14
Supplement: ismej201313x1.pdf [file ismej201313x1.pdf]

Supplementary Information to

**Community-Wide Plasmid Gene Mobilization and Selection**

Vladimir Sentchilo<sup>1</sup>, Antonia P. Mayer<sup>1</sup>, Lionel Guy<sup>2</sup>, Ryo Miyazaki<sup>1</sup>, Susannah Green Tringe<sup>3</sup>, Kerrie Barry<sup>3</sup>, Stephanie Malfatti<sup>3</sup>, Alexander Goessmann<sup>4</sup>, Marc Robinson-Rechavi<sup>5</sup>, Jan Roelof van der Meer<sup>1</sup>

1 Department of Fundamental Microbiology, University of Lausanne, Biophore, Quartier UNIL-Sorge, 1015 Lausanne, Switzerland, vladimir.sentchilo@unil.ch, antonia.mayer@unil.ch, ryo.miyazaki@unil.ch, janroelof.vandermeer@unil.ch;

2 Molecular Evolution, BMC, Uppsala University, Husargatan 3, Box 596, 751 24 Uppsala, Sweden, lionel.guy@icm.uu.se

3 DOE Joint Genome Institute (JGI), 2800 Mitchell Drive, Bldg 400, Walnut Creek, CA 94596, USA, SGTringe@lbl.gov, KWBarry@lbl.gov, malfatti3@lbl.gov

4 Computational Genomics, CeBiTec/BRF, Universität Bielefeld, D-33594 Bielefeld, Germany, [agoesman@CeBiTec.Uni-Bielefeld.DE](mailto:agoesman@CeBiTec.Uni-Bielefeld.DE)

5 Department of Ecology and Evolution, University of Lausanne, Biophore, Quartier UNIL-Sorge, 1015 Lausanne, Switzerland, Marc.Robinson-Rechavi@unil.ch

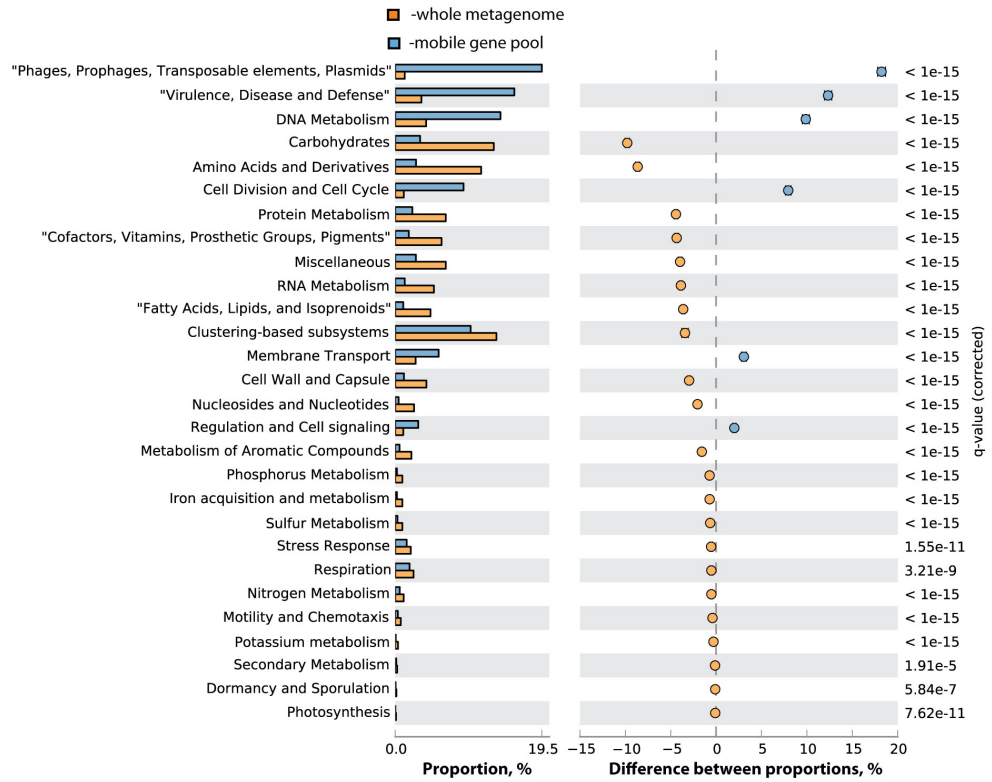

**Supplementary Figure 1. Over- and underrepresentation of functionally categorizable protein coding genes from the Morges WWTP 2007 plasmid metagenome compared to the North Carolina complete WWTP metagenome.** Diagram shows proportions within SEED level 1 subsystems and the difference between proportions in the two data sets. Whiskers denote calculated 95% confidence intervals.

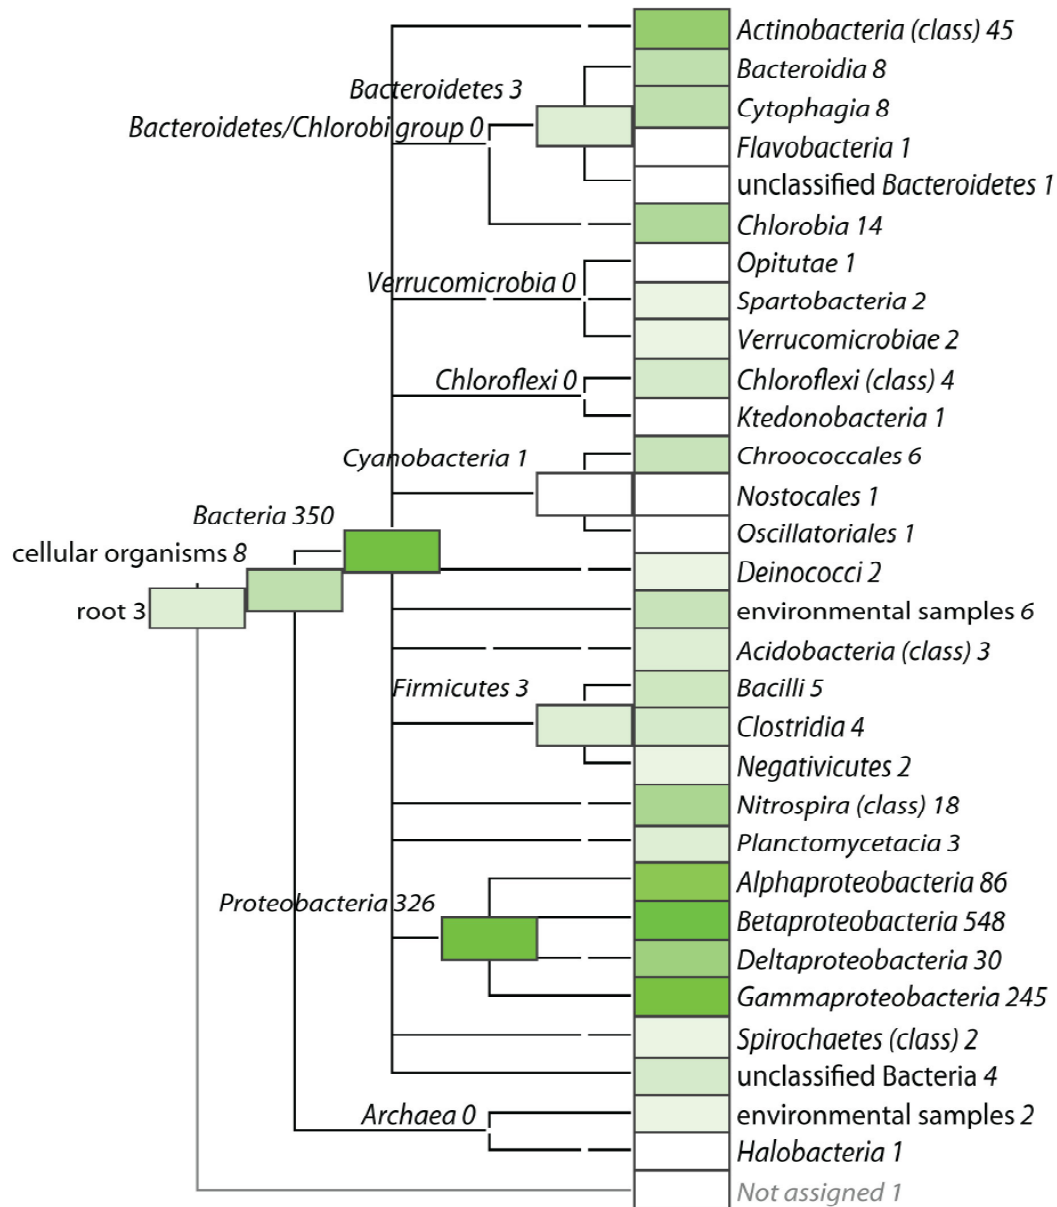

**Supplementary Figure 2. Phylogenetic inference of functionally predictable protein coding genes in the Morges WWTP plasmid metagenome.** Diagram shows phylogeny and number of hits within taxonomic category for protein coding genes predicted from the MIRA CONTIGS non-redundant 5x covered dataset, as derived by BLASTP queries against ‘All prokaryotic Proteins’ within the CAMERA environment. Note that numbering at nodes is not cumulative but based on the direct count of hits in the closest phylogenetic group. As an example, 326 hits fall in the level of *Proteobacteria*, but cannot be more precisely assigned to lower phylogenetic levels. 548 Hits fall in *Betaproteobacteria*, but are not counted again at the level of *Proteobacteria*.

### Supplementary Figure 3

**PCA analysis based on phylogenetic composition of mobile gene pools and selected whole microbial metagenomes representative for different environments.** Phylogenetic classifications were obtained by BLAT searches {Kent, 2002} against the SEED protein database in the MG-RAST environment using a maximum *e*-value of 1e-5. **a.** Principal components 1 versus 2. **b.** Principal components 1 versus 3. Environmental color code: yellow, wastewater treatment processes; red, plasmid gene pools; blue, salt-water; black, soil; orange, whale fall; brown, gut/fecal communities.

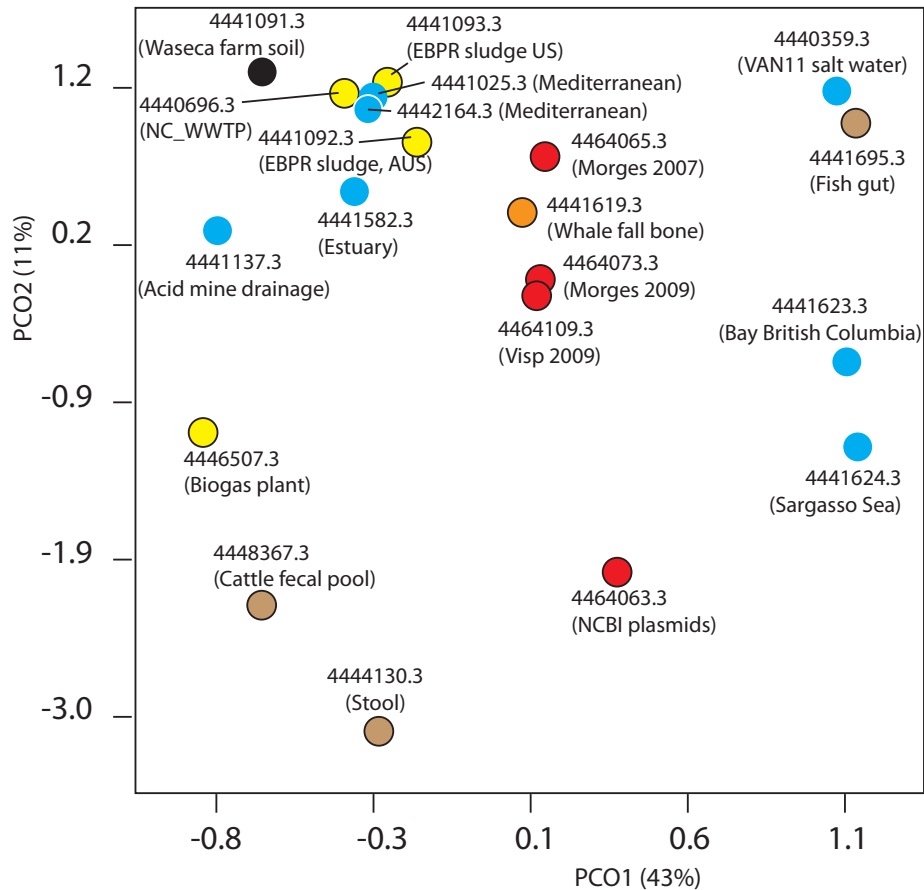

|           |                                              |           |                                                              |
|-----------|----------------------------------------------|-----------|--------------------------------------------------------------|
| 4464065.3 | Morges2007                                   | 4441137.3 | 5-Way (CG) acid mine drainage biofilm                        |
| 4464063.3 | NCBI 1878 plasmids                           | 4441619.3 | Whale Fall Bone                                              |
| 4464109.3 | Visp2009                                     | 4441623.3 | Bay of British Columbia                                      |
| 4440696.3 | NC_WWTP                                      | 4441582.3 | GS006 Shotgun - Estuary - Bay of Fundy, Nova Scotia - Canada |
| 4464073.3 | Morges2009                                   | 4441624.3 | Sargasso Sea                                                 |
| 4441025.3 | Mediterranean bathypelagic habitat           | 4444130.3 | Stool Metagenome                                             |
| 4442464.3 | Mediterranean bathypelagic habitat           | 4440359.3 | VAN11 salt water metagenome                                  |
| 4441091.3 | Waseca Farm soil                             | 4441695.3 | Fish—Healthy Gut bacteria                                    |
| 4441092.3 | Australian Phosphorus removing (EBPR) sludge | 4446507.3 | Biogas plant digestate                                       |
| 4441093.3 | US Phosphorus removing (EBPR) sludge         | 4448367.3 | Cattle fecal pool                                            |

**b. Principal components 1 versus 3. Environmental color code: yellow, wastewater treatment processes; red, plasmid gene pools; blue, salt-water; black, soil; orange, whale fall; brown, gut/fecal communities.**

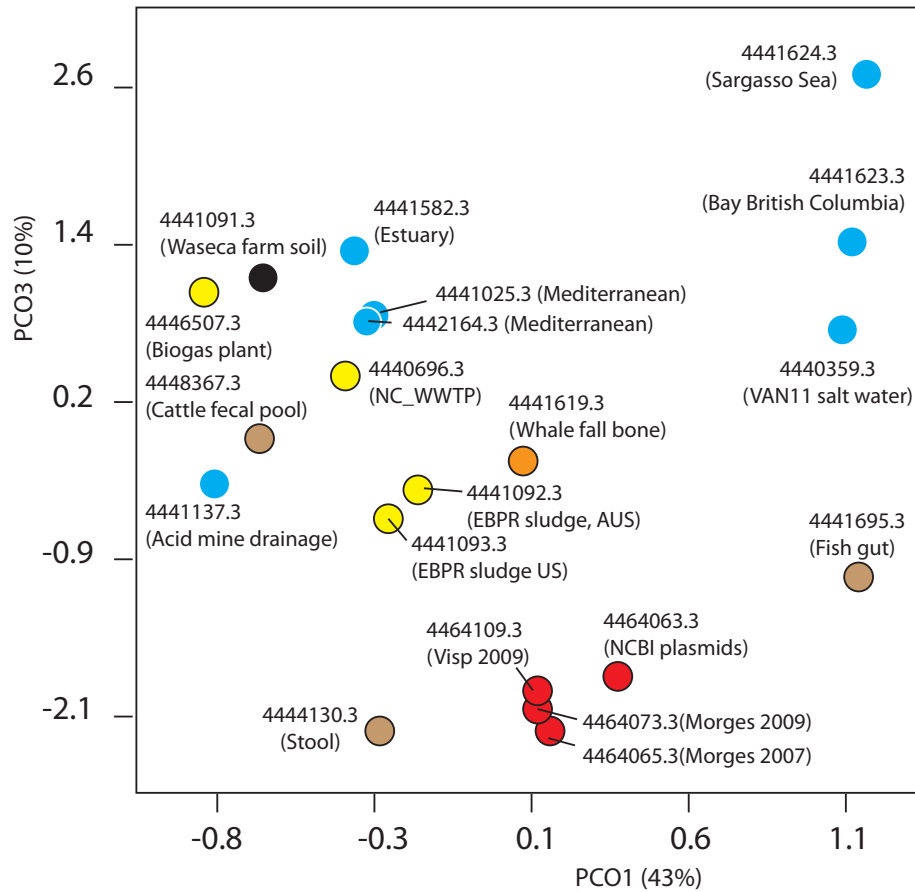

|           |                                              |           |                                                              |
|-----------|----------------------------------------------|-----------|--------------------------------------------------------------|
| 4464065.3 | Morges2007                                   | 4441137.3 | 5-Way (CG) acid mine drainage biofilm                        |
| 4464063.3 | NCBI 1878 plasmids                           | 4441619.3 | Whale Fall Bone                                              |
| 4464109.3 | Visp2009                                     | 4441623.3 | Bay of British Columbia                                      |
| 4440696.3 | NC_WWTP                                      | 4441582.3 | GS006 Shotgun - Estuary - Bay of Fundy, Nova Scotia - Canada |
| 4464073.3 | Morges2009                                   | 4441624.3 | Sargasso Sea                                                 |
| 4441025.3 | Mediterranean bathypelagic habitat           | 4444130.3 | Stool Metagenome                                             |
| 4442464.3 | Mediterranean bathypelagic habitat           | 4440359.3 | VAN11 salt water metagenome                                  |
| 4441091.3 | Waseca Farm soil                             | 4441695.3 | Fish—Healthy Gut bacteria                                    |
| 4441092.3 | Australian Phosphorus removing (EBPR) sludge | 4446507.3 | Biogas plant digestate                                       |
| 4441093.3 | US Phosphorus removing (EBPR) sludge         | 4448367.3 | Cattle fecal pool                                            |

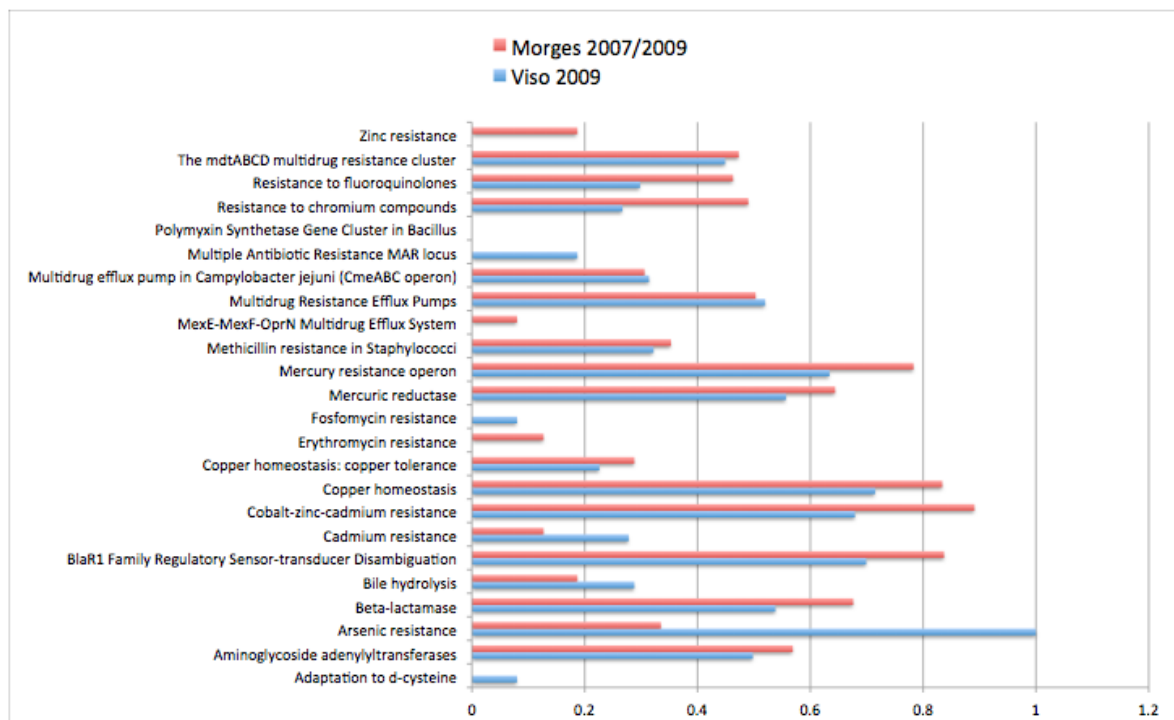

**Supplementary Figure 4. Proportions (% of all functionally assignable reads) of subcategories within the SEED classification ‘Resistance to antibiotics and toxic compounds’ for the combined Morges 2007/2009 versus Visp 2009 plasmid metagenomes.**

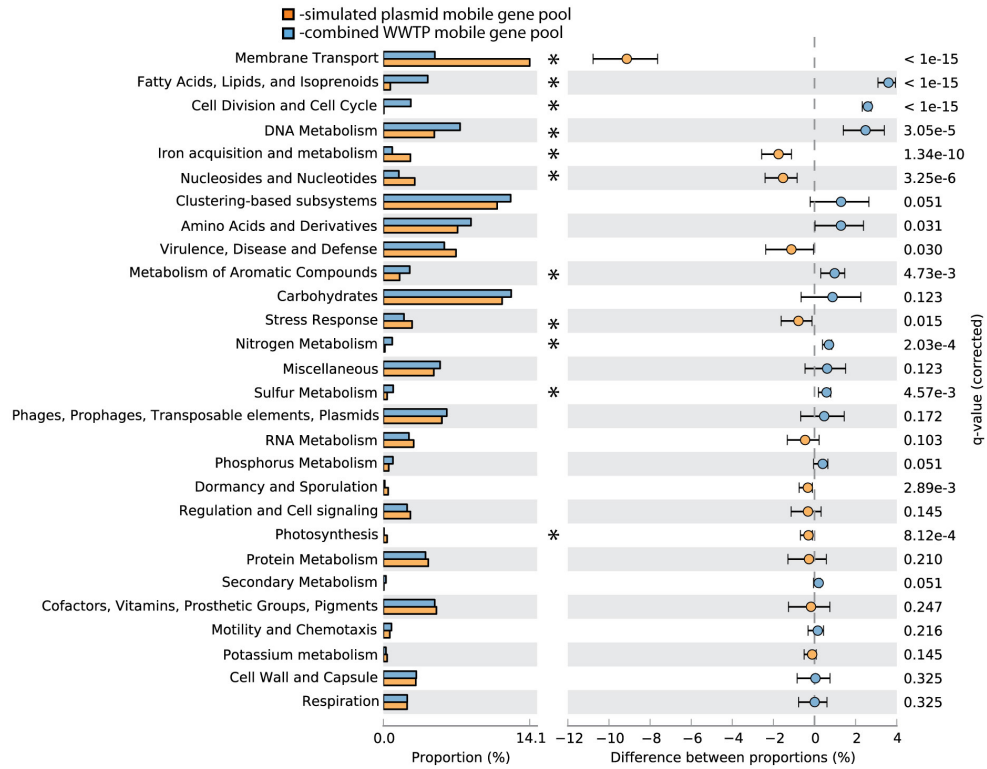

**Supplementary Figure 5. Over- and underrepresentation of functionally categorizable protein coding genes from the combined Morges2007/2009, Visp2009 plasmid metagenomes compared to an artificially combined set of 1000 plasmids from NCBI.** Diagram shows proportions within SEED level 1 subsystems and the difference between proportions in the two data sets. Whiskers denote calculated 95% confidence intervals. Asterisks mark categories with significant differences between the two data sets.

**Supplementary Table 1**

**Abundance of CCSD sequence matches to 16S rRNA genes and to genes for ribosomal proteins indicated little contaminating prokaryotic chromosomal DNA**

| Metagenome                                        | Number of reads | Genes for 16S rRNA |                           |
|---------------------------------------------------|-----------------|--------------------|---------------------------|
|                                                   |                 | Number of matches  | Matches per 100,000 reads |
| <b>CCS DNA Samples (unassembled reads)</b>        |                 |                    |                           |
| Morges07                                          | 71224           | 5                  | 7                         |
| Morges09                                          | 180048          | 103                | 57                        |
| Visp09                                            | 249017          | 11                 | 4                         |
|                                                   |                 |                    |                           |
| <b>Whole-WWTP metagenomes (unassembled reads)</b> |                 |                    |                           |
| WWTP NC                                           | 353747          | 168                | 47                        |
| Sludge/Australian, Phrap Assembly                 | 96563           | 40                 | 41                        |
| Sludge/US, Phrap Assembly                         | 127953          | 80                 | 63                        |

Presence of 16S rRNA genes in CCSD DNA samples in comparison to representative whole WWTP microbial community metagenomes according to MG-RAST annotation.



**Supplementary Table 2**

**Proportions of significant hits to known cluster of orthologous groups (COGs) or protein families (Pfam and TIGRfam) in CCS DNAs compared to full WWTP metagenomes.**

| Genome Name                                               | IMG/M<br>Taxon<br>Object ID | Proportion of (%)                      |         |     |      |             |
|-----------------------------------------------------------|-----------------------------|----------------------------------------|---------|-----|------|-------------|
|                                                           |                             | Genes with<br>functional<br>prediction | Enzymes | COG | Pfam | TIGR<br>fam |
| <b><i>CCS DNA (assembled DNA)</i></b>                     |                             |                                        |         |     |      |             |
| Morges07                                                  | 2013843001                  | 34                                     | 4       | 29  | 34   | 4           |
| Morges09                                                  | 2035918002                  | 38                                     | 12      | 34  | 31   | 3           |
| Visp09                                                    | 2035918001                  | 48                                     | 12      | 44  | 40   | 5           |
| MIRA contigs                                              | 2209111023                  | 37                                     | 3       | 29  | 32   | 4           |
|                                                           |                             |                                        |         |     |      |             |
| Plasmids IMG                                              | NA                          | 57                                     | 6       | 38  | 56   | 12          |
|                                                           |                             |                                        |         |     |      |             |
| <b><i>Whole-community metagenomes (assembled DNA)</i></b> |                             |                                        |         |     |      |             |
| Sludge/Australian<br>Phrap Assembly                       | 2000000001                  | 60                                     | 19      | 66  | 64   | 21          |
| Sludge/US, Phrap<br>Assembly                              | 2000000000                  | 61                                     | 22      | 66  | 63   | 20          |
| Sludge/US Virion<br>(fgenesb)                             | 2007300000                  | 39                                     | 11      | 37  | 36   | 9           |

**Supplementary Table S3.** Ranking of 291 microbial metagenomes available in IMG/M according to the percentage of genes with functional prediction.

| Genome Name                                                                                                                                                          | Taxon Obj ID | Phylum          | Class      | Order                                  | Family            | Genus             | Genes  | RANK | Genes with functional prediction, % | GC Perc | Bases     |
|----------------------------------------------------------------------------------------------------------------------------------------------------------------------|--------------|-----------------|------------|----------------------------------------|-------------------|-------------------|--------|------|-------------------------------------|---------|-----------|
| Aquatic microbial communities from Lake Kinneret (04)                                                                                                                | 2010483003   | Environmental   | Aquatic    | Freshwater                             | Lentic            | Limnetic zone     | 47     | 1    | 82.98                               | 0.48    | 42224     |
| Aquatic microbial communities from Lake Kinneret (05)                                                                                                                | 2010483004   | Environmental   | Aquatic    | Freshwater                             | Lentic            | Limnetic zone     | 41     | 2    | 82.93                               | 0.53    | 41093     |
| Aquatic microbial communities from Lake Kinneret (03)                                                                                                                | 2010483002   | Environmental   | Aquatic    | Freshwater                             | Lentic            | Limnetic zone     | 41     | 3    | 80.49                               | 0.53    | 42973     |
| Olavius algarvensis endosymbiont metagenome Gamma3                                                                                                                   | 2004178004   | Environmental   | Aquatic    | Marine                                 | Neritic zone      | Unclassified      | 4190   | 4    | 80.19                               | 0.56    | 4647793   |
| Marine Bacterioplankton communities from Antarctic, Sample 10335 (Summer fosmids)                                                                                    | 2040502005   | Environmental   | Aquatic    | Marine                                 | Neritic zone      | unclassified      | 1871   | 5    | 78.67                               | 0.4     | 1866435   |
| Sample 266                                                                                                                                                           | 2018540003   | Host-associated | Mammals    | Digestive system                       | Large intestine   | Fecal             | 42677  | 6    | 77.91                               | 0       | 0         |
| Aquatic microbial communities from Lake Kinneret (01)                                                                                                                | 2010483005   | Environmental   | Aquatic    | Freshwater                             | Lentic            | Limnetic zone     | 40     | 7    | 77.5                                | 0.63    | 40450     |
| Distal right leg ulcer DRU                                                                                                                                           | 2013505000   | Host-associated | Human      | Skin                                   | Medial distal leg | Venous leg ulcers | 4073   | 8    | 77.24                               | 0       | 0         |
| Venous leg ulcer VLU                                                                                                                                                 | 2013505001   | Host-associated | Human      | Skin                                   | Medial distal leg | Venous leg ulcers | 5344   | 9    | 75.69                               | 0       | 0         |
| Sample 267                                                                                                                                                           | 2018540002   | Host-associated | Mammals    | Digestive system                       | Large intestine   | Fecal             | 124684 | 10   | 75.23                               | 0       | 0         |
| Water microbial communities from Great Boiling Spring, Nevada, sample from Cellulolytic enrichment S 77C (Cellulolytic enrichment S 77C water)                       | 2149837005   | Environmental   | Aquatic    | Thermal springs                        | Unclassified      | Unclassified      | 264839 | 11   | 74.62                               | 0.49    | 213546803 |
| Marine Bacterioplankton communities from Antarctic, Sample 10334 (Winter fosmids)                                                                                    | 2040502004   | Environmental   | Aquatic    | Marine                                 | Neritic zone      | unclassified      | 2204   | 12   | 72.69                               | 0.35    | 1933492   |
| Sediment microbial communities from Great Boiling Spring, Nevada, sample from Cellulolytic enrichment S 77C (Cellulolytic enrichment S 77C sediment)                 | 2149837004   | Environmental   | Aquatic    | Thermal springs                        | Unclassified      | Unclassified      | 243539 | 13   | 72.16                               | 0.41    | 191954561 |
| Mountain Pine Beetle microbial communities from Grand Prairie, Alberta, sample from Hybrid pine (MPB hybrid beetle)                                                  | 2032320009   | Host-associated | Arthropoda | Symbiotic fungal gardens and galleries | unclassified      | Unclassified      | 42570  | 14   | 72                                  | 0.58    | 27077397  |
| Marine microbial communities from the Eastern Subtropical North Pacific Ocean, Expanding Oxygen minimum zones, sample from Line P sample_J_08_P26_500 (J_08_P26_500) | 2162886003   | Environmental   | Aquatic    | Marine                                 | Unclassified      | Unclassified      | 130568 | 15   | 70.79                               | 0.4     | 97610344  |
| Marine microbial communities from the Eastern Subtropical North Pacific Ocean, Expanding Oxygen minimum zones, sample from Line P                                    | 2156126013   | Environmental   | Aquatic    | Marine                                 | Unclassified      | Unclassified      | 95099  | 16   | 70.72                               | 0.45    | 63838176  |

Supplementary information

|                                                                                                                                                                                               |            |                 |             |                                        |                              |              |        |    |       |      |           |
|-----------------------------------------------------------------------------------------------------------------------------------------------------------------------------------------------|------------|-----------------|-------------|----------------------------------------|------------------------------|--------------|--------|----|-------|------|-----------|
| sample_A_09_P20_1000 (A_09_P20_1000)                                                                                                                                                          |            |                 |             |                                        |                              |              |        |    |       |      |           |
| Marine Bacterioplankton communities from Antarctic, sample from Winter (Winter fosmids Sept 2010 assemblies)                                                                                  | 2077657020 | Environmental   | Aquatic     | Marine                                 | Neritic zone                 | unclassified | 4343   | 17 | 70.69 | 0.39 | 3492552   |
| Olavius algarvensis endosymbiont metagenome Delta4                                                                                                                                            | 2004178002 | Environmental   | Aquatic     | Marine                                 | Neritic zone                 | Unclassified | 3038   | 18 | 70.08 | 0.55 | 6382161   |
| Uranium Contaminated Groundwater FW106                                                                                                                                                        | 2006543007 | Environmental   | Aquatic     | Freshwater                             | Groundwater                  | Contaminated | 12420  | 19 | 69.96 | 0.63 | 9554544   |
| Thermophilic enrichment culture SG0.5Z960 (454-Illumina assembly) (454-Illumina assembly)                                                                                                     | 2053563001 | Engineered      | Solid waste | Composting                             | Dissolved organics (aerobic) | Bioreactor   | 34856  | 20 | 69.69 | 0.65 | 29387211  |
| Marine microbial communities from the Eastern Subtropical North Pacific Ocean, Expanding Oxygen minimum zones, sample from Line P sample_A_09_P20_1000 (sample_A_09_P20_1000 June 2011 assem) | 2189573010 | Environmental   | Aquatic     | Marine                                 | Unclassified                 | Unclassified | 60903  | 21 | 69.5  | 0.45 | 40909548  |
| Marine microbial communities from the Eastern Subtropical North Pacific Ocean, Expanding Oxygen minimum zones, sample from Line P sample_J_09_P20_1000 (sample_J_09_P20_1000 June 2011 assem) | 2189573014 | Environmental   | Aquatic     | Marine                                 | Unclassified                 | Unclassified | 67353  | 22 | 68.95 | 0.47 | 46483313  |
| MPB hybrid gallery (MPB hybrid gallery)                                                                                                                                                       | 2029527007 | Host-associated | Arthropoda  | Symbiotic fungal gardens and galleries | Fungus gallery               | Unclassified | 53375  | 23 | 68.87 | 0.56 | 28121448  |
| Marine microbial communities from the Eastern Subtropical North Pacific Ocean, Expanding Oxygen minimum zones, sample from Line P sample_A_09_P04_1300 (A_09_P04_1300)                        | 2156126010 | Environmental   | Aquatic     | Marine                                 | Unclassified                 | Unclassified | 149723 | 24 | 68.76 | 0.4  | 114098395 |
| Marine microbial communities from the Eastern Subtropical North Pacific Ocean, Expanding Oxygen minimum zones, sample from Line P sample_A_09_P04_500 (sample_A_09_P04_500 June 2011 assem)   | 2189573006 | Environmental   | Aquatic     | Marine                                 | Unclassified                 | Unclassified | 49811  | 25 | 68.58 | 0.44 | 32242365  |
| Mouse Gut Community lean3                                                                                                                                                                     | 2004230000 | Host-associated | Mammals     | Digestive system                       | Large intestine              | Fecal        | 2793   | 26 | 68.56 | 0.5  | 2143888   |
| Mouse Gut Community lean1                                                                                                                                                                     | 2004230001 | Host-associated | Mammals     | Digestive system                       | Large intestine              | Fecal        | 2935   | 27 | 68.48 | 0.51 | 2234664   |
| Soil microbial community from bioreactor at Alameda Naval Air Station, CA, contaminated with Chloroethene, Sample 196 (Jan 2009 assem)                                                        | 2199034002 | Environmental   | Terrestrial | Soil                                   | Loam                         | Contaminated | 43183  | 28 | 68.39 | 0.52 | 30615378  |
| Marine microbial communities from the Eastern Subtropical North Pacific Ocean, Expanding Oxygen minimum zones, sample from Line P sample_A_09_P04_500 (A_09_P04_500)                          | 2156126011 | Environmental   | Aquatic     | Marine                                 | Unclassified                 | Unclassified | 63817  | 29 | 68.17 | 0.42 | 43645559  |
| Marine microbial communities from the Eastern Subtropical North Pacific Ocean, Expanding Oxygen minimum zones, sample from Line P                                                             | 2189573012 | Environmental   | Aquatic     | Marine                                 | Unclassified                 | Unclassified | 60574  | 30 | 68.12 | 0.42 | 40827388  |

Supplementary information

|                                                                                                                                                                                             |            |                 |             |                                        |                              |               |        |    |       |      |          |
|---------------------------------------------------------------------------------------------------------------------------------------------------------------------------------------------|------------|-----------------|-------------|----------------------------------------|------------------------------|---------------|--------|----|-------|------|----------|
| sample_J_08_P26_500 (sample_J_08_P26_500 June 2011 assem)                                                                                                                                   |            |                 |             |                                        |                              |               |        |    |       |      |          |
| Thermophilic enrichment culture SG0.5JP960 (454-Illumina assembly) - version 2 (454-Illumina assembly v2)                                                                                   | 2061766001 | Engineered      | Solid waste | Composting                             | Dissolved organics (aerobic) | Bioreactor    | 64668  | 31 | 68.12 | 0.64 | 49664259 |
| Marine microbial communities from the Eastern Subtropical North Pacific Ocean, Expanding Oxygen minimum zones, sample from Line P sample_J_09_P20_500 (sample_J_09_P20_500 June 2011 assem) | 2189573013 | Environmental   | Aquatic     | Marine                                 | Unclassified                 | Unclassified  | 54923  | 32 | 68.04 | 0.46 | 36978437 |
| Dendroctonus ponderosae beetle community (MPB hybrid beetle) (Lodgepole pine)                                                                                                               | 2032320008 | Host-associated | Arthropoda  | Symbiotic fungal gardens and galleries | Fungus gallery               | Unclassified  | 66368  | 33 | 68.03 | 0.57 | 29279222 |
| Fungus garden combined (combined)                                                                                                                                                           | 2035918000 | Host-associated | Arthropoda  | Symbiotic fungal gardens and galleries | Fungus garden                | unclassified  | 114620 | 34 | 68.03 | 0.53 | 61239920 |
| Mouse Gut Community ob2                                                                                                                                                                     | 2004230002 | Host-associated | Mammals     | Digestive system                       | Large intestine              | Fecal         | 2331   | 35 | 67.7  | 0.5  | 1841347  |
| Hindgut microbiome of Nasutitermes sp. (Costa Rica), fosmids                                                                                                                                | 2004175000 | Host-associated | Arthropoda  | Digestive system                       | Hindgut                      | unclassified  | 450    | 36 | 67.56 | 0.43 | 459633   |
| Aquatic microbial communities from Lake Kinneret (02)                                                                                                                                       | 2010483006 | Environmental   | Aquatic     | Freshwater                             | Lentic                       | Limnetic zone | 46     | 37 | 67.39 | 0.42 | 38140    |
| Marine microbial communities from the Eastern Subtropical North Pacific Ocean, Expanding Oxygen minimum zones, sample from Line P sample_A_09_P04_1300 (A_09_P04_1300 June 2011 assembly)   | 2166559025 | Environmental   | Aquatic     | Marine                                 | Unclassified                 | Unclassified  | 80550  | 38 | 66.98 | 0.41 | 56542842 |
| Permafrost field sample                                                                                                                                                                     | 2067725009 | Environmental   | Terrestrial | Soil                                   | Unclassified                 | unclassified  | 13277  | 39 | 66.9  | 0.54 | 9656814  |
| Marine microbial communities from the Eastern Subtropical North Pacific Ocean, Expanding Oxygen minimum zones, sample from Line P sample_A_09_P04_1000 (A_09_P04_1000 June 2011 assem)      | 2189573007 | Environmental   | Aquatic     | Marine                                 | Unclassified                 | Unclassified  | 26183  | 40 | 66.78 | 0.35 | 17032716 |
| Poplar biomass bioreactor microbial communities from Brookhaven National Lab, NY, sample from pooled GH fosmids                                                                             | 2020627002 | Engineered      | Solid waste | Composting                             | unclassified                 | Bioreactor    | 1485   | 41 | 66.6  | 0.52 | 1801402  |
| Fungus garden microbial communities from Atta colombica in Panama, sample from fungus garden bottom (Fungus garden bottom)                                                                  | 2029527006 | Host-associated | Arthropoda  | Symbiotic fungal gardens and galleries | Fungus garden                | unclassified  | 199573 | 42 | 66.5  | 0.55 | 83167033 |
| Combined                                                                                                                                                                                    | 2029527003 | Host-associated | Arthropoda  | Symbiotic fungal gardens and galleries | Fungus garden                | unclassified  | 220873 | 43 | 66.11 | 0.57 | 97571324 |
| Mountain Pine Beetle microbial communities from                                                                                                                                             | 2035918003 | Host-associated | Arthropoda  | Symbiotic                              | unclassified                 | Unclassified  | 87336  | 44 | 66.01 | 0.57 | 58839471 |

Supplementary information

|                                                                                                                                                                                             |            |                 |             |                                        |                 |              |        |    |       |      |           |
|---------------------------------------------------------------------------------------------------------------------------------------------------------------------------------------------|------------|-----------------|-------------|----------------------------------------|-----------------|--------------|--------|----|-------|------|-----------|
| McBride, British Columbia, Canada, sample from Lodgepole pine (Lodgepole pine)                                                                                                              |            |                 |             | fungal gardens and galleries           |                 |              |        |    |       |      |           |
| Mouse Gut Community lean2                                                                                                                                                                   | 2004230004 | Host-associated | Mammals     | Digestive system                       | Large intestine | Fecal        | 2782   | 45 | 65.82 | 0.52 | 2133081   |
| Methylotrophic community from Lake Washington sediment Methylamine enrichment                                                                                                               | 2006207002 | Environmental   | Aquatic     | Freshwater                             | Lentic          | Sediment     | 54783  | 46 | 65.75 | 0.53 | 37225208  |
| Cyphomyrmex longiscapus fungus garden                                                                                                                                                       | 2030936005 | Host-associated | Arthropoda  | Symbiotic fungal gardens and galleries | Fungus garden   | unclassified | 190674 | 47 | 65.58 | 0.56 | 88331577  |
| Mouse Gut Community ob1                                                                                                                                                                     | 2004230003 | Host-associated | Mammals     | Digestive system                       | Large intestine | Fecal        | 3051   | 48 | 65.49 | 0.46 | 2359017   |
| Fungus garden microbial communities from Atta colombica in Panama, sample from fungus garden top                                                                                            | 2029527005 | Host-associated | Arthropoda  | Symbiotic fungal gardens and galleries | Fungus garden   | unclassified | 241664 | 49 | 64.78 | 0.54 | 100904834 |
| Atta cephalotes fungus garden (ACEF)                                                                                                                                                        | 2029527004 | Host-associated | Arthropoda  | Symbiotic fungal gardens and galleries | Fungus garden   | Unclassified | 74196  | 50 | 64.17 | 0.51 | 40623338  |
| Marine microbial communities from the Eastern Subtropical North Pacific Ocean, Expanding Oxygen minimum zones, sample from Line P sample_A_09_P20_500 (sample_A_09_P20_500 June 2011 assem) | 2189573011 | Environmental   | Aquatic     | Marine                                 | Unclassified    | Unclassified | 62815  | 51 | 64.04 | 0.4  | 41083481  |
| Human Gut Community Subject 7                                                                                                                                                               | 2004002000 | Host-associated | Human       | Digestive system                       | Large intestine | Fecal        | 20956  | 52 | 63.68 | 0.49 | 15817685  |
| Methylotrophic community from Lake Washington sediment Formate enrichment                                                                                                                   | 2006207004 | Environmental   | Aquatic     | Freshwater                             | Lentic          | Sediment     | 28834  | 53 | 63.67 | 0.66 | 17570569  |
| Fungus garden microbial community from termites in South Africa, sample from Oerleman's Farm                                                                                                | 2065487014 | Host-associated | Arthropoda  | Symbiotic fungal gardens and galleries | Fungus garden   | unclassified | 23108  | 54 | 63.65 | 0.49 | 16028606  |
| Trachymyrmex fungus garden                                                                                                                                                                  | 2084038018 | Host-associated | Arthropoda  | Symbiotic fungal gardens and galleries | Fungus garden   | Unclassified | 200369 | 55 | 63.63 | 0.54 | 79020976  |
| TA reactor DNA contigs from 4 sample (Terephthalate degrading reactor metagenome contigs from 4 samples)                                                                                    | 2081372008 | Engineered      | Wastewater  | Industrial wastewater                  | Unclassified    | Unclassified | 50543  | 56 | 63.5  | 0.48 | 35830898  |
| Marine microbial communities from the Eastern Subtropical North Pacific Ocean, Expanding Oxygen minimum zones, sample from Line P sample_F_10_SI03_135 (F_10_SI03_135)                      | 2162886005 | Environmental   | Aquatic     | Marine                                 | Unclassified    | Unclassified | 677498 | 57 | 63.35 | 0.43 | 541536081 |
| Soil microbial community from bioreactor at Alameda Naval Air Station, CA, contaminated with                                                                                                | 2014730001 | Environmental   | Terrestrial | Soil                                   | Loam            | Contaminated | 61557  | 58 | 63.1  | 0.52 | 41065977  |

Supplementary information

|                                                                                                                                                                                               |            |                 |                   |                                               |                               |                 |        |    |       |      |           |
|-----------------------------------------------------------------------------------------------------------------------------------------------------------------------------------------------|------------|-----------------|-------------------|-----------------------------------------------|-------------------------------|-----------------|--------|----|-------|------|-----------|
| Chloroethene, Sample 196                                                                                                                                                                      |            |                 |                   |                                               |                               |                 |        |    |       |      |           |
| Human Gut Community Subject 8                                                                                                                                                                 | 2004002001 | Host-associated | Human             | Digestive system                              | Large intestine               | Fecal           | 26422  | 59 | 63.05 | 0.43 | 20486813  |
| Marine microbial communities from the Eastern Subtropical North Pacific Ocean, Expanding Oxygen minimum zones, sample from Line P sample_F_10_SI03_150 (sample_F_10_SI03_150 June 2011 assem) | 2189573019 | Environmental   | Aquatic           | Marine                                        | Unclassified                  | Unclassified    | 171988 | 60 | 62.75 | 0.44 | 126645598 |
| Aquatic microbial communities from Lake Kinneret (07)                                                                                                                                         | 2010483007 | Environmental   | Aquatic           | Freshwater                                    | Lentic                        | Limnetic zone   | 32     | 61 | 62.5  | 0.61 | 35861     |
| Sample 10205 (Test dataset. NOT FOR LOADING!)                                                                                                                                                 | 2005137002 | Engineered      | Modeled           | Simulated communities (sequence read mixture) | Sanger                        | Sanger          | 107218 | 62 | 62.25 | 0.57 | 81534405  |
| Marine microbial communities from the Eastern Subtropical North Pacific Ocean, Expanding Oxygen minimum zones, sample from Line P sample_F_10_SI03_135 (sample_F_10_SI03_135 June 2011 assem) | 2189573018 | Environmental   | Aquatic           | Marine                                        | Unclassified                  | Unclassified    | 178218 | 63 | 62.06 | 0.44 | 127666036 |
| DNA Fragments from Six Antarctic Marine                                                                                                                                                       | 2012990003 | Environmental   | Aquatic           | Marine                                        | Unclassified                  | Uncharacterized | 39     | 64 | 61.54 | 0.5  | 43087     |
| Marine microbial communities from the Eastern Subtropical North Pacific Ocean, Expanding Oxygen minimum zones, sample from Line P sample_F_10_SI03_200 (sample_F_10_SI03_200 June 2011 assem) | 2189573008 | Environmental   | Aquatic           | Marine                                        | Unclassified                  | Unclassified    | 175334 | 65 | 61.32 | 0.41 | 131833497 |
| Macropus eugenii forestomach microbiome from Canberra, Australia, sample 10206                                                                                                                | 2021593001 | Host-associated | Mammals           | Digestive system                              | Stomach                       | unclassified    | 2153   | 66 | 61.31 | 0.46 | 2471295   |
| Switchgrass rhizosphere microbial community from Michigan, US, sample from East Lansing bulk soil (Bulk soil GOTP January 2011 combined assembly)                                             | 2124908023 | Host-associated | Plants            | Rhizoplane                                    | Epiphytes                     | unclassified    | 44286  | 67 | 61.19 | 0.58 | 28451840  |
| Hot spring microbial community from Yellowstone Hot Springs, sample from Calcite Springs, Tower Falls Region                                                                                  | 2014031005 | Environmental   | Aquatic           | Thermal springs                               | Hot (42-90C)                  | unclassified    | 23361  | 68 | 60.9  | 0.42 | 16071904  |
| Mixed alcohol bioreactor microbial communities from Texas A&M University, sample 40C (40 degree reactor)                                                                                      | 2049941001 | Engineered      | Biotransformation | Mixed alcohol bioreactor                      | Unclassified                  | Unclassified    | 296298 | 69 | 60.74 | 0.45 | 108660417 |
| Switchgrass rhizosphere microbial community from Michigan, US, sample from Buena Vista Grasslands Wildlife Area, Rhizosphere BV2.1 (BV2.1 January 2011 combined assembly)                     | 2124908019 | Host-associated | Plants            | Rhizoplane                                    | Epiphytes                     | unclassified    | 5300   | 70 | 60.74 | 0.39 | 2825076   |
| Sludge/US, Phrap Assembly                                                                                                                                                                     | 2000000000 | Engineered      | Wastewater        | Nutrient removal                              | Biological phosphorus removal | Bioreactor      | 34656  | 71 | 60.7  | 0.6  | 56608360  |
| Sample 10205 (Test dataset. NOT FOR LOADING!)                                                                                                                                                 | 2005137001 | Engineered      | Modeled           | Simulated communities (sequence read mixture) | Sanger                        | Sanger          | 94595  | 72 | 60.55 | 0.56 | 70870120  |

Supplementary information

|                                                                                                                                                                                             |            |                 |            |                                               |                               |              |        |    |       |      |           |
|---------------------------------------------------------------------------------------------------------------------------------------------------------------------------------------------|------------|-----------------|------------|-----------------------------------------------|-------------------------------|--------------|--------|----|-------|------|-----------|
| Bath Hot Springs, planktonic community                                                                                                                                                      | 2007309001 | Environmental   | Aquatic    | Non-marine Saline and Alkaline                | Near-boiling (>90C)           | Alkaline     | 29804  | 73 | 60.43 | 0.53 | 20451936  |
| Marine microbial communities from the Eastern Subtropical North Pacific Ocean, Expanding Oxygen minimum zones, sample from Line P sample F_10_S103_10 (F_10_S103_10)                        | 2156126009 | Environmental   | Aquatic    | Marine                                        | Unclassified                  | Unclassified | 339566 | 74 | 60.43 | 0.41 | 263651981 |
| Hot spring microbial community from Yellowstone Hot Springs, sample from Bechler Spring                                                                                                     | 2013515002 | Environmental   | Aquatic    | Thermal springs                               | Hot (42-90C)                  | unclassified | 27144  | 75 | 60.16 | 0.47 | 18087467  |
| Marine microbial communities from the Eastern Subtropical North Pacific Ocean, Expanding Oxygen minimum zones, sample from Line P sample F_10_S103_10 (sample_F_10_S103_10 June 2011 assem) | 2189573015 | Environmental   | Aquatic    | Marine                                        | Unclassified                  | Unclassified | 140093 | 76 | 60    | 0.42 | 97292779  |
| Dump top (Dump top)                                                                                                                                                                         | 2030936006 | Host-associated | Arthropoda | Symbiotic fungal gardens and galleries        | Fungus garden                 | Garden dump  | 422825 | 77 | 59.97 | 0.59 | 160827138 |
| Sample 10205 (Test dataset. NOT FOR LOADING!)                                                                                                                                               | 2005137000 | Engineered      | Modeled    | Simulated communities (sequence read mixture) | Sanger                        | Sanger       | 150417 | 78 | 59.94 | 0.55 | 110456036 |
| Xyleborus affinis microbiome from Bern, Switzerland, sample of gallery community (Gallery community)                                                                                        | 2084038008 | Host-associated | Arthropoda | Symbiotic fungal gardens and galleries        | Fungus gallery                | Unclassified | 364117 | 79 | 59.86 | 0.58 | 146840147 |
| 1_050719N                                                                                                                                                                                   | 2009439003 | Environmental   | Aquatic    | Thermal springs                               | Hot (42-90C)                  | Acidic       | 40864  | 80 | 59.81 | 0.49 | 26884788  |
| Sludge/Australian, Phrap Assembly                                                                                                                                                           | 2000000001 | Engineered      | Wastewater | Nutrient removal                              | Biological phosphorus removal | Bioreactor   | 30672  | 81 | 59.63 | 0.55 | 53048954  |
| Dendroctonus frontalis Fungal community                                                                                                                                                     | 2044078007 | Host-associated | Arthropoda | Symbiotic fungal gardens and galleries        | Fungus gallery                | Unclassified | 130832 | 82 | 59.58 | 0.59 | 72612852  |
| Hot spring microbial community from Yellowstone Hot Springs, sample from Obisidian Pool Prime                                                                                               | 2016842005 | Environmental   | Aquatic    | Thermal springs                               | Hot (42-90C)                  | unclassified | 38984  | 83 | 59.2  | 0.45 | 24421805  |
| Sludge/US, Jazz Assembly                                                                                                                                                                    | 2001000000 | Engineered      | Wastewater | Nutrient removal                              | Biological phosphorus removal | Bioreactor   | 16995  | 84 | 59.14 | 0.6  | 41128538  |
| Freshwater-Acetate Anammox bacterial enrichment: gDNA_1                                                                                                                                     | 2030936003 | Engineered      | Wastewater | Nutrient removal                              | Nitrogen removal              | Anammox      | 77567  | 85 | 58.65 | 0.58 | 41954873  |
| Olavius algarvensis endosymbiont metagenome Gamma1                                                                                                                                          | 2004178003 | Environmental   | Aquatic    | Marine                                        | Neritic zone                  | Unclassified | 1893   | 86 | 58.64 | 0.58 | 5317000   |
| 3_050719R                                                                                                                                                                                   | 2010170001 | Environmental   | Aquatic    | Thermal springs                               | Hot (42-90C)                  | Acidic       | 43764  | 87 | 58.6  | 0.59 | 28728092  |
| 5_050719P                                                                                                                                                                                   | 2010170003 | Environmental   | Aquatic    | Thermal                                       | Hot (42-90C)                  | Acidic       | 74755  | 88 | 58.58 | 0.58 | 50211307  |

Supplementary information

|                                                                                                                                                                |            |                 |                   |                                     |                         |                 |        |     |       |      |           |
|----------------------------------------------------------------------------------------------------------------------------------------------------------------|------------|-----------------|-------------------|-------------------------------------|-------------------------|-----------------|--------|-----|-------|------|-----------|
|                                                                                                                                                                |            |                 |                   | springs                             |                         |                 |        |     |       |      |           |
| Bath Hot Springs, filamentous community                                                                                                                        | 2007309000 | Environmental   | Aquatic           | Non-marine Saline and Alkaline      | Near-boiling (>90C)     | Alkaline        | 14864  | 89  | 58.56 | 0.5  | 10490501  |
| Marine microbial communities from Deepwater Horizon Oil Spill, sample BP Oil Spill BM58: eDNA_1 (BM58 Illumina assembly)                                       | 2088090017 | Environmental   | Aquatic           | Marine                              | Unclassified            | Uncharacterized | 41802  | 90  | 58.14 | 0.41 | 25346668  |
| 4_050719Q                                                                                                                                                      | 2010170002 | Environmental   | Aquatic           | Thermal springs                     | Hot (42-90C)            | Acidic          | 84577  | 91  | 58.05 | 0.57 | 58029430  |
| Sample 10166                                                                                                                                                   | 2013843002 | Engineered      | Bioremediation    | Tetrachloroethylene and derivatives | Chloroethene            | Bioreactor      | 41114  | 92  | 57.76 | 0.51 | 29947996  |
| Guerrero Negro salt ponds hypersaline mat 01(G)                                                                                                                | 2004247000 | Environmental   | Aquatic           | Non-marine Saline and Alkaline      | Salt crystallizer ponds | Microbial mats  | 13353  | 93  | 57.73 | 0.55 | 8596350   |
| Hot spring microbial community from Yellowstone Hot Springs, sample from Chocolate Pots                                                                        | 2014031006 | Environmental   | Aquatic           | Thermal springs                     | Hot (42-90C)            | unclassified    | 43924  | 94  | 57.49 | 0.5  | 31857986  |
| Methylotrophic community from Lake Washington sediment combined (v2)                                                                                           | 2006543005 | Environmental   | Aquatic           | Freshwater                          | Lentic                  | Sediment        | 323777 | 95  | 57.41 | 0.58 | 211470570 |
| Hot spring microbial community from Yellowstone Hot Springs, sample from Alice Springs, Crater Hills                                                           | 2014031002 | Environmental   | Aquatic           | Thermal springs                     | Hot (42-90C)            | unclassified    | 13862  | 96  | 57.29 | 0.41 | 9888965   |
| sept.09                                                                                                                                                        | 2020627003 | Engineered      | Bioremediation    | Hydrocarbon                         | Benzene                 | Bioreactor      | 52548  | 97  | 57.15 | 0.5  | 33465768  |
| Mixed alcohol bioreactor microbial communities from Texas A&M University, sample 55C (55 degree reactor, August 2010 assembly)                                 | 2077657005 | Engineered      | Biotransformation | Mixed alcohol bioreactor            | Unclassified            | Unclassified    | 154456 | 98  | 57.11 | 0.45 | 73615066  |
| Freshwater microbial communities from Lake Mendota, WI, sample from Practice 29OCT2010 epilimnion (Lake Mendota Practice 29OCT2010 epilimnion June 2011 assem) | 2199352005 | Environmental   | Aquatic           | Freshwater                          | Lentic                  | Unclassified    | 157669 | 99  | 57.1  | 0.4  | 63922670  |
| Methylotrophic community from Lake Washington sediment Methane enrichment                                                                                      | 2006207000 | Environmental   | Aquatic           | Freshwater                          | Lentic                  | Sediment        | 81582  | 100 | 56.98 | 0.59 | 52164993  |
| Saline water microbial communities from Great Salt Lake, Utah, sample from South Arm Stromatolite (South Arm Stromatolite)                                     | 2058419002 | Environmental   | Aquatic           | Non-marine Saline and Alkaline      | Saline                  | unclassified    | 41679  | 101 | 56.89 | 0.47 | 14174075  |
| Fossil microbial community from Whale Fall at Santa Cruz Basin of the Pacific Ocean Sample #1                                                                  | 2001200002 | Environmental   | Aquatic           | Marine                              | Fossil                  | Whale fall      | 41932  | 102 | 56.73 | 0.44 | 31805936  |
| Hot spring microbial community from Yellowstone Hot Springs, sample from Washburn Springs #1                                                                   | 2016842004 | Environmental   | Aquatic           | Thermal springs                     | Hot (42-90C)            | unclassified    | 62242  | 103 | 56.6  | 0.46 | 38709330  |
| Poplar biomass bioreactor microbial communities from Brookhaven National Lab, NY sample from anaerobic community                                               | 2010388001 | Engineered      | Solid waste       | Composting                          | unclassified            | Bioreactor      | 20947  | 104 | 56.49 | 0.51 | 11096014  |
| Hot spring microbial community from Yellowstone Hot Springs, sample from Mushroom Spring                                                                       | 2015219002 | Environmental   | Aquatic           | Thermal springs                     | Hot (42-90C)            | unclassified    | 76046  | 105 | 56.46 | 0.53 | 45311652  |
| Bacterial community                                                                                                                                            | 2044078006 | Host-associated | Arthropoda        | Symbiotic fungal gardens and        | unclassified            | Unclassified    | 82571  | 106 | 56.42 | 0.6  | 41255331  |



Supplementary information

|                                                                                                                                                                                           |            |                 |            |                                        |               |               |        |     |       |      |           |
|-------------------------------------------------------------------------------------------------------------------------------------------------------------------------------------------|------------|-----------------|------------|----------------------------------------|---------------|---------------|--------|-----|-------|------|-----------|
|                                                                                                                                                                                           |            |                 |            | galleries                              |               |               |        |     |       |      |           |
| Hindgut microbiome of Nasutitermes sp. (Costa Rica)                                                                                                                                       | 2004080001 | Host-associated | Arthropoda | Digestive system                       | Hindgut       | unclassified  | 83320  | 107 | 56.32 | 0.48 | 61533145  |
| Sample 10594                                                                                                                                                                              | 2010170004 | Environmental   | Aquatic    | Thermal springs                        | Hot (42-90C)  | unclassified  | 6949   | 108 | 56.2  | 0.55 | 4270923   |
| Dump bottom (Dump bottom)                                                                                                                                                                 | 2032320007 | Host-associated | Arthropoda | Symbiotic fungal gardens and galleries | Fungus garden | Garden dump   | 525993 | 109 | 56.13 | 0.62 | 196100111 |
| Hot spring microbial community from Yellowstone Hot Springs, sample from Dragon Spring, Norris Geyser Basin                                                                               | 2014031004 | Environmental   | Aquatic    | Thermal springs                        | Hot (42-90C)  | unclassified  | 27467  | 110 | 56.13 | 0.39 | 18602353  |
| Hot spring microbial community from Yellowstone Hot Springs, sample from Nymph Lake 10 454-Titanium                                                                                       | 2015219001 | Environmental   | Aquatic    | Thermal springs                        | Hot (42-90C)  | unclassified  | 10385  | 111 | 56.1  | 0.49 | 5509727   |
| Air microbial communities Singapore indoor air filters 2                                                                                                                                  | 2003000007 | Environmental   | Air        | Indoor Air                             | unclassified  | Unclassified  | 45666  | 112 | 56    | 0.63 | 40148915  |
| Marine microbial communities from the Eastern Subtropical North Pacific Ocean, Expanding Oxygen minimum zones, sample from Line P sample_A_09_P04_10 (sample_A_09_P04_10 June 2011 assem) | 2189573009 | Environmental   | Aquatic    | Marine                                 | Unclassified  | Unclassified  | 125307 | 113 | 55.95 | 0.4  | 82925362  |
| Ultra Back A BS                                                                                                                                                                           | 2001200000 | Environmental   | Aquatic    | Freshwater                             | Groundwater   | Mine drainage | 12820  | 114 | 55.94 | 0.46 | 10830886  |
| Hot spring microbial community from Yellowstone Hot Springs, sample from Narrow Gauge - 454-Titanium                                                                                      | 2015391001 | Environmental   | Aquatic    | Thermal springs                        | Hot (42-90C)  | unclassified  | 3891   | 115 | 55.92 | 0.32 | 2923224   |
| Lake Itasca #1 (Itasca #1)                                                                                                                                                                | 2077657006 | Environmental   | Aquatic    | Freshwater                             | Lotic         | Unclassified  | 628    | 116 | 55.89 | 0.52 | 222168    |
| Hot spring microbial community from Yellowstone Hot Springs, sample from Bath Lake Vista Annex                                                                                            | 2013954000 | Environmental   | Aquatic    | Thermal springs                        | Hot (42-90C)  | unclassified  | 51823  | 117 | 55.86 | 0.49 | 35743505  |
| Methylophilic community from Lake Washington sediment Methanol enrichment                                                                                                                 | 2006207001 | Environmental   | Aquatic    | Freshwater                             | Lentic        | Sediment      | 77750  | 118 | 55.8  | 0.59 | 50245961  |
| 2_050719S                                                                                                                                                                                 | 2009439000 | Environmental   | Aquatic    | Thermal springs                        | Hot (42-90C)  | Acidic        | 51132  | 119 | 55.56 | 0.51 | 31802272  |
| Sample 10201                                                                                                                                                                              | 2017108002 | Environmental   | Aquatic    | Marine                                 | Oceanic       | Sediment      | 22586  | 120 | 55.49 | 0.44 | 20878222  |
| Minneapolis Minnesota #1 (Minneapolis #1)                                                                                                                                                 | 2077657007 | Environmental   | Aquatic    | Freshwater                             | Lotic         | Unclassified  | 595    | 121 | 55.46 | 0.52 | 212691    |
| Fungus-growing Termite worker microbial community from South Africa, sample from Oerleman's Farm                                                                                          | 2065487013 | Host-associated | Arthropoda | Digestive system                       | Hindgut       | unclassified  | 359783 | 122 | 55.41 | 0.55 | 142578830 |
| Hot spring microbial community from Yellowstone Hot Springs, sample from Bath Lake Vista Annex - Purple-Sulfur Mats                                                                       | 2016842008 | Environmental   | Aquatic    | Thermal springs                        | Hot (42-90C)  | unclassified  | 57652  | 123 | 54.98 | 0.48 | 41493403  |
| Hot spring microbial community from Yellowstone Hot Springs, sample from Fairy Spring Red Layer                                                                                           | 2016842003 | Environmental   | Aquatic    | Thermal springs                        | Hot (42-90C)  | unclassified  | 55048  | 124 | 54.83 | 0.6  | 36317514  |
| Hot spring microbial community from Yellowstone Hot Springs, sample from OSP Spring YNP14                                                                                                 | 2013954001 | Environmental   | Aquatic    | Thermal springs                        | Hot (42-90C)  | unclassified  | 24201  | 125 | 54.8  | 0.39 | 16164785  |

Supplementary information

|                                                                                                                                                                                               |            |                 |                |                                        |                         |                |         |     |       |      |           |
|-----------------------------------------------------------------------------------------------------------------------------------------------------------------------------------------------|------------|-----------------|----------------|----------------------------------------|-------------------------|----------------|---------|-----|-------|------|-----------|
| Sediment microbial communities from Lake Washington, Seattle, for Methane and Nitrogen Cycles, original sample replicate 1                                                                    | 2149837030 | Environmental   | Aquatic        | Freshwater                             | Lentic                  | Sediment       | 214899  | 126 | 54.8  | 0.48 | 111392199 |
| Fungus garden microbial communities from <i>Atta colombica</i> in Panama, sample from dump top (Dump top)                                                                                     | 2038011000 | Host-associated | Arthropoda     | Symbiotic fungal gardens and galleries | Fungus garden           | unclassified   | 1292128 | 127 | 54.78 | 0.6  | 465469652 |
| Hot spring microbial community from Yellowstone Hot Springs, sample from Octopus Springs                                                                                                      | 2014031007 | Environmental   | Aquatic        | Thermal springs                        | Hot (42-90C)            | unclassified   | 44662   | 128 | 54.73 | 0.47 | 28556353  |
| TA reactor DNA contigs from 4 sample (Terephthalate degrading reactor metagenome contigs from 4 samples)                                                                                      | 2007915000 | Engineered      | Wastewater     | Industrial wastewater                  | Unclassified            | Unclassified   | 94081   | 129 | 54.49 | 0.48 | 59647188  |
| Air microbial communities Singapore indoor air filters 1                                                                                                                                      | 2003000006 | Environmental   | Air            | Indoor Air                             | unclassified            | Unclassified   | 46894   | 130 | 54.3  | 0.62 | 35449373  |
| Aquatic microbial communities from Lake Kinneret (08)                                                                                                                                         | 2010483000 | Environmental   | Aquatic        | Freshwater                             | Lentic                  | Limnetic zone  | 35      | 131 | 54.29 | 0.44 | 36738     |
| Sediment microbial communities from Lake Washington, Seattle, for Methane and Nitrogen Cycles, original sample replicate 1                                                                    | 2149837029 | Environmental   | Aquatic        | Freshwater                             | Lentic                  | Sediment       | 173648  | 132 | 54.2  | 0.47 | 92290447  |
| Hot spring microbial community from Yellowstone Hot Springs, sample from OSP Spring YNP8                                                                                                      | 2013515001 | Environmental   | Aquatic        | Thermal springs                        | Hot (42-90C)            | unclassified   | 31801   | 133 | 54.17 | 0.44 | 21158971  |
| Guerrero Negro salt ponds hypersaline mat 02(H)                                                                                                                                               | 2004247001 | Environmental   | Aquatic        | Non-marine Saline and Alkaline         | Salt crystallizer ponds | Microbial mats | 12153   | 134 | 54.16 | 0.54 | 7469572   |
| Marine microbial communities from the Eastern Subtropical North Pacific Ocean, Expanding Oxygen minimum zones, sample from Line P sample_F_10_SIO3_120 (sample_F_10_SIO3_120 June 2011 assem) | 2189573017 | Environmental   | Aquatic        | Marine                                 | Unclassified            | Unclassified   | 191444  | 135 | 54.04 | 0.4  | 133054468 |
| Methylotrophic community from Lake Washington sediment Formaldehyde enrichment                                                                                                                | 2006207003 | Environmental   | Aquatic        | Freshwater                             | Lentic                  | Sediment       | 90352   | 136 | 54.04 | 0.58 | 57622063  |
| Fossil microbial community from Whale Fall at Santa Cruz Basin of the Pacific Ocean Sample #3                                                                                                 | 2001200004 | Environmental   | Aquatic        | Marine                                 | Fossil                  | Whale fall     | 38271   | 137 | 54.03 | 0.46 | 30784116  |
| Poplar biomass bioreactor microbial communities from Brookhaven National Lab, NY, sample from total biomass decay community (13 April 2010 assembly with 454 paired-end)                      | 2048955003 | Engineered      | Solid waste    | Composting                             | unclassified            | Bioreactor     | 893380  | 138 | 53.97 | 0.56 | 348781313 |
| TCA/MEAL culture (TCA/MEAL culture Nov 2010 assembly with PE data)                                                                                                                            | 2100351010 | Engineered      | Bioremediation | Tetrachloroethylene and derivatives    | Chloroethene            | Bioreactor     | 119855  | 139 | 53.9  | 0.5  | 64373035  |
| Hot spring microbial community from Yellowstone Hot Springs, sample from Joseph's Coat Springs                                                                                                | 2013843003 | Environmental   | Aquatic        | Thermal springs                        | Hot (42-90C)            | unclassified   | 26313   | 140 | 53.84 | 0.53 | 17963232  |
| Sediment microbial communities from Great Boiling Spring, Nevada, sample from cellulolytic enrichment CS 77C (Cellulolytic enrichment CS 77C sediment)                                        | 2088090027 | Environmental   | Aquatic        | Thermal springs                        | Unclassified            | Unclassified   | 82728   | 141 | 53.54 | 0.45 | 42599697  |
| Fungus garden microbial communities from <i>Atta colombica</i> in Panama, sample from dump bottom                                                                                             | 2040502000 | Host-associated | Arthropoda     | Symbiotic fungal                       | Fungus garden           | unclassified   | 1281334 | 142 | 53.49 | 0.65 | 482217958 |

Supplementary information

|                                                                                                                                                                           |            |                 |                |                       |                   |                |        |     |       |      |           |
|---------------------------------------------------------------------------------------------------------------------------------------------------------------------------|------------|-----------------|----------------|-----------------------|-------------------|----------------|--------|-----|-------|------|-----------|
| (Dump bottom)                                                                                                                                                             |            |                 |                | gardens and galleries |                   |                |        |     |       |      |           |
| September 2009 (Assembly with PE data)                                                                                                                                    | 2061766000 | Engineered      | Bioremediation | Hydrocarbon           | Benzene           | Bioreactor     | 207753 | 143 | 53.4  | 0.51 | 80838838  |
| Aquatic microbial communities from Lake Kinneret (06)                                                                                                                     | 2010483001 | Environmental   | Aquatic        | Freshwater            | Lentic            | Limnetic zone  | 30     | 144 | 53.33 | 0.69 | 38585     |
| Marine microbial communities from the Eastern Subtropical North Pacific Ocean, Expanding Oxygen minimum zones, sample from Line P sample_A_09_P04_10 (A_09_P04_10)        | 2156126012 | Environmental   | Aquatic        | Marine                | Unclassified      | Unclassified   | 242648 | 145 | 53.12 | 0.39 | 177724583 |
| Compost Minireactor Metagenome (final assembly)                                                                                                                           | 2029527000 | Engineered      | Solid waste    | Composting            | Grass             | Bioreactor     | 258764 | 146 | 53.1  | 0.58 | 110687544 |
| Hot spring microbial community from Yellowstone Hot Springs, sample from Cistern Spring                                                                                   | 2015219000 | Environmental   | Aquatic        | Thermal springs       | Hot (42-90C)      | unclassified   | 26749  | 147 | 52.84 | 0.5  | 17628346  |
| Hot spring microbial community from Yellowstone Hot Springs, sample from White Creek Site 3                                                                               | 2013515000 | Environmental   | Aquatic        | Thermal springs       | Hot (42-90C)      | unclassified   | 55998  | 148 | 52.77 | 0.51 | 38275783  |
| Miscanthus rhizosphere microbial communities from Kellogg Biological Station, MSU, sample from Bulk Soil Replicate 2: eDNA_1 (Bulk soil 2 January 2011 combined assembly) | 2124908025 | Host-associated | Plants         | Rhizoplane            | Epiphytes         | Unclassified   | 22426  | 149 | 52.48 | 0.57 | 10867947  |
| Single-cell genome from subgingival tooth surface TM7c                                                                                                                    | 2004000001 | Host-associated | Human          | Digestive system      | Oral              | unclassified   | 599    | 150 | 52.42 | 0.39 | 474179    |
| Fossil microbial community from Whale Fall at Santa Cruz Basin of the Pacific Ocean Sample #2                                                                             | 2001200003 | Environmental   | Aquatic        | Marine                | Fossil            | Whale fall     | 42521  | 151 | 52.23 | 0.53 | 32347432  |
| Soil microbial communities from sample at FACE Site 4 Nevada Test Site Crust CO2-                                                                                         | 2032320003 | Environmental   | Terrestrial    | Soil                  | Unclassified      | Unclassified   | 316494 | 152 | 51.98 | 0.68 | 123178563 |
| Switchgrass rhizosphere microbial community from Michigan, US, sample from East Lansing bulk soil                                                                         | 2021593004 | Host-associated | Plants         | Rhizoplane            | Epiphytes         | unclassified   | 273689 | 153 | 51.92 | 0.62 | 113711136 |
| Soil microbial communities from sample at FACE Site 3 Nevada Test Site Creosote CO2+                                                                                      | 2032320002 | Environmental   | Terrestrial    | Soil                  | Unclassified      | Unclassified   | 534745 | 154 | 51.9  | 0.67 | 202685464 |
| Sediment microbial communities from Great Boiling Spring, Nevada, sample from surface sediment (Surface sediment)                                                         | 2053563014 | Environmental   | Aquatic        | Thermal springs       | Unclassified      | Unclassified   | 93338  | 155 | 51.74 | 0.51 | 48184699  |
| Olavius algarvensis endosymbiont metagenome Delta1                                                                                                                        | 2004178001 | Environmental   | Aquatic        | Marine                | Neritic zone      | Unclassified   | 12132  | 156 | 51.65 | 0.49 | 13536737  |
| Miscanthus rhizosphere microbial communities from Kellogg Biological Station, MSU, sample Replicate 2: eDNA_1 (Rhizo 2 January 2011 combined assembly)                    | 2124908027 | Host-associated | Plants         | Rhizoplane            | Epiphytes         | Unclassified   | 83119  | 157 | 51.52 | 0.54 | 44948785  |
| Marine microbial communities from the Eastern Subtropical North Pacific Ocean, Expanding Oxygen minimum zones, sample from Line P sample_F_10_S103_100 (F_10_S103_100)    | 2162886004 | Environmental   | Aquatic        | Marine                | Unclassified      | Unclassified   | 451236 | 158 | 51.22 | 0.4  | 345809224 |
| Soil microbial communities from sample at FACE Site 3 Nevada Test Site Creosote CO2-                                                                                      | 2029527002 | Environmental   | Terrestrial    | Soil                  | Unclassified      | Unclassified   | 318771 | 159 | 51.17 | 0.68 | 113475182 |
| Oak Ridge Pristine Groundwater FRC FW301                                                                                                                                  | 2007427000 | Environmental   | Aquatic        | Freshwater            | Groundwater       | Contaminated   | 170521 | 160 | 50.53 | 0.57 | 106573620 |
| Guerrero Negro salt ponds hypersaline mat 04(N)                                                                                                                           | 2004247003 | Environmental   | Aquatic        | Non-marine Saline and | Salt crystallizer | Microbial mats | 13330  | 161 | 50.32 | 0.56 | 8215056   |

Supplementary information

|                                                                                                                                                                 |            |                 |             |                                |                         |                |        |     |       |      |           |
|-----------------------------------------------------------------------------------------------------------------------------------------------------------------|------------|-----------------|-------------|--------------------------------|-------------------------|----------------|--------|-----|-------|------|-----------|
|                                                                                                                                                                 |            |                 |             | Alkaline                       | ponds                   |                |        |     |       |      |           |
| Larvae (6 May 2010 assembly)                                                                                                                                    | 2084038013 | Host-associated | Arthropoda  | Digestive system               | Unclassified            | Unclassified   | 663502 | 162 | 50.12 | 0.56 | 280968062 |
| Water microbial communities from Great Boiling Spring, Nevada, sample 1 (13 Aug 2010 assembly with PE data)                                                     | 2077657003 | Environmental   | Aquatic     | Thermal springs                | Unclassified            | Unclassified   | 11995  | 163 | 49.94 | 0.48 | 6283876   |
| Switchgrass rhizosphere microbial community from Michigan, US, sample from Rose Lake bulk soil RL3 (Bulk soil RL3 January 2011 combined assembly)               | 2124908021 | Host-associated | Plants      | Rhizoplane                     | Epiphytes               | unclassified   | 41246  | 164 | 49.82 | 0.53 | 20487337  |
| Freshwater microbial communities from Antarctic Deep Lake, sample 24m 3.0um (24 m 3.0 um Illumina only)                                                         | 2061766008 | Environmental   | Aquatic     | Freshwater                     | Lentic                  | Limnetic zone  | 25462  | 165 | 49.75 | 0.59 | 18678739  |
| Soil microbial communities from sample at FACE Site 1 Maryland Estuary CO2- (Maryland Estuary ambient)                                                          | 2032320004 | Environmental   | Terrestrial | Soil                           | Unclassified            | Unclassified   | 481014 | 166 | 49.73 | 0.6  | 189275844 |
| Guerrero Negro salt ponds hypersaline mat 03(l)                                                                                                                 | 2004247002 | Environmental   | Aquatic     | Non-marine Saline and Alkaline | Salt crystallizer ponds | Microbial mats | 13343  | 167 | 49.58 | 0.52 | 8286576   |
| Soil microbial communities from sample at FACE Site 5 Oak Ridge CO2+ (Oak Ridge elevated CO2)                                                                   | 2032320006 | Environmental   | Terrestrial | Soil                           | Unclassified            | Unclassified   | 341601 | 168 | 49.52 | 0.64 | 130858946 |
| white/grey mat (white/grey mat, combined 454/Illumina assembly)                                                                                                 | 2084038012 | Environmental   | Aquatic     | Marine                         | Hydrothermal vents      | Sediment       | 173888 | 169 | 49.47 | 0.37 | 96236450  |
| Freshwater microbial communities from Antarctic Deep Lake, sample 24m 0.8um (24 m 0.8 um 454/Illumina combined Jan 2011)                                        | 2140918017 | Environmental   | Aquatic     | Freshwater                     | Lentic                  | Limnetic zone  | 106722 | 170 | 49.44 | 0.59 | 60876627  |
| Freshwater microbial communities from Trout Bog Lake, WI, sample from Practice 18AUG2009 hypolimnion (Trout Bog Practice 18AUG2009 hypolimnion June 2011 assem) | 2199352002 | Environmental   | Aquatic     | Freshwater                     | Lentic                  | Unclassified   | 163413 | 171 | 48.96 | 0.45 | 72801538  |
| Macropus eugenii forestomach microbiome from Canberra, Australia, sample Macropus_eugenii_combined                                                              | 2013338003 | Host-associated | Mammals     | Digestive system               | Stomach                 | unclassified   | 79862  | 172 | 48.95 | 0.44 | 53866884  |
| Switchgrass rhizosphere microbial community from Michigan, US, sample from Rose Lake rhizosphere BV2.2 (BV2.2 January 2011 combined assembly)                   | 2124908018 | Host-associated | Plants      | Rhizoplane                     | Epiphytes               | unclassified   | 17507  | 173 | 48.91 | 0.58 | 8465840   |
| 4_Deep_abys                                                                                                                                                     | 2014642004 | Environmental   | Aquatic     | Marine                         | Oceanic                 | unclassified   | 16740  | 174 | 48.54 | 0.54 | 11028821  |
| Soil microbial communities from sample at FACE Site 2 North Carolina CO2-                                                                                       | 2035918004 | Environmental   | Terrestrial | Soil                           | Unclassified            | Unclassified   | 266562 | 175 | 48.46 | 0.61 | 124108791 |
| Soil microbial communities from sample at FACE Site 5 Oak Ridge CO2- (Oak Ridge ambient)                                                                        | 2032320005 | Environmental   | Terrestrial | Soil                           | Unclassified            | Unclassified   | 401954 | 176 | 48.44 | 0.63 | 157702128 |
| Saline water microbial communities from Great Salt Lake, Utah, sample from South Arm Antelope Island 1 (South Arm Antelope Island)                              | 2058419001 | Environmental   | Aquatic     | Non-marine Saline and Alkaline | Saline                  | unclassified   | 173719 | 177 | 48.35 | 0.57 | 67538519  |
| Soil microbial communities sample from Light Crust, Colorado Plateau, Green Butte (Light Crust, Colorado Plateau, Green Butte 2 June 2011 assem)                | 2199352006 | Environmental   | Terrestrial | Soil                           | Unclassified            | Unclassified   | 18673  | 178 | 48.35 | 0.46 | 9280519   |
| Soil microbial communities from sample at FACE Site                                                                                                             | 2040502001 | Environmental   | Terrestrial | Soil                           | Unclassified            | Unclassified   | 364865 | 179 | 48.29 | 0.61 | 143751359 |

Supplementary information

|                                                                                                                                                                             |            |               |            |                                |                              |                  |        |     |       |      |           |
|-----------------------------------------------------------------------------------------------------------------------------------------------------------------------------|------------|---------------|------------|--------------------------------|------------------------------|------------------|--------|-----|-------|------|-----------|
| 2 North Carolina CO2+ (North Carolina Elevated CO2)                                                                                                                         |            |               |            |                                |                              |                  |        |     |       |      |           |
| Saline water microbial communities from Great Salt Lake, Utah, sample from South Arm Stromatolite (South Arm Stromatolite)                                                  | 2077657010 | Environmental | Aquatic    | Non-marine Saline and Alkaline | Saline                       | unclassified     | 408738 | 180 | 48.27 | 0.55 | 156436365 |
| Sediment microbial communities from Lake Washington, Seattle, for Methane and Nitrogen Cycles, sample SIP 13C methane aerobic+nitrate (Aerobic with added nitrate, 13C SIP) | 2046860006 | Environmental | Aquatic    | Freshwater                     | Lentic                       | Sediment         | 216380 | 181 | 48.24 | 0.55 | 80246742  |
| 7_Oxygen_minimum_layer                                                                                                                                                      | 2014642003 | Environmental | Aquatic    | Marine                         | Oceanic                      | unclassified     | 16686  | 182 | 48.21 | 0.48 | 11811597  |
| Sediment microbial communities from Great Boiling Spring, Nevada, sample from Cellulolytic enrichment CS 85C (GBS Cellulolytic enrichment CS 85C sediment)                  | 2100351009 | Environmental | Aquatic    | Thermal springs                | Unclassified                 | Unclassified     | 165257 | 183 | 48.17 | 0.47 | 74591189  |
| Wastewater treatment plant plasmid pool from Canton de Vaud, Switzerland, sample from Visp2009                                                                              | 2035918001 | Engineered    | Wastewater | Nutrient removal               | Dissolved organics (aerobic) | Activated sludge | 23869  | 184 | 48.13 | 0.6  | 12200307  |
| Guerrero Negro salt ponds hypersaline mat 06(P)                                                                                                                             | 2004247005 | Environmental | Aquatic    | Non-marine Saline and Alkaline | Salt crystallizer ponds      | Microbial mats   | 13462  | 185 | 48.03 | 0.57 | 8377132   |
| Guerrero Negro salt ponds hypersaline mat 07(S)                                                                                                                             | 2004247006 | Environmental | Aquatic    | Non-marine Saline and Alkaline | Salt crystallizer ponds      | Microbial mats   | 16016  | 186 | 47.96 | 0.56 | 9864533   |
| Guerrero Negro salt ponds hypersaline mat 05(O)                                                                                                                             | 2004247004 | Environmental | Aquatic    | Non-marine Saline and Alkaline | Salt crystallizer ponds      | Microbial mats   | 16053  | 187 | 47.88 | 0.57 | 9803980   |
| Hot spring microbial community from Yellowstone Hot Springs, sample from Monarch Geyser, Norris Geyser Basin                                                                | 2014031003 | Environmental | Aquatic    | Thermal springs                | Hot (42-90C)                 | unclassified     | 20237  | 188 | 47.86 | 0.52 | 12778632  |
| Freshwater microbial communities from Lake Mendota, WI, sample from Practice 20APR2010 epilimnion (Lake Mendota Practice 20APR2010 epilimnion June 2011 assem)              | 2199352003 | Environmental | Aquatic    | Freshwater                     | Lentic                       | Unclassified     | 60268  | 189 | 47.83 | 0.41 | 27640358  |
| Marine sediment archaeal communities from Santa Barbara Basin, CA, that are methane-oxidizing, sample 15-18 cm (ANME Sed A12 15-18 cm)                                      | 2140918004 | Environmental | Aquatic    | Marine                         | Intertidal zone              | Sediment         | 48112  | 190 | 47.69 | 0.44 | 21758522  |
| Guerrero Negro salt ponds hypersaline mat 08(T)                                                                                                                             | 2004247007 | Environmental | Aquatic    | Non-marine Saline and Alkaline | Salt crystallizer ponds      | Microbial mats   | 13177  | 191 | 47.53 | 0.57 | 8017278   |
| Freshwater microbial communities from Lake Mendota, WI, sample from Practice 15JUN2010 epilimnion (Lake Mendota Practice 15JUN2010 epilimnion June 2011 assem)              | 2199352004 | Environmental | Aquatic    | Freshwater                     | Lentic                       | Unclassified     | 160817 | 192 | 47.42 | 0.39 | 71094217  |
| Saline water microbial communities from Great Salt Lake, Utah, sample from North Arm Stromatolite (North Arm Stromatolite)                                                  | 2058419003 | Environmental | Aquatic    | Non-marine Saline and Alkaline | Saline                       | unclassified     | 130059 | 193 | 47.36 | 0.63 | 52414178  |
| Freshwater microbial communities from Trout Bog                                                                                                                             | 2199352000 | Environmental | Aquatic    | Freshwater                     | Lentic                       | Unclassified     | 183726 | 194 | 47.26 | 0.43 | 87219173  |

Supplementary information

|                                                                                                                                                                                               |            |                 |                   |                                |                         |                |         |     |       |      |            |
|-----------------------------------------------------------------------------------------------------------------------------------------------------------------------------------------------|------------|-----------------|-------------------|--------------------------------|-------------------------|----------------|---------|-----|-------|------|------------|
| Lake, WI, sample from Practice 03JUN2009 hypolimnion (Trout Bog Practice 03JUN2009 hypolimnion June 2011 assem)                                                                               |            |                 |                   |                                |                         |                |         |     |       |      |            |
| Guerrero Negro salt ponds hypersaline mat 09(Y)                                                                                                                                               | 2004247008 | Environmental   | Aquatic           | Non-marine Saline and Alkaline | Salt crystallizer ponds | Microbial mats | 13798   | 195 | 47.14 | 0.59 | 8382678    |
| 5_Below_upper_mesopelagic                                                                                                                                                                     | 2014642002 | Environmental   | Aquatic           | Marine                         | Oceanic                 | unclassified   | 13784   | 196 | 46.97 | 0.52 | 8764592    |
| Water microbial communities from Great Boiling Spring, Nevada, sample 1 (Water borne 27 Oct 2010 assembly)                                                                                    | 2084038020 | Environmental   | Aquatic           | Thermal springs                | Unclassified            | Unclassified   | 14352   | 197 | 46.88 | 0.47 | 7181123    |
| red mat (Red mat combined assembly)                                                                                                                                                           | 2088090030 | Environmental   | Aquatic           | Marine                         | Hydrothermal vents      | Sediment       | 133323  | 198 | 46.86 | 0.48 | 69423586   |
| sample 2                                                                                                                                                                                      | 2019105002 | Host-associated | Mammals           | Digestive system               | Large intestine         | Fecal          | 480320  | 199 | 46.77 | 0.4  | 165356062  |
| sample 1                                                                                                                                                                                      | 2019105001 | Host-associated | Mammals           | Digestive system               | Large intestine         | Fecal          | 678420  | 200 | 46.7  | 0.41 | 241070849  |
| Biofuel metagenome 1 (454/Illumina combined assembly)                                                                                                                                         | 2100351000 | Engineered      | Biotransformation | Unclassified                   | Unclassified            | Unclassified   | 2706009 | 201 | 46.33 | 0.42 | 1275044948 |
| Soil microbial communities from sample at FACE Site 4 Nevada Test Site Crust CO2+ (NTS Crust elevated CO2)                                                                                    | 2035918005 | Environmental   | Terrestrial       | Soil                           | Unclassified            | Unclassified   | 629698  | 202 | 46.25 | 0.66 | 252083467  |
| Sediment microbial communities from Lake Washington, Seattle, for Methane and Nitrogen Cycles, sample SIP 13C-methane anaerobic+nitrate (Anaerobic + nitrate SIP Nov 2010 with PE)            | 2088090009 | Environmental   | Aquatic           | Freshwater                     | Lentic                  | Sediment       | 948029  | 203 | 46.01 | 0.61 | 354011745  |
| Hot spring microbial communities from Yellowstone National Park, One Hundred Springs Plain, sample OSP_C (OSP_C)                                                                              | 2077657024 | Environmental   | Aquatic           | Thermal springs                | Unclassified            | Unclassified   | 65660   | 204 | 45.9  | 0.41 | 27950878   |
| Soil microbial communities sample from Dark Crust, Colorado Plateau, Green Butte (Dark Crust, Colorado Plateau, Green Butte June 2011 assem)                                                  | 2209111000 | Environmental   | Terrestrial       | Soil                           | Unclassified            | Unclassified   | 1058313 | 205 | 45.87 | 0.61 | 396718301  |
| Marine microbial communities from the Eastern Subtropical North Pacific Ocean, Expanding Oxygen minimum zones, sample from Line P sample_F_10_SI03_100 (sample_F_10_SI03_100 June 2011 assem) | 2189573016 | Environmental   | Aquatic           | Marine                         | Unclassified            | Unclassified   | 204059  | 206 | 45.71 | 0.39 | 144622098  |
| Soil microbial communities from sample at FACE Site 1 Maryland Estuary CO2+ (Maryland Estuary elevated)                                                                                       | 2035918006 | Environmental   | Terrestrial       | Soil                           | Unclassified            | Unclassified   | 387519  | 207 | 45.6  | 0.59 | 156317799  |
| Soil microbial communities from sample at FACE Site NTS_007 Nevada Test Site (NTS_007)                                                                                                        | 2119805009 | Environmental   | Terrestrial       | Soil                           | Unclassified            | Unclassified   | 1027241 | 208 | 45.56 | 0.66 | 384251082  |
| Anaerobic methane oxidation (AOM) community from Eel River Basin sediment, California                                                                                                         | 2004175001 | Environmental   | Aquatic           | Marine                         | Neritic zone            | Sediment       | 2386    | 209 | 44.97 | 0.44 | 2116255    |
| Marine sediment archaeal communities from Santa Barbara Basin, CA, that are methane-oxidizing, sample 6-9 cm (ANME Sed A12 6-9 cm)                                                            | 2077657014 | Environmental   | Aquatic           | Marine                         | Intertidal zone         | Sediment       | 194553  | 210 | 44.87 | 0.45 | 92521799   |

Supplementary information

|                                                                                                                                                                                       |            |                 |             |                                |                         |                |         |     |       |      |           |
|---------------------------------------------------------------------------------------------------------------------------------------------------------------------------------------|------------|-----------------|-------------|--------------------------------|-------------------------|----------------|---------|-----|-------|------|-----------|
| Guerrero Negro salt ponds hypersaline mat 10(Z)                                                                                                                                       | 2004247009 | Environmental   | Aquatic     | Non-marine Saline and Alkaline | Salt crystallizer ponds | Microbial mats | 12094   | 211 | 44.86 | 0.56 | 7240715   |
| Sediment microbial communities from Lake Washington, Seattle, for Methane and Nitrogen Cycles, sample SIP 13C-methane anaerobic+nitrate (Anaerobic with added nitrate, 13C SIP)       | 2046860004 | Environmental   | Aquatic     | Freshwater                     | Lentic                  | Sediment       | 371171  | 212 | 44.43 | 0.65 | 139776104 |
| Sediment microbial communities from Lake Washington, Seattle, for Methane and Nitrogen Cycles, sample SIP 13Cmethane anaerobic no nitrate (Anaerobic no nitrate SIP Nov 2010 with PE) | 2088090013 | Environmental   | Aquatic     | Freshwater                     | Lentic                  | Sediment       | 821124  | 213 | 44.35 | 0.52 | 308706277 |
| Marine sediment archaeal communities from Santa Barbara Basin, CA, that are methane-oxidizing, sample 0-3 cm (ANME Sed A12 0-3 cm)                                                    | 2077657018 | Environmental   | Aquatic     | Marine                         | Intertidal zone         | Sediment       | 556736  | 214 | 44.34 | 0.48 | 202177532 |
| 1_Upper_euphotic                                                                                                                                                                      | 2014613002 | Environmental   | Aquatic     | Marine                         | Oceanic                 | unclassified   | 11252   | 215 | 44.25 | 0.49 | 7482595   |
| Soil microbial communities from sample at Multiple FACE and OTC sites (NTS_010)                                                                                                       | 2119805011 | Environmental   | Terrestrial | Soil                           | Unclassified            | Unclassified   | 913909  | 216 | 43.85 | 0.65 | 345080991 |
| Soil microbial communities from sample at FACE Site Metagenome WIR_Oz2 (WIR_Oz2)                                                                                                      | 2124908006 | Environmental   | Terrestrial | Soil                           | Unclassified            | Unclassified   | 930722  | 217 | 43.75 | 0.61 | 339617125 |
| Marine sediment archaeal communities from Santa Barbara Basin, CA, that are methane-oxidizing, sample 12-15 cm (ANME Sed A12 12-15 cm)                                                | 2140918003 | Environmental   | Aquatic     | Marine                         | Intertidal zone         | Sediment       | 70150   | 218 | 43.58 | 0.44 | 30097641  |
| Soil microbial communities from Minnesota Farm                                                                                                                                        | 2001200001 | Environmental   | Terrestrial | Soil                           | Unclassified            | unclassified   | 185274  | 219 | 43.55 | 0.58 | 152406385 |
| Soil microbial communities from sample at FACE Site North Carolina NCD_ElevF (NCD_ElevF)                                                                                              | 2124908001 | Environmental   | Terrestrial | Soil                           | Unclassified            | Unclassified   | 1200786 | 220 | 43.48 | 0.62 | 446081858 |
| Soil microbial communities from sample at FACE Site NTS_067 Nevada Test Site (NTS_067)                                                                                                | 2119805012 | Environmental   | Terrestrial | Soil                           | Unclassified            | Unclassified   | 1036364 | 221 | 43.48 | 0.63 | 390792833 |
| Single-cell genome from subgingival tooth surface TM7a                                                                                                                                | 2004247010 | Host-associated | Human       | Digestive system               | Oral                    | unclassified   | 3208    | 222 | 43.3  | 0.34 | 2864887   |
| Soil microbial communities from sample at FACE Site North Carolina NCD_AmbF (NCD_AmbF)                                                                                                | 2119805010 | Environmental   | Terrestrial | Soil                           | Unclassified            | Unclassified   | 834028  | 223 | 43.29 | 0.61 | 324411358 |
| Soil microbial communities from sample at FACE Site NTS_071 Nevada Test Site (NTS_071)                                                                                                | 2081372006 | Environmental   | Terrestrial | Soil                           | Unclassified            | Unclassified   | 835177  | 224 | 43.27 | 0.64 | 336899453 |
| Hot spring microbial communities from Yellowstone National Park, One Hundred Springs Plain, sample OSP_B (OSP_B)                                                                      | 2077657023 | Environmental   | Aquatic     | Thermal springs                | Unclassified            | Unclassified   | 81287   | 225 | 43.24 | 0.43 | 35803982  |
| 3_Below_base_of_euphotic                                                                                                                                                              | 2014642001 | Environmental   | Aquatic     | Marine                         | Oceanic                 | unclassified   | 11155   | 226 | 43.22 | 0.51 | 7829614   |
| Sediment microbial communities from Lake Washington, Seattle, for Methane and Nitrogen Cycles, sample SIP 13C-methane aerobic no nitrate (Aerobic without added nitrate, 13C SIP)     | 2046860007 | Environmental   | Aquatic     | Freshwater                     | Lentic                  | Sediment       | 210153  | 227 | 42.96 | 0.52 | 76631179  |
| Soil microbial communities from sample at FACE Site Metagenome WIR_Amb2 (WIR_Amb2)                                                                                                    | 2124908009 | Environmental   | Terrestrial | Soil                           | Unclassified            | Unclassified   | 1057446 | 228 | 42.92 | 0.61 | 380912680 |
| Soil microbial communities from sample at FACE Site Metagenome WIR_ElevOz2 (WIR_ElevOz2)                                                                                              | 2124908007 | Environmental   | Terrestrial | Soil                           | Unclassified            | Unclassified   | 1040212 | 229 | 42.86 | 0.61 | 386839648 |

Supplementary information

|                                                                                                                                                                                                  |            |                 |             |                                |                 |               |             |     |       |      |           |
|--------------------------------------------------------------------------------------------------------------------------------------------------------------------------------------------------|------------|-----------------|-------------|--------------------------------|-----------------|---------------|-------------|-----|-------|------|-----------|
| Endophytic microbiome from Rice                                                                                                                                                                  | 2010549000 | Host-associated | Plants      | Rhizoplane                     | Endophytes      | Unclassified  | 64542       | 230 | 42.85 | 0.53 | 46747680  |
| Hot spring microbial community from Beowulf Spring, Yellowstone National Park, sample YNP_Beowulf Spring_D (YNP_Beowulf Spring_D)                                                                | 2119805007 | Environmental   | Aquatic     | Thermal springs                | Hot (42-90C)    | Unclassified  | 128754      | 231 | 42.76 | 0.43 | 60745063  |
| Freshwater microbial communities from Trout Bog Lake, WI sample from Practice 03JUN2009 epilimnion (Trout Bog Practice 03JUN2009 epilimnion June 2011 assem)                                     | 2199034001 | Environmental   | Aquatic     | Freshwater                     | Lentic          | Unclassified  | 250807      | 232 | 42.69 | 0.43 | 120283607 |
| Sediment microbial communities from Lake Washington, Seattle, for Methane and Nitrogen Cycles, sample from flow sorted anaerobic no nitrate (Flow sorted anaerobic no nitrate Feb 2011 assembly) | 2140918012 | Environmental   | Aquatic     | Freshwater                     | Lentic          | Sediment      | 96914       | 233 | 42.69 | 0.42 | 47869084  |
| Soil microbial communities from sample at FACE Site Metagenome WIR_Elev2 (WIR_Elev2)                                                                                                             | 2124908008 | Environmental   | Terrestrial | Soil                           | Unclassified    | Unclassified  | 103802<br>5 | 234 | 42.46 | 0.61 | 380892539 |
| Sediment microbial communities from Lake Washington, Seattle, for Methane and Nitrogen Cycles, sample from flow sorted anaerobic no nitrate (WGA anaerobic no nitrate)                           | 2124908000 | Environmental   | Aquatic     | Freshwater                     | Lentic          | Sediment      | 69699       | 235 | 42.36 | 0.42 | 33111482  |
| Marine sediment archaeal communities from Santa Barbara Basin, CA, that are methane-oxidizing, sample 9-12 cm (ANME Sed A12 9-12 cm)                                                             | 2084038021 | Environmental   | Aquatic     | Marine                         | Intertidal zone | Sediment      | 239177      | 236 | 42.31 | 0.43 | 90913355  |
| Freshwater microbial communities from Antarctic Deep Lake, sample 24m 3.0um (24 m 3.0 um Sept 2010 combined)                                                                                     | 2081372007 | Environmental   | Aquatic     | Freshwater                     | Lentic          | Limnetic zone | 118816      | 237 | 42.09 | 0.58 | 56949331  |
| Sakinaw Lake 454 metagenomics (120m): eDNA_2 (120 m)                                                                                                                                             | 2088090031 | Environmental   | Aquatic     | Freshwater                     | Lentic          | Unclassified  | 299533      | 238 | 41.97 | 0.45 | 120376854 |
| Saline water microbial communities from Great Salt Lake, Utah, sample from North Arm Rozel Point                                                                                                 | 2051774008 | Environmental   | Aquatic     | Non-marine Saline and Alkaline | Saline          | unclassified  | 247708      | 239 | 41.94 | 0.6  | 99427575  |
| Sediment microbial communities from Lake Washington, Seattle, for Methane and Nitrogen Cycles, original sample replicate 2 (Original sample replicate 2 12C fraction)                            | 2088090006 | Environmental   | Aquatic     | Freshwater                     | Lentic          | Sediment      | 114739<br>8 | 240 | 41.37 | 0.59 | 412615791 |
| 2_Base_of_chrolophyll_max                                                                                                                                                                        | 2014613003 | Environmental   | Aquatic     | Marine                         | Oceanic         | unclassified  | 7696        | 241 | 41.36 | 0.53 | 6091158   |
| Single-cell genome from subgingival tooth surface TM7b                                                                                                                                           | 2005503000 | Host-associated | Human       | Digestive system               | Oral            | unclassified  | 194         | 242 | 41.24 | 0.37 | 112753    |
| Crater Hills                                                                                                                                                                                     | 2015391000 | Host-associated | Microbial   | Archaea                        | Virionome       | Unclassified  | 2688        | 243 | 41.18 | 0.46 | 1715199   |
| Sediment microbial communities from Lake Washington, Seattle, for Methane and Nitrogen Cycles, original sample replicate 1 (Original sample replicate 1)                                         | 2088090005 | Environmental   | Aquatic     | Freshwater                     | Lentic          | Sediment      | 155472<br>1 | 244 | 40.81 | 0.57 | 559537102 |
| Fresh water microbial communities from LaBonte Lake, Laramie, Wyoming, sample from peak-bloom 2 (Peak bloom metagenome 2)                                                                        | 2166559021 | Environmental   | Aquatic     | Freshwater                     | Lentic          | unclassified  | 475224      | 245 | 40.14 | 0.52 | 170450482 |
| Hot spring microbial community from Beowulf                                                                                                                                                      | 2100351008 | Environmental   | Aquatic     | Thermal                        | Hot (42-90C)    | Unclassified  | 140835      | 246 | 39.89 | 0.42 | 66680933  |



Supplementary information

|                                                                                                                                                                                    |            |                 |            |                  |                               |                  |         |     |       |      |           |
|------------------------------------------------------------------------------------------------------------------------------------------------------------------------------------|------------|-----------------|------------|------------------|-------------------------------|------------------|---------|-----|-------|------|-----------|
| Spring, Yellowstone National Park, sample YNP_Beowulf Spring_E (YNP_Beowulf Spring_E)                                                                                              |            |                 |            | springs          |                               |                  |         |     |       |      |           |
| Sediment microbial communities from Arctic Ocean, off the coast from Alaska, sample from low methane PC12-247-20cm (Low methane PC12-247-20cm)                                     | 2100351001 | Environmental   | Aquatic    | Marine           | Neritic zone                  | Unclassified     | 789043  | 247 | 39.7  | 0.53 | 312796620 |
| Termite Protist Endosymbiont Community                                                                                                                                             | 2021593003 | Host-associated | Microbial  | Protists         | Endosymbionts                 | Unclassified     | 39020   | 248 | 39.49 | 0.39 | 24858616  |
| Sludge/US Virion (fgenesb)                                                                                                                                                         | 2007300000 | Engineered      | Wastewater | Nutrient removal | Biological phosphorus removal | Bioreactor       | 8605    | 249 | 38.91 | 0.56 | 5822105   |
| Hot spring microbial communities from Yellowstone National Park, One Hundred Springs Plain, sample OSP_D (OSP_D)                                                                   | 2140918001 | Environmental   | Aquatic    | Thermal springs  |                               | Unclassified     | 116192  | 250 | 38.57 | 0.42 | 51518426  |
| Sediment microbial communities from Lake Washington, Seattle, for Methane and Nitrogen Cycles, sample from flow sorted aerobic plus nitrate (Flow sorted aerobic plus nitrate)     | 2100351007 | Environmental   | Aquatic    | Freshwater       | Lentic                        | Sediment         | 1065361 | 251 | 38.48 | 0.46 | 386453037 |
| Maize rhizosphere soil microbial communities from University of Illinois Energy Farm, Urbana, IL (Soil sample from rhizosphere of corn (Zea mays))                                 | 2044078001 | Host-associated | Plants     | Rhizoplane       | Epiphytes                     | Unclassified     | 113040  | 252 | 38.38 | 0.63 | 39566506  |
| Wastewater treatment plant plasmid pool from Canton de Vaud, Switzerland, sample from Bief Morges ,2009                                                                            | 2035918002 | Engineered      | Wastewater | Nutrient removal | Dissolved organics (aerobic)  | Activated sludge | 30169   | 253 | 38.25 | 0.51 | 13057318  |
| Maize field bulk soil microbial communities from University of Illinois Energy Farm, Urbana, IL (Bulk soil sample from field growing corn (Zea mays))                              | 2044078000 | Host-associated | Plants     | Rhizoplane       | Epiphytes                     | Unclassified     | 124423  | 254 | 38.23 | 0.63 | 43495537  |
| Sediment microbial communities from Lake Washington, Seattle, for Methane and Nitrogen Cycles, sample from flow sorted anaerobic plus nitrate (Flow sorted anaerobic plus nitrate) | 2088090007 | Environmental   | Aquatic    | Freshwater       | Lentic                        | Sediment         | 1015830 | 255 | 38.15 | 0.46 | 372237563 |
| Nymph Lake Bulk Water                                                                                                                                                              | 2015219006 | Host-associated | Microbial  | Archaea          | Viriome                       | Unclassified     | 1551    | 256 | 37.72 | 0.54 | 878429    |
| Fresh water microbial communities from LaBonte Lake, Laramie, Wyoming, sample from Water peak-bloom 1 (Peak bloom metagenome 1)                                                    | 2166559023 | Environmental   | Aquatic    | Freshwater       | Lentic                        | unclassified     | 377430  | 257 | 37.52 | 0.48 | 140026676 |
| Miscanthus field bulk soil microbial communities from University of Illinois Energy Farm, Urbana, IL (Bulk soil sample from field growing Miscanthus x giganteus)                  | 2044078003 | Host-associated | Plants     | Rhizoplane       | Epiphytes                     | Unclassified     | 165002  | 258 | 37.45 | 0.62 | 58125848  |
| Sediment microbial communities from Lake Washington, Seattle, for Methane and Nitrogen Cycles, sample from flow sorted aerobic no nitrate (Flow sorted aerobic no nitrate)         | 2084038009 | Environmental   | Aquatic    | Freshwater       | Lentic                        | Sediment         | 1059847 | 259 | 37.45 | 0.45 | 396601732 |
| Fresh water microbial communities from LaBonte Lake, Laramie, Wyoming, sample from post-bloom (post-bloom)                                                                         | 2149837011 | Environmental   | Aquatic    | Freshwater       | Lentic                        | unclassified     | 144065  | 260 | 36.95 | 0.49 | 57916305  |
| Miscanthus rhizosphere soil microbial communities from University of Illinois Energy Farm, Urbana, IL                                                                              | 2044078002 | Host-associated | Plants     | Rhizoplane       | Epiphytes                     | Unclassified     | 81222   | 261 | 36.78 | 0.62 | 27992371  |

Supplementary information

|                                                                                                                                                                                      |            |                 |            |                  |                              |                  |        |     |       |      |           |
|--------------------------------------------------------------------------------------------------------------------------------------------------------------------------------------|------------|-----------------|------------|------------------|------------------------------|------------------|--------|-----|-------|------|-----------|
| (Rhizosphere soil sample of Miscanthus x giganteus)                                                                                                                                  |            |                 |            |                  |                              |                  |        |     |       |      |           |
| 6_Upper_euphotic                                                                                                                                                                     | 2014642000 | Environmental   | Aquatic    | Marine           | Oceanic                      | unclassified     | 16067  | 262 | 36.76 | 0.49 | 10828386  |
| Switchgrass field bulk soil microbial communities from University of Illinois Energy Farm, Urbana, IL (Bulk soil sample from field growing switchgrass (Panicum virgatum))           | 2044078005 | Host-associated | Plants     | Rhizoplane       | Epiphytes                    | Unclassified     | 52944  | 263 | 36.57 | 0.61 | 18598591  |
| Wastewater treatment plant plasmid pool from Canton de Vaud, Switzerland, sample from Preverenges, Morges2007/09 (MIRA contigs, 5x coverage)                                         | 2209111023 | Engineered      | Wastewater | Nutrient removal | Dissolved organics (aerobic) | Activated sludge | 3370   | 264 | 36.5  | 0.55 | 2205548   |
| Switchgrass soil microbial communities from University of Illinois Energy Farm, Urbana, IL (Rhizosphere soil sample from switchgrass (Panicum virgatum))                             | 2044078004 | Host-associated | Plants     | Rhizoplane       | Epiphytes                    | Unclassified     | 79586  | 265 | 36.36 | 0.62 | 27453735  |
| Marine sediment archaeal communities from Santa Barbara Basin, CA, that are methane-oxidizing, sample 3-6 cm (ANME Sed A12 3-6 cm)                                                   | 2077657019 | Environmental   | Aquatic    | Marine           | Intertidal zone              | Sediment         | 122604 | 266 | 36.3  | 0.43 | 58173635  |
| Sediment microbial communities from Lake Washington, Seattle, for Methane and Nitrogen Cycles, sample SIP 13Cmethane anaerobic no nitrate (Anaerobic without added nitrate, 13C SIP) | 2046860008 | Environmental   | Aquatic    | Freshwater       | Lentic                       | Sediment         | 160657 | 267 | 36.07 | 0.49 | 59711589  |
| Sediment microbial communities from Arctic Ocean, off the coast from Alaska, sample from low methane PC12-244-90cm (Low methane PC12-244-90cm Sept2010 assembly)                     | 2100351012 | Environmental   | Aquatic    | Marine           | Neritic zone                 | Unclassified     | 823046 | 268 | 35.77 | 0.48 | 339945372 |
| Freshwater microbial communities from Trout Bog Lake, WI sample from Practice 18AUG2009 epilimnion (Trout Bog Practice 18AUG2009 epilimnion June 2011 assem)                         | 2199352001 | Environmental   | Aquatic    | Freshwater       | Lentic                       | Unclassified     | 183791 | 269 | 35.2  | 0.43 | 82338961  |
| Fresh water microbial communities from LaBonte Lake, Laramie, Wyoming, sample from algal/cyanobacterial bloom material peak-bloom 2 (algal/cyano bloom peak-bloom 2)                 | 2189573023 | Environmental   | Aquatic    | Freshwater       | Lentic                       | unclassified     | 669817 | 270 | 35.02 | 0.51 | 268405022 |
| Fresh water microbial communities from LaBonte Lake, Laramie, Wyoming, sample from algal/cyanobacterial bloom material peak-bloom 1 (algal/cyano bloom peak-bloom 1)                 | 2166559022 | Environmental   | Aquatic    | Freshwater       | Lentic                       | unclassified     | 365628 | 271 | 34.75 | 0.52 | 147266570 |
| Wastewater treatment plant plasmid pool from Canton de Vaud, Switzerland, sample from Preverenges, Morges                                                                            | 2013843001 | Engineered      | Wastewater | Nutrient removal | Dissolved organics (aerobic) | Activated sludge | 43340  | 272 | 34.05 | 0.53 | 28569177  |
| Sediment microbial communities from Arctic Ocean, off the coast from Alaska, sample from high methane PC12-236-260cm (High methane PC12-236-260cm)                                   | 2088090012 | Environmental   | Aquatic    | Marine           | Neritic zone                 | Unclassified     | 350243 | 273 | 33.98 | 0.46 | 191647483 |
| Marine Trichodesmium cyanobacterial communities from the Bermuda Atlantic Time-Series                                                                                                | 2156126005 | Environmental   | Aquatic    | Marine           | Neritic zone                 | Unclassified     | 242907 | 274 | 33.55 | 0.4  | 131475334 |
| Fresh water microbial communities from LaBonte Lake, Laramie, Wyoming, sample from Water pre-                                                                                        | 2149837010 | Environmental   | Aquatic    | Freshwater       | Lentic                       | unclassified     | 367751 | 275 | 32.62 | 0.49 | 139235803 |

Supplementary information

|                                                                                                                                                                                                                            |            |                 |            |                                        |                |               |             |     |       |      |           |
|----------------------------------------------------------------------------------------------------------------------------------------------------------------------------------------------------------------------------|------------|-----------------|------------|----------------------------------------|----------------|---------------|-------------|-----|-------|------|-----------|
| bloom metagenome (pre-bloom)                                                                                                                                                                                               |            |                 |            |                                        |                |               |             |     |       |      |           |
| Sediment microbial communities from Arctic Ocean, off the coast from Alaska, sample from high methane PC12-225-485cm (High methane PC12-225-485cm Dec 2010 assembly)                                                       | 2100351006 | Environmental   | Aquatic    | Marine                                 | Neritic zone   | Unclassified  | 645119      | 276 | 31.76 | 0.45 | 310089302 |
| Xyleborus affinis microbiome from Bern, Switzerland, sample of adult community (Ambrosia beetle adult)                                                                                                                     | 2043231000 | Host-associated | Arthropoda | Symbiotic fungal gardens and galleries | Fungus gallery | Unclassified  | 120235      | 277 | 31.28 | 0.41 | 88061459  |
| Sediment microbial communities from Lake Washington, Seattle, for Methane and Nitrogen Cycles, sample from SIP 13C-methane aerobic no nitrate additional fraction (Aerobic without added nitrate, SIP additional fraction) | 2046860005 | Environmental   | Aquatic    | Freshwater                             | Lentic         | Sediment      | 157525      | 278 | 31.23 | 0.44 | 58805457  |
| Sediment microbial communities from Arctic Ocean, off the coast from Alaska, sample from high methane PC12-225-485cm (High methane PC12-225-485cm Jan 2011 assembly)                                                       | 2140918005 | Environmental   | Aquatic    | Marine                                 | Neritic zone   | Unclassified  | 674403      | 279 | 30.63 | 0.45 | 310086717 |
| Xyleborus affinis microbiome from Bern, Switzerland, sample of larvae (Larvae community)                                                                                                                                   | 2044078011 | Host-associated | Arthropoda | Symbiotic fungal gardens and galleries | Fungus gallery | Unclassified  | 83071       | 280 | 30.56 | 0.43 | 54155335  |
| Freshwater microbial communities from Antarctic Deep Lake, sample 5mRS 0.1um (5 mRS 0.1um 454 only)                                                                                                                        | 2084038019 | Environmental   | Aquatic    | Freshwater                             | Lentic         | Limnetic zone | 125908      | 281 | 28.31 | 0.55 | 52160100  |
| Freshwater microbial communities from Antarctic Deep Lake, sample 24m 0.1um (24 m 0.1 um 454 only)                                                                                                                         | 2084038011 | Environmental   | Aquatic    | Freshwater                             | Lentic         | Limnetic zone | 141524      | 282 | 27.58 | 0.56 | 59385153  |
| Sediment microbial communities from Arctic Ocean, off the coast from Alaska, sample from medium methane PC12-240-170cm (Medium methane PC12-240-170cm Sept2010 assembly)                                                   | 2100351011 | Environmental   | Aquatic    | Marine                                 | Neritic zone   | Unclassified  | 107102<br>4 | 283 | 26.87 | 0.45 | 386166283 |
| Freshwater microbial communities from Antarctic Deep Lake, sample 36m 3.0um, 0.8um, 0.1um pool (HWGG+HTSY Jan 2011)                                                                                                        | 2140918027 | Environmental   | Aquatic    | Freshwater                             | Lentic         | Limnetic zone | 475716      | 284 | 24.66 | 0.53 | 190563105 |
| Freshwater microbial communities from Antarctic Deep Lake, sample 36m 3.0um, 0.8um, 0.1um pool (36m 3, 0.8 and 0.1 um pool)                                                                                                | 2100351015 | Environmental   | Aquatic    | Freshwater                             | Lentic         | Limnetic zone | 313035      | 285 | 24.41 | 0.52 | 124388753 |
| Sirex noctilio microbiome from Pennsylvania, sample of adult community (Adult June 2010 assembly)                                                                                                                          | 2100351016 | Host-associated | Arthropoda | Symbiotic fungal gardens and galleries | Fungus garden  | Unclassified  | 319145      | 286 | 21.12 | 0.44 | 177623549 |
| Freshwater microbial communities from Antarctic Deep Lake, sample 13m 0.1um (13m 0.1um 454 only)                                                                                                                           | 2100351014 | Environmental   | Aquatic    | Freshwater                             | Lentic         | Limnetic zone | 201266      | 287 | 20.17 | 0.54 | 80245247  |
| Bovine rumen viral communities from University of Illinois Dairy Farm in Urbana, IL, Cow rumen 7887 (Cow 7887)                                                                                                             | 2077657008 | Host-associated | Mammals    | Digestive system                       | Stomach        | unclassified  | 211242      | 288 | 12.05 | 0.41 | 73827693  |

Supplementary information

|                                                                                                                |            |                 |         |                  |              |              |        |     |       |      |           |
|----------------------------------------------------------------------------------------------------------------|------------|-----------------|---------|------------------|--------------|--------------|--------|-----|-------|------|-----------|
| Bovine rumen viral communities from University of Illinois Dairy Farm in Urbana, IL, Cow rumen 7664 (Cow 7664) | 2084038000 | Host-associated | Mammals | Digestive system | Stomach      | unclassified | 445555 | 289 | 10.52 | 0.42 | 153674931 |
| Water viral communities from Great Boiling Spring, Nevada (Water borne viral community)                        | 2058419004 | Environmental   | Aquatic | Thermal springs  | Unclassified | Unclassified | 74224  | 290 | 10.29 | 0.43 | 27375388  |
| Bovine rumen viral communities from University of Illinois Dairy Farm in Urbana, IL, Cow rumen 6993 (Cow 6993) | 2077657009 | Host-associated | Mammals | Digestive system | Stomach      | unclassified | 304432 | 291 | 9.8   | 0.37 | 100678798 |

**Supplementary Table 4****List of IMG plasmids used to assemble a combined PLASMID-IMG metagenome.**

| taxon_oid | Genome Name                                               | taxon_oid | Genome Name                                                              |
|-----------|-----------------------------------------------------------|-----------|--------------------------------------------------------------------------|
| 648934901 | 'Rehmannia glutinosa' phytoplasma plasmid pPARG1          | 646556923 | Lactococcus lactis SK11 plasmid pSK11B                                   |
| 640048201 | Acetobacter acetii plasmid pAC5                           | 640048385 | Lactococcus lactis UC509.9 plasmid pCIS3                                 |
| 640048202 | Acetobacter pasteurianus plasmid pAP12875                 | 640048392 | Lactococcus lactis W-1 plasmid pSRQ800                                   |
| 641507351 | Acetobacter pasteurianus plasmid pGR7                     | 640048393 | Lactococcus lactis W-37 plasmid pSRQ900                                  |
| 641210201 | Achromobacter denitrificans EST4002 plasmid pEST4011      | 641210327 | Lactococcus lactis cremoris 712 plasmid pAG6                             |
| 641210202 | Achromobacter xylooxidans A8 plasmid pA81                 | 640048398 | Lactococcus lactis cremoris Cremoris Wg2 plasmid pWVO2                   |
| 641210203 | Acidianus ambivalens Lei 10 plasmid pDL10                 | 640048396 | Lactococcus lactis cremoris HP plasmid pHP003                            |
| 643660901 | Acidianus hospitalis W1 plasmid pAH1                      | 640048397 | Lactococcus lactis cremoris NIZO B40 plasmid pNZ4000                     |
| 641210204 | Acidiphilium multivorum JCM8867 plasmid pAM5              | 640048395 | Lactococcus lactis cremoris P8-2-47 plasmid pBM02                        |
| 640048203 | Acidithiobacillus caldus F plasmid pTC-F14                | 642914165 | Lactococcus lactis diacetylactis DRC3 plasmid pNP40                      |
| 642914101 | Acidithiobacillus caldus MNG plasmid pTcM1                | 640048406 | Lactococcus lactis lactis BGMN1-5 plasmid pMN5                           |
| 640048205 | Acidithiobacillus ferrooxidans ATCC33020 plasmid pTF5     | 640048404 | Lactococcus lactis lactis IPLA 972 plasmid pBL1                          |
| 640048204 | Acidithiobacillus ferrooxidans MAL4-1 plasmid pTF4.1      | 641210329 | Lactococcus lactis lactis K214 plasmid pK214                             |
| 641210205 | Acinetobacter baumannii 19606 plasmid pMAC                | 641210326 | Lactococcus lactis lactis M127 plasmid pND324                            |
| 646556902 | Acinetobacter baumannii CU2 plasmid pMMCU2                | 640048463 | Lactococcus lactis lactis MJC15 plasmid pCD4                             |
| 645047301 | Acinetobacter baumannii VA-566/00 plasmid pABVA01         | 640048405 | Lactococcus lactis lactis UC317 plasmid pCI305                           |
| 642481201 | Acinetobacter baumannii plasmid pABIR                     | 641210328 | Lactococcus lactis lactis bv. diacetylactis DB0410 plasmid pDBORO        |
| 646556901 | Acinetobacter baumannii plasmid pMMA2                     | 640048403 | Lactococcus lactis lactis bv. diacetylactis DPC220 plasmid pAH82         |
| 645047302 | Acinetobacter calcoaceticus Acal H120-07 plasmid pMMCU1   | 640048399 | Lactococcus lactis lactis bv. diacetylactis DRC1 cryptic plasmid pDR1-1  |
| 640048206 | Acinetobacter sp. EB104 plasmid pAC450                    | 640048400 | Lactococcus lactis lactis bv. diacetylactis DRC1 cryptic plasmid pDR1-1B |
| 640048207 | Acinetobacter sp. SUN plasmid pRAY                        | 640048401 | Lactococcus lactis lactis bv. diacetylactis plasmid pS7a                 |
| 642481202 | Acinetobacter venetianus plasmid pAV1                     | 640048402 | Lactococcus lactis lactis bv. diacetylactis plasmid pS7b                 |
| 642481203 | Acinetobacter venetianus plasmid pAV2                     | 641210330 | Lactococcus lactis lactis plasmid pL2                                    |
| 640048208 | Actinobacillus actinomycetemcomitans plasmid pVT745       | 640048388 | Lactococcus lactis plasmid pCRL291.1                                     |
| 642914102 | Actinobacillus pleuropneumoniae 12494 plasmid p12494      | 640048481 | Lactococcus lactis plasmid pWC1                                          |
| 646556903 | Actinobacillus pleuropneumoniae APP11745 plasmid p11745   | 640048394 | Lactococcus lactis plasmid pWV01                                         |
| 642914103 | Actinobacillus pleuropneumoniae APPHB0503 plasmid pHB0503 | 648934922 | Lactococcus lactis subsp. lactis M14 plasmid pAR141                      |
| 641507352 | Actinobacillus pleuropneumoniae plasmid p9555             | 641210331 | Laribacter hongkongensis HLHK8 plasmid pHLHK8                            |
| 641507353 | Actinobacillus pleuropneumoniae plasmid p9956             | 642481238 | Laribacter hongkongensis plasmid pHLHK22                                 |
| 641210206 | Actinobacillus pleuropneumoniae plasmid pARD3079          | 642481239 | Leptolyngbya boryana plasmid pPBS1                                       |
| 641210207 | Actinobacillus pleuropneumoniae plasmid pKMA2425          | 640048407 | Leptolyngbya foveolarum M-43 plasmid pPF1                                |

## Supplementary information

|           |                                                             |           |                                                                |
|-----------|-------------------------------------------------------------|-----------|----------------------------------------------------------------|
| 641210208 | Actinobacillus pleuropneumoniae plasmid pMS260              | 640048408 | Leptolyngbya sp. PCC 6402 plasmid pRF1                         |
| 641210209 | Actinobacillus pleuropneumoniae plasmid pPSAS1522           | 641210332 | Leptospirillum ferrooxidans ATCC 49879 plasmid p49879.1        |
| 640048209 | Actinobacillus pleuropneumoniae plasmid pTYM1               | 641210333 | Leptospirillum ferrooxidans ATCC 49879 plasmid p49879.2        |
| 641210210 | Actinobacillus porcitonisillarum plasmid pIMD50             | 640048409 | Leuconostoc citreum 22R plasmid pLC22R                         |
| 641210211 | Actinobacillus porcitonisillarum plasmid pKMA1467           | 645047360 | Leuconostoc citreum C4 plasmid pCC3                            |
| 641210212 | Actinobacillus porcitonisillarum plasmid pKMA202            | 645047361 | Leuconostoc citreum C4 plasmid pFMBL1                          |
| 641210213 | Actinobacillus porcitonisillarum plasmid pKMA5              | 642914166 | Leuconostoc citreum plasmid pCB42                              |
| 641210214 | Actinobacillus porcitonisillarum plasmid pKMA505            | 642481240 | Leuconostoc citreum plasmid pCB42                              |
| 641210215 | Actinobacillus porcitonisillarum plasmid pKMA757            | 641210334 | Leuconostoc citreum plasmid pH01                               |
| 641210216 | Aeromonas bestiarum 5S9 plasmid pAb5S9                      | 640048465 | Leuconostoc lactis 533 plasmid pCI411                          |
| 648934902 | Aeromonas hydrophila plasmid pAH3680                        | 641210335 | Leuconostoc mesenteroides SY2 plasmid pFMBL1                   |
| 643660902 | Aeromonas hydrophila AO1 plasmid pBRST7.6                   | 641210336 | Leuconostoc mesenteroides Y110 plasmid pTXL1                   |
| 645047303 | Aeromonas hydrophila plasmid pRA1                           | 641210337 | Leuconostoc mesenteroides mesenteroides FR52 plasmid pFR18     |
| 642914104 | Aeromonas hydrophila plasmid pRA3                           | 650625520 | Listeria grayi DSM20601 plasmid pLGUG1                         |
| 641210217 | Aeromonas punctata HGB5 plasmid pFBAOT6                     | 648934923 | Listeria monocytogenes Lm1 plasmid pLM33                       |
| 640048210 | Aeromonas salmonicida plasmid pRAS3.2                       | 650625521 | Listeria monocytogenes SLCC2755 plasmid pLM1-2bUG1             |
| 641210218 | Aeromonas salmonicida salmonicida RSP 74.1 plasmid pAsal5   | 641210338 | Listonella anguillarum sv O1 775 plasmid pJM1                  |
| 640048214 | Aeromonas salmonicida salmonicida plasmid pAsal1            | 641210339 | Listonella anguillarum sv O2 plasmid pLO2                      |
| 640048215 | Aeromonas salmonicida salmonicida plasmid pAsal2            | 641210340 | Magnetospirillum gryphiswaldense MSR-1 plasmid                 |
| 640048216 | Aeromonas salmonicida salmonicida plasmid pAsal3            | 641210341 | Magnetospirillum magneticum MGT-1 plasmid pMGT                 |
| 640048217 | Aeromonas salmonicida salmonicida plasmid pRAS3.1           | 641210342 | Mannheimia haemolytica 3259 plasmid pCCK3259                   |
| 642914105 | Agrobacterium rhizogenes K599 plasmid pRi2659               | 640048410 | Mannheimia haemolytica R122 plasmid pMHSCS1                    |
| 640048218 | Agrobacterium rhizogenes MAFF03-01724 plasmid pRi1724       | 640048411 | Mannheimia varigena S131 plasmid pMVSCS1                       |
| 642914106 | Agrobacterium tumefaciens Bo542 plasmid Ti plasmid pTiBo542 | 640048412 | Marinococcus halophilus DSM 20408 plasmid pPL1                 |
| 640048221 | Agrobacterium tumefaciens C58 plasmid pTiC58                | 641210345 | Methanohalophilus mahii plasmid pML                            |
| 641210219 | Agrobacterium tumefaciens K84 plasmid pAgK84                | 640048414 | Methanosarcina acetivorans C2A plasmid pC2A                    |
| 640048220 | Agrobacterium tumefaciens MAFF301001 plasmid pTi-SAKURA     | 640048417 | Methanothermobacter thermautotrophicus Marburg plasmid pME2001 |
| 640048219 | Agrobacterium tumefaciens plasmid Ti                        | 640048415 | Methanothermobacter thermautotrophicus THF plasmid pFV1        |
| 642914108 | Amycolatopsis benzoatilytica DSM 43387 plasmid pA387        | 640048416 | Methanothermobacter thermautotrophicus Z-245 plasmid pFZ1      |
| 642914109 | Amycolatopsis mediterranei plasmid pMEA100                  | 640048418 | Methanothermobacter thermautotrophicus ZH3 plasmid pME2200     |
| 640048222 | Arcanobacterium pyogenes BBR1 plasmid pAP1                  | 640048419 | Methylophaga thalassica S1 plasmid pMTS1                       |
| 641210220 | Arcanobacterium pyogenes plasmid pAP2                       | 640048420 | Micrococcus luteus NCIMB 13267 plasmid pMLU1                   |
| 645047304 | Archaeoglobus profundus AV18; DSM 5631 plasmid pGS5         | 640048421 | Micrococcus sp. 28 plasmid pSD10                               |
| 645047305 | Arcobacter butzleri NCTC12481 plasmid unnamed               | 640048422 | Microcystis aeruginosa Kutzing plasmid pMA1                    |

## Supplementary information

|           |                                                           |           |                                                              |
|-----------|-----------------------------------------------------------|-----------|--------------------------------------------------------------|
| 641210221 | <i>Arthrobacter nitroguajacolicus</i> Rue61a plasmid pAL1 | 640048423 | <i>Microcystis aeruginosa</i> Kutzing plasmid pMA2           |
| 642481204 | <i>Arthrobacter</i> sp. AK-1 plasmid pSI-1                | 640048424 | <i>Microcystis aeruginosa</i> UV025 plasmid pMa025           |
| 642481205 | <i>Arthrobacter</i> sp. Chr15 plasmid pChr15              | 641210346 | <i>Micromonospora rosaria</i> plasmid pMR2                   |
| 640048223 | Aster yellows phytoplasma plasmid pJHW                    | 640048425 | <i>Microscilla</i> sp. PRE1 plasmid pSD15                    |
| 642914110 | <i>Avibacterium paragallinarum</i> A14 plasmid pYMH5      | 646556924 | <i>Moraxella bovis</i> ATCC 10900 plasmid pMbo4.6            |
| 648018801 | <i>Bacillus amyloliquefaciens</i> B3 plasmid pBSG3        | 642914167 | <i>Moraxella bovis</i> Epp63 plasmid pMBO-1                  |
| 640048226 | <i>Bacillus anthracis</i> A2012 (Florida isolate)         | 642914168 | <i>Moraxella bovis</i> Epp63 plasmid pMBO-2                  |
| 640048227 | <i>Bacillus anthracis</i> A2012 (Florida isolate)         | 642914169 | <i>Moraxella catarrhalis</i> E22 plasmid pLQ510              |
| 640048225 | <i>Bacillus anthracis</i> Pasteur plasmid pX02            | 641210347 | <i>Moraxella catarrhalis</i> plasmid pEMCJH03                |
| 640048224 | <i>Bacillus anthracis</i> Sterne plasmid pX01             | 642481241 | <i>Moraxella</i> sp. TA144 plasmid pTA144 Dw                 |
| 642914111 | <i>Bacillus cereus</i> AH187; F4810/72 plasmid pCER270    | 640048426 | <i>Moraxella</i> sp. TA144 plasmid pTA144 Up                 |
| 642914112 | <i>Bacillus cereus</i> AH818 plasmid pPER272              | 640048427 | <i>Mycobacterium avium</i> MD1 plasmid pVT2                  |
| 642914113 | <i>Bacillus cereus</i> AH820 plasmid pPER272              | 640048428 | <i>Mycobacterium celatum</i> 4 plasmid pCLP                  |
| 643660903 | <i>Bacillus cereus</i> G9241 plasmid pBC210               | 640048460 | <i>Mycobacterium fortuitum</i> plasmid pAL5000               |
| 643660904 | <i>Bacillus cereus</i> G9241 plasmid pBCXO1               | 643660931 | <i>Mycobacterium liflandii</i> 128FXT 128FXT plasmid pMUM002 |
| 650625501 | <i>Bacillus cereus</i> VPC1401 VPC1401 plasmid pLVP1401   | 640048429 | <i>Mycoplasma mycoides</i> unnamed plasmid                   |
| 640048461 | <i>Bacillus cereus</i> plasmid pBC16                      | 640048430 | <i>Mycoplasma</i> sp. bovine group 7 plasmid pBG7AU          |
| 645047306 | <i>Bacillus cereus</i> plasmid pPRS3a                     | 642914170 | <i>Mycoplasma yeatsii</i> GIH plasmid pMyBK1                 |
| 642914114 | <i>Bacillus coagulans</i> P4-102B plasmid pMSRO           | 642481242 | <i>Myxococcus fulvus</i> plasmid pMF1                        |
| 641210222 | <i>Bacillus licheniformis</i> 63.1 plasmid pBL63.1        | 641210349 | <i>Natrinema</i> sp. CX2021 plasmid pZMX201                  |
| 641210223 | <i>Bacillus licheniformis</i> FL5 plasmid pFL5            | 641210350 | <i>Natronobacterium</i> sp. AS-7091 plasmid pNB101           |
| 641210224 | <i>Bacillus licheniformis</i> FL7 plasmid pFL7            | 643660932 | <i>Neisseria gonorrhoeae</i> plasmid pCmGFP                  |
| 641507354 | <i>Bacillus megaterium</i> QM B1551 plasmid pBM100        | 648018809 | <i>Neisseria gonorrhoeae</i> 5289 plasmid pEP5289            |
| 641507355 | <i>Bacillus megaterium</i> QM B1551 plasmid pBM200        | 640048432 | <i>Neisseria gonorrhoeae</i> GC1-182 plasmid pJD4            |
| 641507356 | <i>Bacillus megaterium</i> QM B1551 plasmid pBM300        | 640048431 | <i>Neisseria gonorrhoeae</i> plasmid pJD1                    |
| 640048228 | <i>Bacillus megaterium</i> QM B1551 plasmid pBM400        | 642914171 | <i>Neisseria gonorrhoeae</i> plasmid pSJ5.2                  |
| 641210225 | <i>Bacillus methanolicus</i> MGA3 plasmid pBM19           | 642914172 | <i>Neisseria lactamica</i> 102739 plasmid pNL11              |
| 641210227 | <i>Bacillus mycoides</i> DX plasmid pBMYdx                | 642914173 | <i>Neisseria lactamica</i> 3207487 plasmid pNL3.1            |
| 641210228 | <i>Bacillus mycoides</i> Dxx plasmid pDx14.2              | 642914174 | <i>Neisseria lactamica</i> 3207487 plasmid pNL3.2            |
| 641210229 | <i>Bacillus mycoides</i> Sinv plasmid pSin9.7             | 642914175 | <i>Neisseria lactamica</i> 410838 plasmid pNL18.1            |
| 641210226 | <i>Bacillus mycoides</i> sin96 plasmid pBMY1              | 642914176 | <i>Neisseria lactamica</i> 410838 plasmid pNL18.2            |
| 640048229 | <i>Bacillus pumilus</i> ATCC 12140 plasmid pPL10          | 642914177 | <i>Neisseria lactamica</i> 5279613 plasmid pNL14             |
| 640048230 | <i>Bacillus pumilus</i> ATCC 7065 plasmid pPL7065         | 642914178 | <i>Neisseria lactamica</i> 750149 plasmid pNL750149          |
| 646556905 | <i>Bacillus pumilus</i> ZZ84 plasmid pPZZ84               | 642914179 | <i>Neisseria lactamica</i> 8101503 plasmid pNL9              |
| 640048231 | <i>Bacillus</i> sp. B-3 plasmid pA01                      | 642914180 | <i>Neisseria lactamica</i> 811778 plasmid pNL15              |
| 648018802 | <i>Bacillus</i> sp. BS-01 BS-01 plasmid pBS-01            | 642914181 | <i>Neisseria lactamica</i> 871104 plasmid pNL871104          |
| 650625502 | <i>Bacillus</i> sp. BS-02 BS-02 plasmid pBS-02            | 642914182 | <i>Neisseria lactamica</i> 9225393 plasmid pNL7.1            |
| 650625503 | <i>Bacillus</i> sp. JAMB750 JAMB750 plasmid pJAM1         | 642914183 | <i>Neisseria lactamica</i> 932024 plasmid pNL932024          |

## Supplementary information

|           |                                                                     |           |                                                          |
|-----------|---------------------------------------------------------------------|-----------|----------------------------------------------------------|
| 641210230 | Bacillus sphaericus plasmid pLG                                     | 642481243 | Neisseria lactamica plasmid pNL01                        |
| 646556906 | Bacillus subtilis ATCC 15841 plasmid pPL1                           | 640048433 | Neisseria meningitidis 537 plasmid pJS-B                 |
| 640048233 | Bacillus subtilis IAM1028 plasmid pTA1015                           | 640048437 | Nitrosomonas sp. ENI-11 plasmid pAYL                     |
| 640048234 | Bacillus subtilis IAM1232 plasmid pTA1040                           | 640048438 | Nitrosomonas sp. ENI-11 plasmid pAYS                     |
| 640048235 | Bacillus subtilis IF03022 plasmid pTA1060                           | 646556925 | Nocardia aobensis plasmid pYS1                           |
| 640048232 | Bacillus subtilis plasmid p1414                                     | 642914184 | Nocardia sp. 107 plasmid pXT107                          |
| 641210231 | Bacillus subtilis plasmid pBS608                                    | 646556926 | Nocardia sp. C-14-1 plasmid pC1                          |
| 640048469 | Bacillus subtilis plasmid pIM13                                     | 648018810 | Nocardiopsis sp. 90127 plasmid pSQ10                     |
| 641210232 | Bacillus subtilis plasmid pLS30                                     | 641210351 | Nostoc sp. PCC 7524 plasmid pDU1                         |
| 640048237 | Bacillus thuringiensis 4Q2 plasmid pTX14-2                          | 640048439 | Novosphingobium aromaticivorans F199 plasmid pNL1        |
| 641210234 | Bacillus thuringiensis H1.1 plasmid pGI3                            | 642914185 | Ochrobactrum anthropi W24; CGMCC 1649 plasmid pW240      |
| 641210233 | Bacillus thuringiensis HD-3a3b miniplasmid                          | 641210352 | Oenococcus oeni plasmid pOM1                             |
| 641210235 | Bacillus thuringiensis K1 plasmid pK1S1                             | 640048440 | Oenococcus oeni plasmid pRS2                             |
| 641507357 | Bacillus thuringiensis YBT-1520 plasmid pBMB67                      | 640048441 | Oenococcus oeni plasmid pRS3                             |
| 643660905 | Bacillus thuringiensis YBT-1520 plasmid pBMB7635                    | 641210353 | Oligotropha carboxidovorans OM5 - DSM 1227 plasmid pHCG3 |
| 640048236 | Bacillus thuringiensis YBT-1520 plasmid pBMB9741                    | 645047364 | Onion yellows phytoplasma OY plasmid EcoYW1              |
| 642481206 | Bacillus thuringiensis plasmid pDAN-involved                        | 645047365 | Onion yellows phytoplasma OY plasmid pOYIM               |
| 642481207 | Bacillus thuringiensis plasmid pFR12                                | 645047366 | Onion yellows phytoplasma OY plasmid pOYNIM              |
| 642481208 | Bacillus thuringiensis plasmid pFR12.5                              | 641210354 | Onion yellows phytoplasma plasmid extrachromosomal DNA   |
| 642481209 | Bacillus thuringiensis plasmid pFR55                                | 643660933 | Ornithobacterium rhinotracheale plasmid pOR1             |
| 642481210 | Bacillus thuringiensis serovar kurstaki plasmid pAW63               | 642914186 | Paenibacillus larvae 67E plasmid pMA67                   |
| 641210236 | Bacillus thuringiensis sv darmstadiensis INTA 14-4 plasmid pBMBt1   | 642914187 | Paenibacillus popilliae NRRL B-2524 plasmid pBP68        |
| 640048239 | Bacillus thuringiensis sv entomocidus LBIT-113 plasmid pUIBI-1      | 648934924 | Pantoea agglomerans EGE6 plasmid pPAGA3                  |
| 640048238 | Bacillus thuringiensis sv israelensis HI4 plasmid pTX14-3           | 640048444 | Pantoea citrea 1056R plasmid pUCD5000                    |
| 641507358 | Bacillus thuringiensis sv israelensis plasmid pBtoxis               | 640048443 | Pantoea citrea ATCC31623 plasmid pPZG500                 |
| 640048242 | Bacillus thuringiensis sv israelensis plasmid pTX14-1               | 642914188 | Paracoccus aminophilus JCM 7686 plasmid pAMI2            |
| 640048240 | Bacillus thuringiensis sv kurstaki YBT-1520 plasmid pBMB2062        | 646556927 | Paracoccus aminophilus JCM 7686 plasmid pAMI3            |
| 642914115 | Bacillus thuringiensis sv tenebrionis YBT-1765 plasmid pBMB175      | 650625522 | Paracoccus aminophilus JCM 7686 plasmid pAMI7            |
| 640048241 | Bacillus thuringiensis sv thuringiensis H1.1 plasmid pGI1           | 641210355 | Paracoccus methylutens DM12 plasmid pMTH1                |
| 642914116 | Bacteroides fragilis P35 plasmid pBFP35                             | 640048445 | Paracoccus pantotrophus DSM 11072 plasmid pWKS1          |
| 640048243 | Bacteroides fragilis plasmid pBI143                                 | 643660934 | Pasteurella multocida plasmid pCCK1900                   |
| 641210237 | Bacteroides uniformis mobilizable transposon NBU1                   | 641210356 | Pasteurella multocida 381 plasmid pCCK381                |
| 640048244 | Bartonella grahamii WM10 plasmid pBGR2                              | 641210357 | Pasteurella multocida 6647 plasmid pCCK647               |
| 641210238 | Bartonella grahamii plasmid pBGR1                                   | 640048446 | Pasteurella multocida Pm1096 plasmid pIG1                |
| 642914117 | Bartonella tribocorum KM19-1 plasmid pKM19s                         | 645047367 | Pasteurella multocida plasmid pB1005                     |
| 641210239 | Beet leafhopper transmitted virescence phytoplasma plasmid pBLTVA-1 | 645047368 | Pasteurella multocida plasmid pB1006                     |



Supplementary information

|           |                                                                     |           |                                                             |
|-----------|---------------------------------------------------------------------|-----------|-------------------------------------------------------------|
| 641210240 | Beet leafhopper transmitted virescence phytoplasma plasmid pBLTVA-2 | 640048447 | Pasteurella multocida plasmid pJR1                          |
| 642914118 | Bifidobacterium asteroides DSM 20089 plasmid pCIBAO89               | 640048448 | Pasteurella multocida plasmid pJR2                          |
| 643660906 | Bifidobacterium bifidum B80 plasmid pB80                            | 641210358 | Pasteurella trehalosi 13698 plasmid pCCK13698               |
| 642914119 | Bifidobacterium breve B21a plasmid pB21a                            | 642481245 | Paulownia witches-broom phytoplasma plasmid pPaWBny-1       |
| 640048245 | Bifidobacterium breve NCFB 2258 plasmid pCIBb1                      | 642481246 | Paulownia witches-broom phytoplasma plasmid pPaWBny-2       |
| 641210241 | Bifidobacterium catenulatum L48 plasmid pBC1                        | 640048449 | Peanut witches-broom phytoplasma plasmid pPNWB              |
| 642914120 | Bifidobacterium longum DPC6043 plasmid p6043A                       | 643660935 | Pectobacterium atrosepticum SCRI1039 plasmid pECA1039       |
| 642914121 | Bifidobacterium longum DPC6043 plasmid p6043B                       | 640048450 | Pediococcus acidilactici H plasmid pSMB74                   |
| 642914122 | Bifidobacterium longum FI10564 plasmid pFI2576                      | 642914189 | Pediococcus acidilactici NCIMB 6990 plasmid pEOC01          |
| 640048250 | Bifidobacterium longum KJ plasmid pKJ36                             | 641210359 | Pediococcus damnosus 8801 plasmid pF8801                    |
| 640048251 | Bifidobacterium longum KJ plasmid pKJ50                             | 648934925 | Pediococcus pentosaceus ACA-DC 3431 plasmid pPS1            |
| 640048246 | Bifidobacterium longum RW041 plasmid PNAC2                          | 640048451 | Pediococcus pentosaceus ATCC43200 plasmid pMD136            |
| 640048253 | Bifidobacterium longum RW041 plasmid pNAC3                          | 645047369 | Pediococcus pentosaceus plasmid pRS5                        |
| 640048252 | Bifidobacterium longum RW048 plasmid pNAC1                          | 645047370 | Photobacterium damselaе piscicida P9014 plasmid pP9014      |
| 640048247 | Bifidobacterium longum VMKB44 plasmid pB44                          | 641210361 | Photobacterium damselaе piscicida PT99-018 plasmid pP99-018 |
| 641210242 | Bifidobacterium longum plasmid pMG1                                 | 641210360 | Photobacterium damselaе piscicida USA91278 plasmid pP91278  |
| 641210243 | Bifidobacterium longum plasmid pTB6                                 | 650625523 | Photobacterium damselaе subsp. damselaе plasmid pPHDD1      |
| 640048254 | Bifidobacterium pseudocatenulatum VMKB4M plasmid p4M                | 648018811 | Photobacterium damselaе subsp. piscicida plasmid pPHDP10    |
| 642914123 | Bifidobacterium pseudolongum globosum DPC479 plasmid pASV479        | 642481247 | Phytoplasma sp. plasmid pPSE                                |
| 643660907 | Bifidobacterium sp. A24 A24 plasmid pBIFA24                         | 646556928 | Planococcus sp. ZOYM plasmid pPCZ1                          |
| 642481211 | Birmingham IncP-alpha plasmid                                       | 646556929 | Planococcus sp. ZOYM plasmid pPCZ2                          |
| 641210244 | Bordetella pertussis BP136 plasmid pBP136                           | 641210362 | Plasmid QKH54                                               |
| 645047307 | Borrelia burgdorferi 297 plasmid 297_lp54                           | 641210363 | Plasmid pB3                                                 |
| 645047308 | Borrelia burgdorferi JD1 plasmid JD1_lp54                           | 648018812 | Plasmid pGNB2 plasmid pGNB2                                 |
| 645047309 | Borrelia burgdorferi N40 plasmid N40_lp54                           | 640048471 | Plasmid pIPO2T                                              |
| 640048256 | Borrelia burgdorferi plasmid cp18-2                                 | 641210364 | Plasmid pLB1                                                |
| 640048257 | Borrelia burgdorferi strain ATCC 35210 plasmid lp16.9               | 642481248 | Plasmid pNKH43                                              |
| 641210245 | Borrelia burgdorferi strain lp21 plasmid                            | 640048482 | Pleurotus ostreatus mitochondrial plasmid mlp1              |
| 641210246 | Borrelia duttonii 44-kb linear plasmid                              | 640048485 | Prevotella ruminicola T31 plasmid pRAM4                     |
| 640048259 | Brevibacillus borstelensis HP926 plasmid pHT926                     | 640048486 | Propionibacterium acidipropionici E214 plasmid pRGO1        |
| 640048260 | Brevibacterium linens plasmid LIM                                   | 640048487 | Propionibacterium freudenreichii LMG16545 plasmid p545      |
| 640048263 | Buchnera aphidicola Dn plasmid pLeu-Dn                              | 641507374 | Propionibacterium freudenreichii plasmid pLME108            |
| 640048262 | Buchnera aphidicola Ps plasmid pBPS1                                | 640048488 | Propionibacterium granulosum PF283 cryptic plasmid pPG01    |

Supplementary information

|           |                                                         |           |                                                              |
|-----------|---------------------------------------------------------|-----------|--------------------------------------------------------------|
| 640048261 | Buchnera aphidicola Sg plasmid pLeu-Sg                  | 641210365 | Propionibacterium jensenii DF1 plasmid pLME106               |
| 646556907 | Buchnera aphidicola plasmid pleu-BTg                    | 643660936 | Proteus mirabilis plasmid pRPCM Y                            |
| 646556908 | Burkholderia cepacia 2a plasmid pIJB1                   | 640048490 | Proteus vulgaris ATCC13315 plasmid pPvu1                     |
| 641507359 | Burkholderia cepacia plasmid PPC1                       | 640048489 | Proteus vulgaris UR-75 plasmid Rts1                          |
| 643660908 | Butyrivibrio fibrisolvens plasmid pRJF1                 | 642914191 | Providencia rettgeri plasmid R7K                             |
| 643660909 | Butyrivibrio fibrisolvens plasmid pRJF2                 | 642914192 | Pseudoalteromonas sp. 643A plasmid pKW1                      |
| 640048264 | Butyrivibrio fibrisolvens Bu49 plasmid pOM1             | 646556930 | Pseudoalteromonas sp. BSi20327 plasmid pSM327                |
| 641210247 | Caedibacter taeniospiralis plasmid pKAP298              | 640048491 | Pseudoalteromonas sp. PS1M3 plasmid pPS1M3                   |
| 641210248 | Campylobacter coli 338 plasmid p3384                    | 641210368 | Pseudomonas aeruginosa 07-406 plasmid pMATVIM-7              |
| 641210249 | Campylobacter coli 338 plasmid p3386                    | 642914193 | Pseudomonas aeruginosa E1 plasmid pMM1                       |
| 641210253 | Campylobacter coli CC31 plasmid pCC31                   | 641210366 | Pseudomonas aeruginosa Ps142 plasmid Rms149                  |
| 641210250 | Campylobacter coli RM2228 plasmid pCC2228-1             | 641210367 | Pseudomonas aeruginosa plasmid pBS228                        |
| 641210251 | Campylobacter coli RM2228 plasmid pCC2228-2             | 641210369 | Pseudomonas alcaligenes NCIB 9867 plasmid pRA2               |
| 641210252 | Campylobacter coli RM2228 plasmid pCC2228-3             | 645047372 | Pseudomonas fluorescens PC20 plasmid pNAH20                  |
| 642914125 | Campylobacter fetus venerealis 4111/108 plasmid pCFV108 | 640048492 | Pseudomonas fulva IF-4 plasmid pN110                         |
| 640048370 | Campylobacter fetus venerealis Azul-94                  | 648934926 | Pseudomonas putida HS1 plasmid pDK1                          |
| 641210254 | Campylobacter jejuni 21190 plasmid pCJ01                | 641210372 | Pseudomonas putida MT53 plasmid pWW53                        |
| 641210255 | Campylobacter jejuni RM1170 plasmid pCJ1170             | 640048493 | Pseudomonas putida NCIB 9816-4 plasmid pDTG1                 |
| 640048265 | Campylobacter jejuni plasmid pCJ419                     | 640048494 | Pseudomonas putida P8 plasmid pPP81                          |
| 641507360 | Campylobacter jejuni plasmid pTet (img:a)               | 645047373 | Pseudomonas putida W2 plasmid pW2                            |
| 641507361 | Campylobacter jejuni plasmid pTet (img:b)               | 640048495 | Pseudomonas putida mt-2 plasmid pWW0                         |
| 641507362 | Campylobacter jejuni plasmid pVir                       | 641210371 | Pseudomonas putida plasmid NAH7                              |
| 641210259 | Campylobacter lari 237 plasmid pUPTC237                 | 640048496 | Pseudomonas putida plasmid pYQ39                             |
| 641210258 | Campylobacter lari 300 plasmid pCL300                   | 640048497 | Pseudomonas resinovorans CA10 plasmid pCAR1                  |
| 642914126 | Candidatus Phytoplasma australiense plasmid pCPa        | 643660937 | Pseudomonas resinovorans CA10 plasmid pCAR1.2                |
| 642914127 | Candidatus Phytoplasma australiense plasmid pPAPh2      | 640048498 | Pseudomonas sp. ADP plasmid pADP-1                           |
| 642914128 | Candidatus Phytoplasma australiense plasmid pPASb11     | 645047374 | Pseudomonas sp. CG21 CG21 plasmid pMWHK01                    |
| 648018803 | Candidatus Rickettsia amblyommii Aar/SC plasmid pRAM18  | 642914194 | Pseudomonas sp. CT14 plasmid pCT14                           |
| 648018804 | Candidatus Rickettsia amblyommii Aar/SC plasmid pRAM23  | 641210373 | Pseudomonas sp. ND6 plasmid pND6-1                           |
| 643660910 | Capnocytophaga canimorsus 7 plasmid pCC7                | 641210374 | Pseudomonas sp. S-47 plasmid p47L                            |
| 645047310 | Chlamydia trachomatis B/TZ1A828/OT plasmid pCTB         | 641210375 | Pseudomonas sp. S-47 plasmid p47S                            |
| 640048464 | Chlamydia trachomatis D plasmid pCHL1                   | 640048499 | Pseudomonas sp. SLT2001 plasmid pQBR55                       |
| 645047311 | Chlamydia trachomatis Jali20 plasmid pJALI              | 640048500 | Pseudomonas syringae maculicola M6 plasmid pFKN              |
| 645047312 | Chlamydia trachomatis Sweden2 plasmid pSW2              | 641210376 | Pseudomonas syringae pv. Maculicola ES4326 plasmid pPMA4326A |
| 645047313 | Chlamydia trachomatis Sweden3 plasmid pSW3              | 641210377 | Pseudomonas syringae pv. maculicola ES4326 plasmid pPMA4326B |
| 645047314 | Chlamydia trachomatis Sweden4 plasmid pSW4              | 641210378 | Pseudomonas syringae pv. maculicola ES4326 plasmid pPMA4326C |

Supplementary information

|           |                                                                |           |                                                                            |
|-----------|----------------------------------------------------------------|-----------|----------------------------------------------------------------------------|
| 645047315 | <i>Chlamydia trachomatis</i> Sweden5 plasmid pSW5              | 641210379 | <i>Pseudomonas syringae</i> pv. <i>maculicola</i> ES4326 plasmid pPMA4326D |
| 641507363 | <i>Chlamydia trachomatis</i> plasmid pLGV440                   | 641210380 | <i>Pseudomonas syringae</i> pv. <i>maculicola</i> ES4326 plasmid pPMA4326E |
| 640048267 | <i>Chlamydomydia psittaci</i> plasmid pCpA1                    | 641210381 | <i>Pseudomonas syringae</i> pv. <i>syringae</i> A2 plasmid pPSR1           |
| 640048268 | <i>Chlorobium limicola</i> DSM 249 plasmid pCL1                | 650625525 | <i>Pseudonocardia autotrophica</i> DSM 43082 plasmid pPA43082              |
| 640048270 | <i>Citrobacter rodentium</i> DBS100 plasmid pCRP3              | 648018813 | <i>Pyrococcus</i> sp. 12/1 12/1 plasmid pP12-1                             |
| 640048269 | <i>Citrobacter rodentium</i> DBS100 plasmid pCRP3              | 640048501 | <i>Pyrococcus</i> sp. JT1 plasmid pRT1                                     |
| 645047316 | <i>Clostridium botulinum</i> D 1873 plasmid pCLG1              | 641210382 | <i>Rahnella</i> sp. WMR15 plasmid pHW15                                    |
| 645047317 | <i>Clostridium botulinum</i> D 1873 plasmid pCLG2              | 642481250 | <i>Ralstonia pickettii</i> plasmid pMBCP                                   |
| 645047318 | <i>Clostridium butyricum</i> MIYAIRI 588 plasmid pCBM588       | 640048502 | <i>Ralstonia solanacearum</i> M4S plasmid pJTSP1                           |
| 650625504 | <i>Clostridium carboxidivorans</i> P7 P7 plasmid p19           | 640048504 | <i>Rhodobacter blasticus</i> TCRI-14 plasmid pMG160                        |
| 641210260 | <i>Clostridium difficile</i> CD6 plasmid pCD6                  | 642914195 | <i>Rhodococcus aetherivorans</i> I24 plasmid pRA1                          |
| 641210262 | <i>Clostridium perfringens</i> F4969 plasmid pCPF4969          | 640048505 | <i>Rhodococcus equi</i> 103 plasmid p103                                   |
| 641210261 | <i>Clostridium perfringens</i> F5603 plasmid pBCNF5603         | 642914196 | <i>Rhodococcus equi</i> 103S plasmid pVAPA1037                             |
| 641210263 | <i>Clostridium perfringens</i> F5603 plasmid pCPF5603          | 640048506 | <i>Rhodococcus equi</i> ATCC33701 plasmid pREAT701                         |
| 643660911 | <i>Clostridium perfringens</i> NCTC 8533B4D plasmid pCP8533etx | 642914197 | <i>Rhodococcus equi</i> PAM1593 plasmid pVAPB1593                          |
| 642914129 | <i>Clostridium perfringens</i> plasmid pCW3                    | 640048507 | <i>Rhodococcus erythropolis</i> BD2 plasmid pBD2                           |
| 640048470 | <i>Clostridium perfringens</i> plasmid pIP404                  | 641210389 | <i>Rhodococcus erythropolis</i> DSM 8424 plasmid pRE8424                   |
| 640048271 | <i>Clostridium</i> sp. MCF-1 indigenous plasmid pMCF-1         | 640048508 | <i>Rhodococcus erythropolis</i> NI86/21 plasmid pFAJ2600                   |
| 642481214 | <i>Collimonas fungivorans</i> plasmid pTer331                  | 641210392 | <i>Rhodococcus rhodochrous</i> plasmid pNC500                              |
| 642914130 | <i>Comamonas</i> sp. CNB-1 plasmid pCNB                        | 640048509 | <i>Rhodococcus</i> sp. B264-1 plasmid pB264                                |
| 642481215 | <i>Comamonas testosteroni</i> plasmid pPT1                     | 642914198 | <i>Rhodococcus</i> sp. NS1 plasmid pNSL1                                   |
| 640048272 | <i>Corynebacterium callunae</i> ATCC 15991 plasmid pCC1        | 646556931 | <i>Rhodopseudomonas palustris</i> AS1.2352 plasmid pRPSZY                  |
| 642914132 | <i>Corynebacterium casei</i> JCM 12072 plasmid pCASE1          | 640048510 | <i>Rhodothermus marinus</i> plasmid pRM21                                  |
| 640048273 | <i>Corynebacterium diphtheriae</i> S601 plasmid pNG2           | 642914199 | <i>Rickettsia monacensis</i> IrR/Munich plasmid pRM                        |
| 640048274 | <i>Corynebacterium diphtheriae</i> plasmid pNGA2               | 640048511 | <i>Riemerella anatipestifer</i> 10 plasmid pCFC1                           |
| 640048287 | <i>Corynebacterium glutamicum</i> 1014 plasmid pXZ10142        | 640048512 | <i>Riemerella anatipestifer</i> 20 plasmid pCFC2                           |
| 640048285 | <i>Corynebacterium glutamicum</i> 1014 plasmid pXZ10145.1      | 641210393 | <i>Ruegeria</i> sp. PR1b plasmid pSD20                                     |
| 640048279 | <i>Corynebacterium glutamicum</i> 22220 plasmid pAG3           | 641210394 | <i>Ruegeria</i> sp. PR1b plasmid pSD25                                     |
| 640048286 | <i>Corynebacterium glutamicum</i> 227 plasmid pXZ608           | 641210395 | <i>Ruminococcus flavefaciens</i> R13e2 plasmid pBAW301                     |
| 640048280 | <i>Corynebacterium glutamicum</i> ATCC 13869 plasmid pAM330    | 640048513 | <i>Salmonella choleraesuis</i> 79500 plasmid pSFD10                        |
| 646556909 | <i>Corynebacterium glutamicum</i> ATCC 14997 plasmid pCGR2     | 645047375 | <i>Salmonella enterica</i> AM04528 plasmid pAM04528                        |
| 640048283 | <i>Corynebacterium glutamicum</i> ATCC 19223 plasmid pSR1      | 641210397 | <i>Salmonella enterica</i> OU7025 plasmid pOU1113                          |
| 640048281 | <i>Corynebacterium glutamicum</i> ATCC 31832 plasmid pCG2      | 645047376 | <i>Salmonella enterica</i> SGI-15 plasmid pSGI15                           |
| 640048278 | <i>Corynebacterium glutamicum</i> ATCC31830 R-plasmid pCG4     | 645047377 | <i>Salmonella enterica enterica</i> sv 404ty plasmid pBSSB1                |
| 640048282 | <i>Corynebacterium glutamicum</i> LP-6 plasmid pGA2            | 640048514 | <i>Salmonella enterica enterica</i> sv Berta plasmid pBERT                 |

Supplementary information

|           |                                                                     |           |                                                                                          |
|-----------|---------------------------------------------------------------------|-----------|------------------------------------------------------------------------------------------|
| 640048284 | <i>Corynebacterium glutamicum</i> LP-6 plasmid pTET3                | 640048515 | <i>Salmonella enterica enterica</i> sv Choleraesuis RF-1 plasmid pKDSC50                 |
| 640048277 | <i>Corynebacterium glutamicum</i> YS-314 R-plasmid pAG1             | 641210398 | <i>Salmonella enterica enterica</i> sv Choleraesuis cryptic                              |
| 642481216 | <i>Corynebacterium glutamicum</i> plasmid pBI1                      | 642914200 | <i>Salmonella enterica enterica</i> sv Dublin plasmid IncW pIE321                        |
| 642481217 | <i>Corynebacterium glutamicum</i> unnamed plasmid                   | 642914201 | <i>Salmonella enterica enterica</i> sv Enteritidis Sal550 plasmid pSE34                  |
| 640048288 | <i>Corynebacterium jeikeium</i> A501 plasmid pA501                  | 645047378 | <i>Salmonella enterica enterica</i> sv GSS-HN-2007057 plasmid p2007057                   |
| 640048289 | <i>Corynebacterium jeikeium</i> A505 plasmid pA505                  | 642914202 | <i>Salmonella enterica enterica</i> sv Kentucky CVM29188 plasmid pCVM29188_101           |
| 640048290 | <i>Corynebacterium jeikeium</i> B85766 plasmid pB85766              | 642914203 | <i>Salmonella enterica enterica</i> sv Kentucky CVM29188 plasmid pCVM29188_146           |
| 640048291 | <i>Corynebacterium jeikeium</i> CJ84 plasmid pCJ84                  | 642914204 | <i>Salmonella enterica enterica</i> sv Kentucky CVM29188 plasmid pCVM29188_46            |
| 640048293 | <i>Corynebacterium jeikeium</i> K64 plasmid pK64                    | 642914205 | <i>Salmonella enterica enterica</i> sv Paratyphi A plasmid pGY1                          |
| 640048292 | <i>Corynebacterium jeikeium</i> plasmid pK43                        | 645047379 | <i>Salmonella enterica enterica</i> sv SL491 plasmid pSL491_3                            |
| 640048294 | <i>Corynebacterium renale</i> plasmid pCR1                          | 645047380 | <i>Salmonella enterica enterica</i> sv SL491 plasmid pSL491_5                            |
| 641210264 | <i>Corynebacterium</i> sp. L2-79-05 plasmid pLEW279a                | 642914206 | <i>Salmonella enterica enterica</i> sv Typhimurium ST728/06-2 plasmid pST728/06-2        |
| 641210265 | <i>Corynebacterium</i> sp. L2-79-05 plasmid pLEW279b                | 640048516 | <i>Salmonella enterica enterica</i> sv enteritidis plasmid pB                            |
| 640048295 | <i>Corynebacterium striatum</i> M82B plasmid pTP10                  | 640048517 | <i>Salmonella enterica enterica</i> sv enteritidis plasmid pC                            |
| 650625505 | <i>Corynebacterium tuberculostearicum</i> B146 plasmid p1B146       | 640048518 | <i>Salmonella enterica enterica</i> sv enteritidis plasmid pK                            |
| 642914133 | <i>Coxiella burnetii</i> MSU Goat Q177 plasmid QpRS                 | 640048519 | <i>Salmonella enterica enterica</i> sv enteritidis plasmid pP                            |
| 640048297 | <i>Coxiella burnetii</i> Nine Mile phase I plasmid QpH1             | 648934927 | <i>Salmonella enterica</i> subsp. <i>enterica</i> serovar plasmid pYT1                   |
| 640048296 | <i>Coxiella burnetii</i> R1140 plasmid QpDV                         | 643660938 | <i>Salmonella enterica</i> subsp. <i>enterica</i> serovar 05-686 plasmid pWES-1          |
| 642914134 | <i>Cupriavidus taiwanensis</i> TJ86 plasmid pTJ86-1                 | 642481251 | <i>Salmonella enterica</i> subsp. <i>enterica</i> serovar Brandenburg plasmid            |
| 642914135 | <i>Cupriavidus taiwanensis</i> TJ86 plasmid pTJ86-2                 | 646556932 | <i>Salmonella enterica</i> subsp. <i>enterica</i> serovar D23580 plasmid pSLT-BT         |
| 642914136 | <i>Cylindrospermum</i> sp. A1345 plasmid pCYLM01                    | 642481252 | <i>Salmonella enterica</i> subsp. <i>enterica</i> serovar Dublin plasmid pOU1114         |
| 642914137 | <i>Cylindrospermum</i> sp. A1345 plasmid pCYLM02                    | 642481253 | <i>Salmonella enterica</i> subsp. <i>enterica</i> serovar Dublin plasmid pOU1115         |
| 643660912 | <i>Deinococcus radiopugnans</i> ATCC 19172 ATCC 19172 plasmid pUE30 | 642481254 | <i>Salmonella enterica</i> subsp. <i>enterica</i> serovar Newport plasmid pA172          |
| 640048298 | <i>Delftia acidovorans</i> B plasmid pUO1                           | 648934928 | <i>Salmonella enterica</i> subsp. <i>enterica</i> serovar PVCM07-2008 plasmid pVCM04     |
| 640048299 | <i>Dichelobacter nodosus</i> plasmid DN1                            | 648018814 | <i>Salmonella enterica</i> subsp. <i>enterica</i> serovar SN11/00 plasmid pSN11/00Kan    |
| 640048303 | <i>Edwardsiella ictaluri</i> plasmid pEI1                           | 641507380 | <i>Salmonella enterica</i> subsp. <i>enterica</i> sv Dublin L-789 plasmid pMAK2          |
| 640048304 | <i>Edwardsiella ictaluri</i> plasmid pEI2                           | 641507378 | <i>Salmonella enterica</i> subsp. <i>enterica</i> sv Choleraesuis L-2454 plasmid pMAK1   |
| 650625506 | <i>Edwardsiella tarda</i> CK41 plasmid pCK41                        | 641507379 | <i>Salmonella enterica</i> subsp. <i>enterica</i> sv Choleraesuis OU7519 plasmid pOU7519 |
| 641210266 | <i>Eikenella corrodens</i> 1073 plasmid pMU1                        | 641507381 | <i>Salmonella enterica</i> subsp. <i>enterica</i> sv Dublin L-2156 plasmid pMAK3         |
| 640048531 | <i>Ensifer meliloti</i> 1132 plasmid pRm1132f                       | 641507382 | <i>Salmonella enterica</i> subsp. <i>enterica</i> sv Typhimurium DT193 plasmid           |
| 640048476 | <i>Ensifer meliloti</i> FP2 plasmid pSB102                          | 640048520 | <i>Salmonella typhi</i> plasmid R27                                                      |

## Supplementary information

|           |                                                         |           |                                                |
|-----------|---------------------------------------------------------|-----------|------------------------------------------------|
| 642914209 | Ensifer meliloti SM11 plasmid pSmeSM11b                 | 641210400 | Salmonella typhimurium G8430 plasmid pU302L    |
| 640048305 | Enterobacter aerogenes plasmid R751                     | 641210401 | Salmonella typhimurium G8430 plasmid pU302S    |
| 650625507 | Enterobacter cloacae plasmid pS51A                      | 640048357 | Salmonella typhimurium IncN plasmid R46        |
| 645047321 | Enterobacter cloacae CHE-2 plasmid pCHE-A               | 640048456 | Salmonella typhimurium Plasmid NTP16           |
| 643660913 | Enterobacter cloacae IFO 3320 plasmid pEC01             | 640048521 | Salmonella typhimurium plasmid R64             |
| 645047319 | Enterobacter cloacae plasmid pEC-IMP                    | 642914207 | Salmonella typhimurium plasmid pAnkS           |
| 645047320 | Enterobacter cloacae plasmid pEC-IMPQ                   | 640048522 | Salmonella typhimurium plasmid pSC101          |
| 640048306 | Enterobacter sp. RFL1396 plasmid pEsp1396               | 641210402 | Selenomonas ruminantium 19 plasmid pSRD191     |
| 643660914 | Enterococcus faecalis plasmid pMG2200                   | 648018815 | Selenomonas ruminantium 19 plasmid pSRD192     |
| 650625508 | Enterococcus faecalis plasmid pTW9                      | 640048526 | Selenomonas ruminantium HD4 plasmid pSR1       |
| 648934903 | Enterococcus faecalis plasmid pWZ1668                   | 640048523 | Selenomonas ruminantium JW13 plasmid pJW1      |
| 640048309 | Enterococcus faecalis BFE 1071 plasmid pEF1071          | 640048524 | Selenomonas ruminantium S20 plasmid pONE429    |
| 641210269 | Enterococcus faecalis DS16 conjugative transposon Tn916 | 640048525 | Selenomonas ruminantium S20 plasmid pONE430    |
| 640048308 | Enterococcus faecalis DS5 plasmid pAMalpha1             | 640048527 | Serratia entomophila A1MO2 plasmid pADAP       |
| 646556910 | Enterococcus faecalis DS5 plasmid pAMbeta1              | 642914208 | Serratia marcescens ACE4 plasmid pRK10         |
| 646556911 | Enterococcus faecalis E99 plasmid pBEE99                | 640048528 | Serratia marcescens plasmid R478               |
| 650625509 | Enterococcus faecalis EF-01 plasmid pEF-01              | 641210403 | Serratia marcescens plasmid R478               |
| 641210268 | Enterococcus faecalis RE25 plasmid pRE25                | 645047381 | Shewanella sp. 33B plasmid pSFKW33             |
| 640048307 | Enterococcus faecalis plasmid pAM373                    | 642481255 | Shigella flexneri 2a plasmid p2457TS2          |
| 641210267 | Enterococcus faecalis plasmid pCF10                     | 640048457 | Shigella flexneri 2b 222 plasmid R100          |
| 643660915 | Enterococcus faecium plasmid pMG1                       | 640048529 | Shigella flexneri 5a virulence plasmid pWR501  |
| 641210274 | Enterococcus faecium 399/F99/A9 plasmid pVEF2           | 646556933 | Shigella sonnei EG0356 plasmid pEG356          |
| 641210273 | Enterococcus faecium 399/F99/H8 plasmid pVEF1           | 640048454 | Shigella sonnei P9 plasmid ColIb-P9            |
| 642914138 | Enterococcus faecium 399/S99/A7 plasmid pVEF3           | 640048530 | Shigella sonnei colicin type 7 plasmid ColJc   |
| 642914139 | Enterococcus faecium 6T1a plasmid pEF1                  | 641210404 | Shigella sonnei plasmid pKKTET7                |
| 642914140 | Enterococcus faecium BM4147 plasmid pIP816              | 640048472 | Shigella sonnei plasmid pKYM                   |
| 641210270 | Enterococcus faecium L50 plasmid pClZ2                  | 646556934 | Sinorhizobium meliloti plasmid pSmeSM11a       |
| 650625510 | Enterococcus faecium S177 plasmid pS177                 | 641210405 | Sodalis glossinidius plasmid pSG1 (img:a)      |
| 640048310 | Enterococcus faecium U37 plasmid pRUM                   | 641210406 | Sodalis glossinidius plasmid pSG1 (img:b)      |
| 641210271 | Enterococcus faecium plasmid pHT beta                   | 641210407 | Sodalis glossinidius plasmid pSG2 (img:a)      |
| 641210272 | Enterococcus faecium plasmid pJB01                      | 641210408 | Sodalis glossinidius plasmid pSG2 (img:b)      |
| 642481220 | Enterococcus faecium plasmid pJS33                      | 641210409 | Sodalis glossinidius plasmid pSG3              |
| 642481221 | Enterococcus faecium plasmid pJS42                      | 641210410 | Sodalis glossinidius plasmid pSG4 (img:a)      |
| 642481222 | Enterococcus faecium plasmid pRI1                       | 641210411 | Sodalis glossinidius plasmid pSG4 (img:b)      |
| 641210275 | Erwinia amylovora Ea88 plasmid pEA29                    | 641210412 | Sphingobium yanoikuyae JCM 7371 plasmid pYAN-1 |
| 641210276 | Erwinia amylovora LebB66 plasmid pEL60                  | 641210413 | Sphingobium yanoikuyae JCM 7371 plasmid pYAN-2 |
| 641210277 | Erwinia amylovora UTRJ2 plasmid pEU30                   | 641210414 | Sphingomonas sp. A1 plasmid pA1                |
| 640048311 | Erwinia amylovora plasmid pEA1.7                        | 641210415 | Sphingomonas sp. KA1 plasmid pCAR3             |
| 640048312 | Erwinia amylovora plasmid pEA2.8                        | 648018816 | Sphingomonas sp. MM-1 MM-1 plasmid pISP3       |

Supplementary information

|           |                                                                 |           |                                                           |
|-----------|-----------------------------------------------------------------|-----------|-----------------------------------------------------------|
| 640048313 | <i>Erwinia pyrifoliae</i> plasmid pEP36                         | 641210416 | <i>Sphingomonas xenophaga</i> QYY plasmid pSx-Qyy         |
| 640048314 | <i>Erwinia</i> sp. Ejp 556 plasmid pEJ30                        | 650625526 | <i>Sphingopyxis macrogoltabida</i> 103 plasmid pSM103mini |
| 640048315 | <i>Erysipelothrix rhusiopathiae</i> plasmid pAP1                | 641210417 | <i>Spiroplasma citri</i> plasmid pBJS-O                   |
| 650625511 | <i>Escherichia coli</i> plasmid p3521                           | 641210418 | <i>Spiroplasma citri</i> plasmid pSci1                    |
| 642914141 | <i>Escherichia coli</i> 1520 plasmid pP1206                     | 641210419 | <i>Spiroplasma citri</i> plasmid pSci2                    |
| 641210301 | <i>Escherichia coli</i> 2001-10-678 plasmid pVI678              | 641210420 | <i>Spiroplasma citri</i> plasmid pSci3                    |
| 643660916 | <i>Escherichia coli</i> 278B plasmid pEC278                     | 641210421 | <i>Spiroplasma citri</i> plasmid pSci4                    |
| 640048321 | <i>Escherichia coli</i> 29k plasmid pECO29                      | 641210422 | <i>Spiroplasma citri</i> plasmid pSci5                    |
| 641210302 | <i>Escherichia coli</i> 517-2H1 plasmid pLEW517                 | 641210423 | <i>Spiroplasma citri</i> plasmid pSci6                    |
| 642914142 | <i>Escherichia coli</i> 53638 plasmid p53638_226                | 641210424 | <i>Spiroplasma citri</i> plasmid pSciA                    |
| 642914143 | <i>Escherichia coli</i> 53638 plasmid p53638_75                 | 641210425 | <i>Spiroplasma kunkelii</i> plasmid pSKU146               |
| 648934904 | <i>Escherichia coli</i> 7 plasmid IncQ-type pQ7                 | 648018817 | <i>Sporosarcina ureae</i> DMV4 plasmid pSU1               |
| 642914144 | <i>Escherichia coli</i> 86-24 plasmid pSP70                     | 643660939 | <i>Staphylococcus aureus</i> plasmid pC221                |
| 641210280 | <i>Escherichia coli</i> 9705 plasmid p9705                      | 643660940 | <i>Staphylococcus aureus</i> plasmid pRJ6                 |
| 645047323 | <i>Escherichia coli</i> A plasmid pEK499                        | 643660941 | <i>Staphylococcus aureus</i> plasmid pVGA                 |
| 641210281 | <i>Escherichia coli</i> A2363 plasmid pAPEC-O2-ColV             | 640048542 | <i>Staphylococcus aureus</i> 120-r plasmid pNVH01         |
| 641210282 | <i>Escherichia coli</i> A2363 plasmid pAPEC-O2-R                | 641210432 | <i>Staphylococcus aureus</i> CMRSA plasmid pWBG738        |
| 645047324 | <i>Escherichia coli</i> APEC O103 plasmid pAPEC-O103-ColBM      | 648018818 | <i>Staphylococcus aureus</i> E29 plasmid pDLK3            |
| 645047325 | <i>Escherichia coli</i> AR060302 plasmid pAR060302              | 646556935 | <i>Staphylococcus aureus</i> HUNSC491 plasmid pPR9        |
| 648934905 | <i>Escherichia coli</i> B24 plasmid pEC_B24                     | 641210429 | <i>Staphylococcus aureus</i> IMCJ1308 plasmid pSA1308     |
| 648934906 | <i>Escherichia coli</i> Bactec plasmid pEC_Bactec               | 641210430 | <i>Staphylococcus aureus</i> IMCJ1379 plasmid pSA1379     |
| 645047326 | <i>Escherichia coli</i> C plasmid pEK204                        | 642914210 | <i>Staphylococcus aureus</i> JY30 plasmid pKH20           |
| 648934907 | <i>Escherichia coli</i> C14-9 plasmid pEC14-9                   | 642914211 | <i>Staphylococcus aureus</i> JY37 plasmid pKH19           |
| 648934908 | <i>Escherichia coli</i> C159/11 plasmid pCT                     | 642914212 | <i>Staphylococcus aureus</i> JY43 plasmid pKH12           |
| 642914145 | <i>Escherichia coli</i> CA46 plasmid pColG                      | 642914213 | <i>Staphylococcus aureus</i> JY50 plasmid pKH21           |
| 645047327 | <i>Escherichia coli</i> D plasmid pEK516                        | 640048537 | <i>Staphylococcus aureus</i> SA5 plasmid pKH3             |
| 645047328 | <i>Escherichia coli</i> D7-3 plasmid pRAX                       | 648934929 | <i>Staphylococcus aureus</i> SK18 plasmid pSK1            |
| 641210298 | <i>Escherichia coli</i> DIJ1 plasmid pO86A1                     | 640048547 | <i>Staphylococcus aureus</i> TY4 plasmid pETB             |
| 641210278 | <i>Escherichia coli</i> DU1040 plasmid NR1                      | 640048546 | <i>Staphylococcus aureus</i> WBG1576 plasmid pUB101       |
| 643660917 | <i>Escherichia coli</i> E2348/69 plasmid p5217                  | 642914214 | <i>Staphylococcus aureus</i> WBG4364 plasmid pWBG1773     |
| 643660918 | <i>Escherichia coli</i> E2348/69 plasmid p6148                  | 646556936 | <i>Staphylococcus aureus</i> a53 plasmid pBORa53          |
| 642914146 | <i>Escherichia coli</i> E2348/69 plasmid pMAR7                  | 645047383 | <i>Staphylococcus aureus aureus</i> ST398 plasmid pKKS825 |
| 645047329 | <i>Escherichia coli</i> EC14 plasmid pEC14_114                  | 641507383 | <i>Staphylococcus aureus</i> plasmid EDINA                |
| 650625512 | <i>Escherichia coli</i> ED1a ED1a plasmid pECOED                | 640048532 | <i>Staphylococcus aureus</i> plasmid J3356::POX7;1        |
| 641210297 | <i>Escherichia coli</i> EH41 plasmid pO113                      | 640048533 | <i>Staphylococcus aureus</i> plasmid J3356::pOX7;3        |
| 648934909 | <i>Escherichia coli</i> ETEC 1392/75 ETEC 1392/75 plasmid p1081 | 640048534 | <i>Staphylococcus aureus</i> plasmid J3358                |
| 648934910 | <i>Escherichia coli</i> ETEC 1392/75 ETEC 1392/75 plasmid p557  | 642481256 | <i>Staphylococcus aureus</i> plasmid p21                  |
| 648934911 | <i>Escherichia coli</i> ETEC 1392/75 ETEC 1392/75 plasmid p746  | 640048535 | <i>Staphylococcus aureus</i> plasmid pC194                |
| 648934912 | <i>Escherichia coli</i> ETEC 1392/75 ETEC 1392/75 plasmid p75   | 640048536 | <i>Staphylococcus aureus</i> plasmid pC221                |

Supplementary information

|           |                                                  |           |                                                                |
|-----------|--------------------------------------------------|-----------|----------------------------------------------------------------|
| 646556912 | Escherichia coli ETEC H10407 plasmid pEntH10407  | 641210426 | Staphylococcus aureus plasmid pC223                            |
| 646556913 | Escherichia coli H22 plasmid pColE1-H22          | 641210427 | Staphylococcus aureus plasmid pE194                            |
| 645047330 | Escherichia coli H30 plasmid pO26-S1             | 645047382 | Staphylococcus aureus plasmid pGO1                             |
| 645047331 | Escherichia coli H30 plasmid pO26-S3             | 642481257 | Staphylococcus aureus plasmid pKH13                            |
| 645047332 | Escherichia coli H30 plasmid pO26-S4             | 642481258 | Staphylococcus aureus plasmid pKH14                            |
| 645047333 | Escherichia coli H30 plasmid pO26-Vir            | 642481259 | Staphylococcus aureus plasmid pKH15                            |
| 643660919 | Escherichia coli H30 plasmid pO26I               | 642481260 | Staphylococcus aureus plasmid pKH16                            |
| 645047334 | Escherichia coli H4H plasmid peH4H               | 642481261 | Staphylococcus aureus plasmid pKH17                            |
| 640048358 | Escherichia coli IncQ-like plasmid pIE1107       | 642481262 | Staphylococcus aureus plasmid pKH18                            |
| 645047335 | Escherichia coli J plasmid ColE9-J               | 640048538 | Staphylococcus aureus plasmid pKH6                             |
| 641210287 | Escherichia coli JEF100 plasmid pCoo             | 640048539 | Staphylococcus aureus plasmid pKH7                             |
| 640048455 | Escherichia coli K-12 CR63 plasmid F             | 640048540 | Staphylococcus aureus plasmid pLW043                           |
| 640048317 | Escherichia coli K-12 plasmid R721               | 640048541 | Staphylococcus aureus plasmid pMW2                             |
| 640048316 | Escherichia coli K12 P678-54 plasmid CloDF13     | 640048475 | Staphylococcus aureus plasmid pNS1                             |
| 640048322 | Escherichia coli KL4 plasmid pKL1                | 641210428 | Staphylococcus aureus plasmid pS194                            |
| 648934913 | Escherichia coli L46 plasmid pEC_L46             | 640048543 | Staphylococcus aureus plasmid pSK3                             |
| 648934914 | Escherichia coli L8 plasmid pEC_L8               | 640048544 | Staphylococcus aureus plasmid pSK41                            |
| 645047336 | Escherichia coli LF82 plasmid pLF82              | 640048545 | Staphylococcus aureus plasmid pSK6                             |
| 640048323 | Escherichia coli LG74 plasmid pLG13              | 641210431 | Staphylococcus aureus plasmid pSN2                             |
| 641210291 | Escherichia coli MG828 plasmid pMG828-1          | 640048477 | Staphylococcus aureus plasmid pT181                            |
| 641210292 | Escherichia coli MG828 plasmid pMG828-2          | 640048478 | Staphylococcus aureus plasmid pT48                             |
| 641210293 | Escherichia coli MG828 plasmid pMG828-3          | 642481263 | Staphylococcus aureus plasmid pTZ2162                          |
| 641210294 | Escherichia coli MG828 plasmid pMG828-4          | 641507384 | Staphylococcus aureus plasmid pTZ4                             |
| 641210295 | Escherichia coli MG828 plasmid pMG828-5          | 640048480 | Staphylococcus aureus plasmid pUB110 (img:a)                   |
| 646556914 | Escherichia coli MS2027 plasmid pMAS2027         | 640048479 | Staphylococcus aureus plasmid pUB110 (img:a)                   |
| 650625513 | Escherichia coli O102-ST405 plasmid pETN48       | 642481264 | Staphylococcus aureus plasmid pV030-8                          |
| 640048319 | Escherichia coli O111:NM B171 (EPEC2)            | 650625527 | Staphylococcus aureus subsp. aureus ST398 plasmid pKKS627      |
| 641210300 | Escherichia coli O157:H- 3072/96 plasmid pSFO157 | 641507385 | Staphylococcus aureus subsp. aureus USA300_TCH959 plasmid      |
| 646556915 | Escherichia coli O26:H- O6877 plasmid pO26-CRL   | 641210434 | Staphylococcus chromogenes KNS48 plasmid pLNU4                 |
| 648934915 | Escherichia coli ST131 plasmid pKC394            | 641210433 | Staphylococcus chromogenes TS1 plasmid pLNU1                   |
| 643660920 | Escherichia coli TN38148 plasmid pTN38148        | 641210435 | Staphylococcus chromogenes plasmid pLNU8 (naturally occurring) |
| 645047337 | Escherichia coli Vir68 plasmid pVir68            | 641210436 | Staphylococcus chromogenes plasmid pLNU9 (naturally occurring) |
| 641210299 | Escherichia coli W ATCC 9637 plasmid pRK2        | 640048548 | Staphylococcus epidermidis CH plasmid pSepCH                   |
| 646556916 | Escherichia coli ZMF18 plasmid pPM18             | 641210438 | Staphylococcus epidermidis SK398 plasmid pSK639                |
| 645047338 | Escherichia coli chi7122 plasmid pAPEC-1         | 641210437 | Staphylococcus epidermidis plasmid pLNU6 (naturally occurring) |
| 640048452 | Escherichia coli plasmid ColA                    | 640048474 | Staphylococcus epidermidis plasmid pNE131                      |
| 640048453 | Escherichia coli plasmid ColE1                   | 641210442 | Staphylococcus haemolyticus plasmid pLNU3                      |

## Supplementary information

|           |                                                                       |           |                                                                                     |
|-----------|-----------------------------------------------------------------------|-----------|-------------------------------------------------------------------------------------|
| 642481223 | <i>Escherichia coli</i> plasmid MccC7-H22                             | 641210443 | <i>Staphylococcus haemolyticus</i> plasmid pLNU7 (naturally occurring)              |
| 640048458 | <i>Escherichia coli</i> plasmid RSF1010                               | 650625528 | <i>Staphylococcus hyicus</i> plasmid pKKS966                                        |
| 640048318 | <i>Escherichia coli</i> plasmid p1658/97                              | 641210444 | <i>Staphylococcus lentus</i> plasmid pSTE2                                          |
| 641210279 | <i>Escherichia coli</i> plasmid p9123                                 | 640048549 | <i>Staphylococcus lugdunensis</i> 995 plasmid pLUG10                                |
| 641210283 | <i>Escherichia coli</i> plasmid pBHRK18                               | 641210445 | <i>Staphylococcus pasteurii</i> plasmid pSP187                                      |
| 641210284 | <i>Escherichia coli</i> plasmid pBHRK19                               | 641210446 | <i>Staphylococcus saprophyticus</i> plasmid pSES22                                  |
| 641210285 | <i>Escherichia coli</i> plasmid pC15-1a                               | 642914215 | <i>Staphylococcus sciuri</i> 101 plasmid pC194-like                                 |
| 640048320 | <i>Escherichia coli</i> plasmid pCol-let                              | 640048550 | <i>Staphylococcus sciuri</i> plasmid pSCFS1                                         |
| 645047322 | <i>Escherichia coli</i> plasmid pColE8                                | 641210447 | <i>Staphylococcus sciuri sciuri</i> plasmid pACK6                                   |
| 641210286 | <i>Escherichia coli</i> plasmid pColK-K235                            | 641210448 | <i>Staphylococcus simulans</i> 184/61 plasmid pLNU2                                 |
| 641210288 | <i>Escherichia coli</i> plasmid pFL129                                | 648018819 | <i>Staphylococcus simulans</i> bv. <i>staphylolyticus</i> NRRL B-2628 plasmid pACK1 |
| 641210289 | <i>Escherichia coli</i> plasmid pGAL1                                 | 650625529 | <i>Staphylococcus simulans</i> bv. <i>staphylolyticus</i> NRRL B-2628 plasmid pACK2 |
| 641210290 | <i>Escherichia coli</i> plasmid pGJC156                               | 648018820 | <i>Staphylococcus simulans</i> bv. <i>staphylolyticus</i> NRRL B-2628 plasmid pACK3 |
| 642914147 | <i>Escherichia coli</i> plasmid pGMS5                                 | 645047384 | <i>Staphylococcus simulans</i> bv. <i>staphylolyticus</i> NRRL B-2628 plasmid pACK4 |
| 642914148 | <i>Escherichia coli</i> plasmid pGRW12                                | 650625530 | <i>Staphylococcus simulans</i> bv. <i>staphylolyticus</i> NRRL B-2628 plasmid pACK5 |
| 642914149 | <i>Escherichia coli</i> plasmid pGWZ12                                | 641210449 | <i>Staphylococcus simulans</i> plasmid pLNU5 (naturally occurring)                  |
| 642481224 | <i>Escherichia coli</i> plasmid pIS2                                  | 641210450 | <i>Staphylococcus</i> sp. 693-2 plasmid pLEW6932                                    |
| 642481225 | <i>Escherichia coli</i> plasmid pLEW517                               | 648018821 | <i>Staphylococcus</i> sp. JG-2009f plasmid SAP_104B                                 |
| 641507364 | <i>Escherichia coli</i> plasmid pLMO226                               | 648018822 | <i>Staphylococcus</i> sp. SK85 SK85 plasmid SAP_108D                                |
| 641210296 | <i>Escherichia coli</i> plasmid pMUR050                               | 648018823 | <i>Staphylococcus</i> sp. SK939 SK939 plasmid SAP_106A                              |
| 642481226 | <i>Escherichia coli</i> plasmid pOLA52                                | 641210451 | <i>Staphylococcus warneri</i> ISK-1 plasmid pPI-1                                   |
| 642481227 | <i>Escherichia coli</i> plasmid pVM01                                 | 641210452 | <i>Staphylococcus warneri</i> ISK-1 plasmid pPI-2                                   |
| 641210303 | <i>Escherichia</i> sp. Sflu5 plasmid pAK51                            | 641210453 | <i>Staphylococcus warneri</i> plasmid pSW174                                        |
| 642914150 | <i>Exiguobacterium</i> sp. RFL1109 plasmid pEspA                      | 641210454 | <i>Staphylococcus warneri</i> plasmid pSW49                                         |
| 642914151 | <i>Exiguobacterium</i> sp. RFL1109 plasmid pEspB                      | 642481265 | <i>Stenotrophomonas maltophilia</i> plasmid pSH1                                    |
| 640048324 | <i>Flavobacterium psychrophilum</i> D12 plasmid pCP1                  | 642481266 | <i>Stenotrophomonas maltophilia</i> plasmid pSM76                                   |
| 642914152 | <i>Flavobacterium</i> sp. KI723T1 plasmid Plasmid pOAD2               | 640048551 | <i>Streptococcus agalactiae</i> plasmid pGB354                                      |
| 640048325 | <i>Flavobacterium</i> sp. KP1 plasmid pFL1                            | 640048552 | <i>Streptococcus agalactiae</i> plasmid pGB3631                                     |
| 641507365 | <i>Fluoribacter dumoffii</i> plasmid pLD-TEX-KL                       | 640048473 | <i>Streptococcus agalactiae</i> plasmid pLS1                                        |
| 645047339 | <i>Francisella philomiragia</i> ATCC 25016 plasmid pF242              | 641507386 | <i>Streptococcus agalactiae</i> plasmid pMV158                                      |
| 645047340 | <i>Francisella philomiragia philomiragia</i> ATCC 25017 plasmid pF243 | 642914216 | <i>Streptococcus dysgalactiae equisimilis</i> T132 plasmid pSdyT132                 |
| 640048326 | <i>Francisella tularensis</i> LVS plasmid pOM1                        | 642481267 | <i>Streptococcus dysgalactiae</i> subsp. <i>equisimilis</i> plasmid pW2580          |
| 640048327 | <i>Francisella tularensis novicida</i> F6168 plasmid pFNL10           | 640048553 | <i>Streptococcus mutans</i> LM7 plasmid pLM7                                        |
| 640048328 | <i>Frankia</i> sp. Cpl1 plasmid pFQ12                                 | 640048554 | <i>Streptococcus mutans</i> UA140 plasmid pUA140                                    |
| 640048331 | <i>Fusobacterium nucleatum</i> 12230 plasmid pFN1                     | 645047385 | <i>Streptococcus parasanguinis</i> plasmid pFW213                                   |
| 640048333 | <i>Fusobacterium nucleatum</i> FDC 27-17 plasmid pPA52                | 640048556 | <i>Streptococcus pneumoniae</i> A6011 plasmid pSMB1                                 |



Supplementary information

|           |                                                             |           |                                                       |
|-----------|-------------------------------------------------------------|-----------|-------------------------------------------------------|
| 640048332 | Fusobacterium nucleatum KH9 plasmid pKH9                    | 640048555 | Streptococcus pneumoniae D39 plasmid pDP1             |
| 641210304 | Fusobacterium nucleatum polymorphum ATCC 10953 plasmid pFN3 | 641210455 | Streptococcus pneumoniae plasmid pSpnP1               |
| 640048334 | Geobacillus stearothermophilus TKO15 plasmid pSTK1          | 641210456 | Streptococcus pyogenes 71-724 plasmid pDN571          |
| 642481229 | Geobacillus stearothermophilus plasmid pGS18                | 642481268 | Streptococcus pyogenes plasmid pDN281                 |
| 640048336 | Gluconobacter oxydans DSM 3504 plasmid pGO128               | 642481269 | Streptococcus pyogenes plasmid pRW35                  |
| 640048335 | Gluconobacter oxydans IFO 3171 plasmid pAG5                 | 641210457 | Streptococcus pyogenes plasmid pSM19035               |
| 641210305 | Gordonia westfalica DSM44215 plasmid pKB1                   | 640048557 | Streptococcus suis DAT1 plasmid pSSU1                 |
| 641210306 | Haemophilus ducreyi ATCC 27722 plasmid pNAD1                | 640048564 | Streptococcus thermophilus 2783 plasmid pt38          |
| 643660923 | Haemophilus influenzae plasmid ICEhin1056                   | 640048563 | Streptococcus thermophilus SMQ-172 plasmid pSMQ172    |
| 650625514 | Haemophilus influenzae BB1059 plasmid PB1000                | 641210458 | Streptococcus thermophilus SMQ-173 plasmid pSMQ173b   |
| 640048343 | Haemophilus influenzae aegyptius plasmid pF3031             | 640048559 | Streptococcus thermophilus ST135 plasmid pER35        |
| 640048342 | Haemophilus influenzae biotype aegyptius BPF plasmid pF3028 | 640048560 | Streptococcus thermophilus ST136 plasmid pER36        |
| 641210307 | Haemophilus influenzae biotype aegyptius plasmid pF1947     | 640048562 | Streptococcus thermophilus ST2-1 plasmid pND103       |
| 641210308 | Haemophilus paragallinarum HP250 plasmid p250               | 640048561 | Streptococcus thermophilus ST371 plasmid pER371       |
| 645047341 | Haemophilus parasuis HN7061 plasmid pHN61                   | 640048558 | Streptococcus thermophilus plasmid pER13              |
| 641210310 | Haemophilus parasuis HS1543 plasmid pHS-Tet                 | 642914217 | Streptococcus thermophilus plasmid pSMQ-316           |
| 641210309 | Haemophilus parasuis plasmid pHS-Rec                        | 641210459 | Streptococcus thermophilus plasmid pSMQ308            |
| 641210311 | Hafnia alvei MISC230 plasmid pAlVA                          | 641210460 | Streptomyces albulus IFO 14147 plasmid pNO33          |
| 641210312 | Hafnia alvei MISC261 plasmid pAlvB                          | 640048565 | Streptomyces clavuligerus NRRL 3585 plasmid pSCL      |
| 640048345 | Haloarchaeal coccus LOC-1 plasmid pHGN1                     | 640048566 | Streptomyces coelicolor plasmid 2 SCP2*               |
| 641210313 | Haloarcula sp. AS7094 plasmid pSCM201                       | 642481270 | Streptomyces cyaneus plasmid pSA1.1                   |
| 640048346 | Halobacterium salinarum SB3 plasmid pHSB                    | 642481271 | Streptomyces flavovirens plasmid pSN22                |
| 642481230 | Halobacterium salinarum plasmid pHH205                      | 641210461 | Streptomyces ghanaensis DSM2932 plasmid pSG5          |
| 642481231 | Halobacterium salinarum plasmid pPHIHL                      | 641210462 | Streptomyces laurentii ATCC 31255 plasmid pSLS        |
| 640048467 | Haloferax volcanii DS2 plasmid pHV2                         | 642481272 | Streptomyces lavendulae plasmid pSLG33                |
| 640048347 | Halorubrum saccharovororum plasmid pZMX101                  | 640048567 | Streptomyces lividans 1326 plasmid SLP2               |
| 646556917 | Haloterrigena thermotolerans H13 plasmid pSN                | 640048468 | Streptomyces lividans plasmid pIJ101                  |
| 640048348 | Helicobacter pylori 489 plasmid pHP489                      | 640048568 | Streptomyces natalensis plasmid pSNA1                 |
| 642914153 | Helicobacter pylori 69 plasmid pHP69                        | 640048569 | Streptomyces phaeochromogenes NRRL-B3559 plasmid pJV1 |
| 646556918 | Helicobacter pylori AL226 plasmid pAL226                    | 640048570 | Streptomyces rochei 7434AN4 plasmid pSLA2-L           |
| 642914154 | Helicobacter pylori CCUG 17874; NCTC 11638 plasmid pHP666   | 642914218 | Streptomyces sp. 44030 plasmid pRL1                   |
| 640048349 | Helicobacter pylori HPM180 plasmid pHPM180                  | 641210463 | Streptomyces sp. 44414 plasmid pRL2                   |
| 640048350 | Helicobacter pylori HPM186 plasmid pHPM186                  | 640048571 | Streptomyces sp. EN27 plasmid pEN2701                 |
| 640048351 | Helicobacter pylori HPM8 plasmid pHPM8                      | 641210464 | Streptomyces sp. F11 plasmid pFP11                    |
| 640048352 | Helicobacter pylori OU145B plasmid pHPO100                  | 641210465 | Streptomyces sp. FQ1 plasmid pFP1                     |
| 640048354 | Helicobacter pylori P29 plasmid pHel5                       | 642914219 | Streptomyces sp. FR1 plasmid pFRL1                    |

## Supplementary information

|           |                                                         |           |                                                                         |
|-----------|---------------------------------------------------------|-----------|-------------------------------------------------------------------------|
| 640048353 | <i>Helicobacter pylori</i> P8 plasmid pHel4             | 642481273 | <i>Streptomyces</i> sp. HK1 plasmid pSHK1                               |
| 641210314 | <i>Helicobacter pylori</i> plasmid pAL202               | 646556937 | <i>Streptomyces</i> sp. W9 plasmid pCQ3                                 |
| 641210315 | <i>Helicobacter pylori</i> plasmid pHP51                | 646556938 | <i>Streptomyces</i> sp. Y27 plasmid pWTY27                              |
| 640048344 | <i>Histophilus somni</i> 57/98 plasmid p57/98           | 646556939 | <i>Streptomyces</i> sp. ZL12 plasmid pZL12                              |
| 640048355 | <i>Histophilus somni</i> 9L plasmid p9L                 | 646556940 | <i>Streptomyces</i> sp. x3 plasmid pTSC2                                |
| 641210316 | IncP-1 plasmid pKJK5                                    | 641210466 | <i>Streptomyces venezuelae</i> ETH14630 plasmid pSVH1                   |
| 641210317 | IncP-1beta multiresistance plasmid pB8                  | 640048572 | <i>Streptomyces violaceoruber</i> SANK95570 plasmid pSV2                |
| 648934916 | <i>Klebsiella oxytoca</i> KOX105 KOX105 plasmid pKOX105 | 640048573 | <i>Sulfolobus islandicus</i> HEN7H2 plasmid pHEN7                       |
| 645047346 | <i>Klebsiella pneumoniae</i> 0773 plasmid pCTXM360      | 640048574 | <i>Sulfolobus islandicus</i> P1 plasmid pING1                           |
| 645047347 | <i>Klebsiella pneumoniae</i> 0773 plasmid pKpn114       | 640048575 | <i>Sulfolobus islandicus</i> REN1H1 plasmid pRN1                        |
| 645047348 | <i>Klebsiella pneumoniae</i> 12 plasmid 12              | 640048576 | <i>Sulfolobus islandicus</i> REN1H1 plasmid pRN2                        |
| 645047349 | <i>Klebsiella pneumoniae</i> 15 plasmid 15S             | 641507387 | <i>Sulfolobus islandicus</i> Rey 15/4 plasmid pSSVx                     |
| 640048361 | <i>Klebsiella pneumoniae</i> 2kl plasmid pKPN2          | 641210467 | <i>Sulfolobus islandicus</i> plasmid pARN3                              |
| 645047350 | <i>Klebsiella pneumoniae</i> 9 plasmid 9                | 641210468 | <i>Sulfolobus islandicus</i> plasmid pARN4                              |
| 650625515 | <i>Klebsiella pneumoniae</i> 997 plasmid pc15-k         | 641210469 | <i>Sulfolobus islandicus</i> plasmid pHEV14                             |
| 640048359 | <i>Klebsiella pneumoniae</i> BM4493 plasmid pP843       | 641210470 | <i>Sulfolobus islandicus</i> plasmid pKEF9                              |
| 648934917 | <i>Klebsiella pneumoniae</i> C132-98 plasmid unnamed    | 642914220 | <i>Sulfolobus islandicus</i> plasmid pSOG1                              |
| 641210318 | <i>Klebsiella pneumoniae</i> CG43 plasmid pLVPK         | 642914221 | <i>Sulfolobus islandicus</i> plasmid pSOG2                              |
| 642914155 | <i>Klebsiella pneumoniae</i> FC1 plasmid pMET-1         | 642481274 | <i>Sulfolobus islandicus</i> plasmid pXZ1                               |
| 640048360 | <i>Klebsiella pneumoniae</i> JHCK1 plasmid pJHCMW1      | 641210471 | <i>Sulfolobus neozealandicus</i> plasmid pORA1                          |
| 648018805 | <i>Klebsiella pneumoniae</i> KF3 plasmid pKF3-140       | 641210472 | <i>Sulfolobus solfataricus</i> IT3 plasmid pIT3                         |
| 646556919 | <i>Klebsiella pneumoniae</i> KF3 plasmid pKF3-70        | 641210473 | <i>Sulfolobus</i> sp. NOB8H2 plasmid pNOB8                              |
| 648018806 | <i>Klebsiella pneumoniae</i> KF3 plasmid pKF3-94        | 641210474 | <i>Sulfolobus tengchongensis</i> plasmid pTC                            |
| 648934918 | <i>Klebsiella pneumoniae</i> KP048 plasmid pKP048       | 643660942 | <i>Synechococcus elongatus</i> PCC 7942 PCC 7942 plasmid pANL           |
| 643660924 | <i>Klebsiella pneumoniae</i> KP96 plasmid pKP96         | 640048578 | <i>Synechococcus elongatus</i> PCC 7942 plasmid pUH24                   |
| 648018807 | <i>Klebsiella pneumoniae</i> Kpn557 plasmid pKpQIL      | 642481275 | <i>Synechococcus</i> sp. plasmid pMA4                                   |
| 642914156 | <i>Klebsiella pneumoniae</i> NK245 plasmid pK245        | 640048580 | <i>Synechocystis</i> sp. PCC 6803 plasmid pCB2.4                        |
| 642914157 | <i>Klebsiella pneumoniae</i> NK29 plasmid pK29          | 642914222 | <i>Tetragenococcus halophilus</i> H plasmid pHDC                        |
| 648934919 | <i>Klebsiella pneumoniae</i> NL194 plasmid pNL194       | 642914223 | <i>Tetragenococcus halophilus</i> PB18 plasmid pSKPB18                  |
| 642481232 | <i>Klebsiella pneumoniae</i> NTUH-K2044 plasmid pK2044  | 640048581 | <i>Thermoanaerobacterium thermosaccharolyticum</i> DSM 571 plasmid pNB2 |
| 645047342 | <i>Klebsiella pneumoniae</i> plasmid p169               | 641210475 | <i>Thermococcus nautilus</i> 30-1 plasmid pTN1                          |
| 645047343 | <i>Klebsiella pneumoniae</i> plasmid p9701              | 648018824 | <i>Thermococcus nautilus</i> 30/1 plasmid pTN2                          |
| 642481233 | <i>Klebsiella pneumoniae</i> plasmid pH205              | 648018825 | <i>Thermococcus</i> sp. 26/2 26/2 plasmid pT26-2                        |
| 645047344 | <i>Klebsiella pneumoniae</i> plasmid pIGMS31            | 645047386 | <i>Thermococcus</i> sp. AMT11 plasmid pAMT11                            |
| 645047345 | <i>Klebsiella pneumoniae</i> plasmid pIGRK              | 641210476 | <i>Thermoplasma acidophilum</i> H0-122 plasmid pTA1                     |
| 640048362 | <i>Klebsiella pneumoniae</i> plasmid pKleB-k17/80       | 641210477 | <i>Thermotoga petrophila</i> RKU1 plasmid pRKU1                         |
| 640048363 | <i>Klebsiella</i> sp. KCL-2 plasmid pMGD2               | 642914224 | <i>Thermus</i> sp. 4C plasmid pL4C                                      |

## Supplementary information

|           |                                                                              |           |                                                               |
|-----------|------------------------------------------------------------------------------|-----------|---------------------------------------------------------------|
| 648934920 | <i>Lactobacillus acidipiscis</i> ACA-DC 1533 plasmid pLAC1                   | 642914225 | <i>Thermus</i> sp. 4C plasmid pS4C                            |
| 640048364 | <i>Lactobacillus acidophilus</i> TK8912 plasmid pLA103                       | 643660943 | <i>Thermus thermophilus</i> HB8 plasmid pTT8                  |
| 640048365 | <i>Lactobacillus acidophilus</i> TK8912 plasmid pLA106                       | 642481276 | <i>Thermus thermophilus</i> plasmid pTF62                     |
| 645047351 | <i>Lactobacillus brevis</i> 925A plasmid pLB925A01                           | 650625531 | <i>Thiomonas</i> sp. 3As 3As plasmid pTHI                     |
| 645047352 | <i>Lactobacillus brevis</i> 925A plasmid pLB925A02                           | 642914226 | Tomato big bud phytoplasma plasmid pTBBperi                   |
| 645047353 | <i>Lactobacillus brevis</i> 925A plasmid pLB925A03                           | 640048582 | <i>Treponema denticola</i> U9b plasmid pTS1                   |
| 645047354 | <i>Lactobacillus brevis</i> 925A plasmid pLB925A04                           | 640048583 | Uncultured bacterium plasmid pB10                             |
| 641210320 | <i>Lactobacillus brevis</i> ABBC45 plasmid pRH45II                           | 640048584 | Uncultured bacterium plasmid pB4                              |
| 650625516 | <i>Lactobacillus brevis</i> D11 plasmid pSD11                                | 641210479 | Uncultured bacterium plasmid pRSB101                          |
| 640048366 | <i>Lactobacillus casei</i> CRL705 plasmid pRC18                              | 641210480 | Uncultured bacterium plasmid pTB11                            |
| 642481234 | <i>Lactobacillus casei</i> plasmid pSMA23                                    | 641210481 | Uncultured bacterium plasmid pTP6                             |
| 641210321 | <i>Lactobacillus casei</i> plasmid pYIT356                                   | 641210482 | Uncultured bacterium plasmid pTRACA10                         |
| 643660925 | <i>Lactobacillus casei</i> str. Zhang Zhang plasmid plca36                   | 641210483 | Uncultured bacterium plasmid pTRACA17                         |
| 640048367 | <i>Lactobacillus delbrueckii</i> WS58 plasmid pWS58                          | 640048585 | Uncultured eubacterium pIE1115 plasmid pIE1115                |
| 642914158 | <i>Lactobacillus delbrueckii bulgaricus</i> B36 plasmid pDOJ1                | 640048586 | Uncultured eubacterium plasmid pIE1130                        |
| 640048368 | <i>Lactobacillus delbrueckii bulgaricus</i> plasmid pLBB1                    | 645047387 | <i>Vibrio alginolyticus</i> E259 plasmid pVAE259              |
| 640048369 | <i>Lactobacillus delbrueckii lactis</i> JCL414 plasmid pJBL2                 | 642914227 | <i>Vibrio cholerae</i> G1.1 plasmid pVCG1.1                   |
| 640048371 | <i>Lactobacillus delbrueckii lactis</i> NCC88 plasmid pN42                   | 642914228 | <i>Vibrio cholerae</i> G1.1 plasmid pVCG1.2                   |
| 643660926 | <i>Lactobacillus farciminis</i> KCTC3681 plasmid pLF24                       | 642914229 | <i>Vibrio cholerae</i> G4.1 plasmid pVCG4.1                   |
| 640048372 | <i>Lactobacillus fermentum</i> KC5b plasmid pKC5b                            | 640048587 | <i>Vibrio cholerae</i> O395P plasmid pTLC                     |
| 640048373 | <i>Lactobacillus fermentum</i> ROT1 plasmid pLME300                          | 641210484 | <i>Vibrio cholerae</i> SIO plasmid pSIO1                      |
| 643660927 | <i>Lactobacillus gasseri</i> LA39 plasmid pLgLA39                            | 643660944 | <i>Vibrio fischeri</i> ES213 plasmid pES213                   |
| 640048374 | <i>Lactobacillus helveticus</i> ATCC15009 plasmid pLH1                       | 643660945 | <i>Vibrio fluvialis</i> BD146 plasmid pBD146                  |
| 650625517 | <i>Lactobacillus helveticus</i> R0052 R0052 plasmid pIR52-1                  | 642914230 | <i>Vibrio nigrispulchritudo</i> SFn1 plasmid pSFn1            |
| 640048375 | <i>Lactobacillus helveticus</i> jugurti SBT2161 plasmid pLJ1                 | 645047388 | <i>Vibrio parahaemolyticus</i> A5-5 plasmid pZY5              |
| 645047355 | <i>Lactobacillus johnsonii</i> F19785 plasmid p9785S                         | 640048588 | <i>Vibrio parahaemolyticus</i> KXV237 plasmid pO3K6           |
| 642914159 | <i>Lactobacillus paracasei</i> MA3 plasmid pMA3                              | 642481277 | <i>Vibrio parahaemolyticus</i> plasmid pSA19                  |
| 645047356 | <i>Lactobacillus paracasei paracasei</i> BGSJ2-8 plasmid pSJ2-8              | 642914231 | <i>Vibrio shilonii</i> AK1 plasmid pAK1                       |
| 646556920 | <i>Lactobacillus paracasei</i> subsp. <i>paracasei</i> NFBC338 plasmid pCD01 | 641507390 | <i>Vibrio</i> sp. 09022 plasmid p09022A                       |
| 646556921 | <i>Lactobacillus paracasei</i> subsp. <i>paracasei</i> NFBC338 plasmid pCD02 | 641507391 | <i>Vibrio</i> sp. 0908 plasmid p0908                          |
| 645047357 | <i>Lactobacillus pentosus</i> F121-1 plasmid p1-4                            | 641507392 | <i>Vibrio</i> sp. 23023 plasmid p23023                        |
| 640048379 | <i>Lactobacillus plantarum</i> 5057 plasmid pMD5057                          | 642481278 | <i>Vibrio</i> sp. 41 plasmid pPS41                            |
| 641210324 | <i>Lactobacillus plantarum</i> BIFI-38 plasmid pPB1                          | 641210487 | <i>Vibrio</i> sp. TC68 plasmid pTC68                          |
| 643660928 | <i>Lactobacillus plantarum</i> CICC 6002 plasmid pLP2111                     | 642914232 | <i>Vibrio tapetis</i> CECT4600; CIP104856; B1090 plasmid pVT1 |
| 645047359 | <i>Lactobacillus plantarum</i> KLDS 1.0801                                   | 641210489 | <i>Vibrio vulnificus</i> CECT4602 plasmid pC4602-1            |

Supplementary information

|           |                                                |           |                                                         |
|-----------|------------------------------------------------|-----------|---------------------------------------------------------|
|           | plasmid pLD1                                   |           |                                                         |
| 642914160 | Lactobacillus plantarum L137 plasmid pLTK13    | 641210490 | Vibrio vulnificus CECT4602 plasmid pC4602-2             |
| 640048378 | Lactobacillus plantarum L137 plasmid pLTK2     | 641210488 | Vibrio vulnificus CECT4999=R99 plasmid                  |
| 642914161 | Lactobacillus plantarum LR1 plasmid pLR1       | 645047389 | Vibrio vulnificus MP-4 plasmid pMP1                     |
| 641210323 | Lactobacillus plantarum M4 plasmid pM4         | 641507393 | Weissella cibaria plasmid pKLCA                         |
| 641210322 | Lactobacillus plantarum NC7 plasmid p256       | 641210491 | Weissella cibaria plasmid pKLCB                         |
| 650625518 | Lactobacillus plantarum PC518 plasmid pLPI8    | 642914233 | Weissella cibaria plasmid pKW2130                       |
| 646556922 | Lactobacillus plantarum S1 plasmid pLP2140     | 642914234 | Xanthomonas axonopodis pv. glycines 8ra plasmid pXAG81  |
| 648018808 | Lactobacillus plantarum TXW plasmid pTXW       | 642914235 | Xanthomonas axonopodis pv. glycines 8ra plasmid pXAG82  |
| 648934921 | Lactobacillus plantarum XY3 plasmid pXY3       | 642914236 | Xanthomonas axonopodis pv. glycines AG1 plasmid pAG1    |
| 641507370 | Lactobacillus plantarum plasmid pA1            | 640048589 | Xanthomonas campestris pv. vesicatoria plasmid pXV64    |
| 640048462 | Lactobacillus plantarum plasmid pC30il         | 641210492 | Xanthomonas citri plasmid pXcB                          |
| 645047358 | Lactobacillus plantarum plasmid pLFE1          | 640048590 | Xylella fastidiosa ATTC 35868 plasmid pXF868            |
| 640048376 | Lactobacillus plantarum plasmid pLP2000        | 648934930 | Xylella fastidiosa Riv11 plasmid pXF-RIV11              |
| 640048377 | Lactobacillus plantarum plasmid pLP9000        | 648934931 | Xylella fastidiosa Riv16 plasmid pXF-RIV16              |
| 640048380 | Lactobacillus reuteri 100-23 plasmid pGT232    | 648934932 | Xylella fastidiosa Riv19 plasmid pXF-RIV19              |
| 640048382 | Lactobacillus reuteri AE78 plasmid pAE78       | 648934933 | Xylella fastidiosa Riv25 plasmid pXF-RIV25              |
| 640048381 | Lactobacillus reuteri AE78 plasmid pTE44       | 645047390 | Yersinia enterocolitica 07-04449 plasmid pYe4449-1      |
| 650625519 | Lactobacillus reuteri K50 plasmid pK50-2       | 645047391 | Yersinia enterocolitica 07-04449 plasmid pYe4449-2      |
| 642914162 | Lactobacillus reuteri L09 plasmid pLR091       | 640048591 | Yersinia enterocolitica 127/90 plasmid pYVa127/90       |
| 642481235 | Lactobacillus reuteri plasmid pLR581           | 641210493 | Yersinia enterocolitica 29807 plasmid p29807            |
| 642481236 | Lactobacillus reuteri plasmid pLR585           | 643660946 | Yersinia enterocolitica 8081 plasmid pYVe8081           |
| 643660929 | Lactobacillus sakei BM5 plasmid pYC2           | 640048592 | Yersinia enterocolitica W22703 plasmid pYVe227          |
| 640048383 | Lactobacillus sakei RV332 plasmid pRV500       | 642481279 | Yersinia enterocolitica plasmid pYE854                  |
| 642914163 | Lactobacillus sakei YSI8 plasmid pYSI8         | 641210494 | Yersinia pestis CA88-4125 plasmid pCD1                  |
| 642481237 | Lactobacillus sakei plasmid pLS55              | 641210495 | Yersinia pestis CA88-4125 plasmid pMT1                  |
| 640048459 | Lactobacillus sp. PC121B plasmid p121BS        | 640048598 | Yersinia pestis CH971662 plasmid pYC                    |
| 642914164 | Lactococcus garvieae plasmid pKL0018           | 641210496 | Yersinia pestis bv Orientalis IP275 plasmid pIP1202     |
| 640048387 | Lactococcus lactis CRL1127 plasmid pCRL1127    | 641210497 | Yersinia pestis plasmid pG8786                          |
| 640048391 | Lactococcus lactis DCH-4 plasmid pSRQ700       | 643660947 | Yersinia pseudotuberculosis IP32637 plasmid pGDT4       |
| 640048384 | Lactococcus lactis DPC220 plasmid pAH33        | 641210498 | Yersinia ruckeri YR71 plasmid pYR1                      |
| 640048390 | Lactococcus lactis DPC3147 plasmid pMRC01      | 641210500 | Zymomonas mobilis ATCC 10988 plasmid pZMO2              |
| 640048389 | Lactococcus lactis IL964 plasmid pIL105        | 640048602 | Zymomonas mobilis ATCC10988 plasmid pZMO1               |
| 643660930 | Lactococcus lactis KLDS4.0319-3 plasmid pKL001 | 640048601 | Zymomonas mobilis ZM4 plasmid 1                         |
| 640048386 | Lactococcus lactis ML8 plasmid pCL2.1          | 645047392 | Zymomonas mobilis mobilis ATCC 10988 plasmid pZMO1      |
| 641210325 | Lactococcus lactis NCDO 1867 plasmid pGdh442   | 642914237 | Zymomonas mobilis mobilis CP4 plasmid pCP4.2            |
|           |                                                | 648934934 | Zymomonas mobilis subsp. mobilis ZM4 ZM4 plasmid pZM401 |
|           |                                                | 648934935 | Zymomonas mobilis subsp. mobilis ZM4 ZM4 plasmid pZM402 |

Supplementary information

|           |                                                             |
|-----------|-------------------------------------------------------------|
| 648934936 | Zymomonas mobilis subsp. mobilis ZM4 ZM4 plasmid pZZM403    |
| 648934937 | Zymomonas mobilis subsp. mobilis ZM4 ZM4 plasmid pZZM404    |
| 648934938 | Zymomonas mobilis subsp. mobilis ZM4 ZM4 plasmid pZZM405    |
| 641507400 | Zymomonas mobilis unknown plasmid                           |
| 642914107 | alpha proteobacterium endosymbiont of Amoeba plasmid pAP3.9 |
| 645047393 | endophytic bacterium LOB-07 plasmid pLK39                   |
| 646556941 | uncultured bacterium plasmid pTRACA18                       |
| 646556942 | uncultured bacterium plasmid pTRACA20                       |
| 646556943 | uncultured bacterium plasmid pTRACA22                       |
| 646556944 | uncultured bacterium plasmid pTRACA30                       |

**Supplementary Table 5**

**Phylogenetic classification of the functionally predictable protein coding genes in the non-redundant 5x covered Morges MIRA-CONTIGS data subset in comparison to the proportion of cells in Morges activated sludge hybridising to a fluorescently labeled rRNA-directed taxonomic probe**

| <b>Taxons</b>                       | <b>Nr. of BLASTP hits</b> | <b>Proportion of hits (%)</b> | <b>Proportion of cells by FISH (%)</b> |
|-------------------------------------|---------------------------|-------------------------------|----------------------------------------|
| <i>Betaproteobacteria</i>           | 565                       | 32                            | 34.0                                   |
| <i>Gammaproteobacteria</i>          | 265                       | 15                            | 3.0                                    |
| <i>Alphaproteobacteria</i>          | 88                        | 5                             | 36.0                                   |
| unclassified <i>Proteobacteria</i>  | 393                       | 22                            | NA                                     |
| Delta/Epsilon subdivisions          | 37                        | 2                             | 4.0                                    |
| <i>Actinobacteria</i>               | 45                        | 2.5                           | 12.0                                   |
| <i>Bacteroidetes/Chlorobi</i> group | 35                        | 2.0                           | 7.0                                    |
| <i>Cyanobacteria</i>                | 9                         | 0.5                           | NA                                     |
| <i>Firmicutes</i>                   | 14                        | 1.8                           | <1                                     |
| Other bacteria                      | 239                       | 14                            | 4                                      |
| <b>Total</b>                        | <b>1739</b>               | <b>100</b>                    | <b>100</b>                             |

Protein coding genes were predicted in the MIRA-CONTIGS data subset by using Metagen within CAMERA. The ‘All prokaryotic proteins’ database was queried by using BLASTP (e-value cutoff = 0.01). The output was analyzed within MEGAN with a BLAST score value cutoff set to 35 and the minimal number of hits per taxon limit set to 1. Hits were only scored within the top 10% of the maximum score value.

**Supplementary Table 6. Assembled replicons from the Morges 2007 MIRA data set.**

| Contig Name    | Length, bp   | Fold Coverage | GenBank     | Remark |
|----------------|--------------|---------------|-------------|--------|
| M02_c2         | 4722         | 49            | JX194161.1  |        |
| M02_c3         | 7462         | 40            |             |        |
| M02_c5         | 14573        | 48            | JX194159.1  |        |
| M02_c6         | 36689        | 51            | JX194160.1  |        |
| M02_c7         | 2314         | 50            | JX202560.1  |        |
| M02_c11        | 1633         | 55            | JX202561.1  |        |
| M02_c15        | 12062        | 39            |             |        |
| M02_c18        | 38015        | 50            | awaiting nr |        |
| M02_c22        | 26126        | 30            |             |        |
| M02_c24        | 7427         | 24            |             |        |
| M02_c37        | 4361         | 31            |             |        |
| M02_c41        | 3086         | 36            |             |        |
| M02_c42        | 2196         | 23            |             |        |
| M02_c47        | 2310         | 37            |             |        |
| M02_c50        | 13142        | 20            |             |        |
| M02_c54        | 2502         | 72            | JX202562.1  |        |
| M02_c60        | 2517         | 32            |             |        |
| M02_c69        | 3636         | 20            |             |        |
| M02_c81        | 22374        | 18            |             |        |
| M02_c85        | 9199         | 23            |             |        |
| M02_c90        | 1934         | 60            | JX202563.1  |        |
| M02_c104       | 1682         | 25            |             |        |
| M02_c128       | 1816         | 86            |             |        |
| M02_c139       | 1773         | 14            |             |        |
| M02_c169       | 2412         | 12            |             |        |
| M02_c189       | 2124         | 100           |             |        |
| M02_c191       | 10012        | 13            |             |        |
| M02_c192       | 12183        | 10            |             |        |
| M02_c222       | 1821         | 64            |             |        |
| M02_c243       | 2844         | 8             |             |        |
| M02_c1053      | 11295        | 9             |             |        |
| M02_c11577     | 17822        | 57            | awaiting nr |        |
| M02_c11584     | 12681        | 36            | awaiting nr |        |
| M02_c11700     | 48785        | 10            | awaiting nr | phage  |
| M02_c11704     | 22414        | 14            |             | phage  |
| M02_c11712     | 12313        | 8             |             | phage  |
| M02_c11728     | 9745         | 10            |             |        |
| M02_c11732     | 11718        | 19            |             |        |
| M02_c11740     | 4170         | 21            | JX202564.1  |        |
| M02_c11742     | 21309        | 11            |             |        |
| Contig11697    | 59231        | 43            | awaiting nr |        |
| <i>Min</i>     | <i>1633</i>  | <i>8</i>      |             |        |
| <i>Max</i>     | <i>59231</i> | <i>100</i>    |             |        |
| <i>Average</i> | <i>11864</i> | <i>34</i>     |             |        |
| <i>Median</i>  | <i>7462</i>  | <i>30</i>     |             |        |

**Supplementary Table S7****Abundance and number of hits in the sublevel 2 'Resistance to antibiotics and toxic compounds' in the Morges 2007 plasmid metagenome**

| <b>level 3</b>                                                  | <b>function</b>                                                                  | <b>abundance</b> | <b>avg eValue</b> | <b>avg % ident</b> | <b>avg align len</b> | <b># hits</b> |
|-----------------------------------------------------------------|----------------------------------------------------------------------------------|------------------|-------------------|--------------------|----------------------|---------------|
| <b>Multidrug Resistance Efflux Pumps</b>                        | Acriflavin resistance protein                                                    | 12               | -23.54            | 62.51              | 89.31                | 12            |
| <b>Bile hydrolysis</b>                                          | Alpha-ketoglutarate-dependent taurine dioxygenase (EC 1.14.11.17)                | 5                | -11               | 60.15              | 54                   | 3             |
| <b>Arsenic resistance</b>                                       | Arsenate reductase (EC 1.20.4.1)                                                 | 4                | -25.2             | 71.84              | 72.4                 | 4             |
| <b>Arsenic resistance</b>                                       | Arsenic resistance protein ArsH                                                  | 1                | -65               | 83.69              | 141                  | 1             |
| <b>Arsenic resistance</b>                                       | Arsenical pump-driving ATPase (EC 3.6.3.16)                                      | 1                | -17               | 64.52              | 62                   | 1             |
| <b>Arsenic resistance</b>                                       | Arsenical-resistance protein ACR3                                                | 1                | -23               | 77.14              | 70                   | 1             |
| <b>Beta-lactamase</b>                                           | Beta-lactamase                                                                   | 133              | -31               | 61.29              | 103.11               | 34            |
| <b>Beta-lactamase</b>                                           | Beta-lactamase (EC 3.5.2.6)                                                      | 112              | -31.98            | 60.99              | 106.2                | 21            |
| <b>BlaR1 Family Regulatory Sensor-transducer Disambiguation</b> | Beta-lactamase (EC 3.5.2.6)                                                      | 112              | -31.98            | 60.99              | 106.2                | 21            |
| <b>Beta-lactamase</b>                                           | Beta-lactamase class C and other penicillin binding proteins                     | 14               | -27.91            | 62.02              | 95.36                | 8             |
| <b>Beta-lactamase</b>                                           | Beta-lactamase class D                                                           | 5                | -24               | 60.54              | 83.33                | 2             |
| <b>Cobalt-zinc-cadmium resistance</b>                           | Cation efflux system protein CusA                                                | 563              | -64.65            | 76.34              | 157.35               | 81            |
| <b>Cobalt-zinc-cadmium resistance</b>                           | Cd(II)/Pb(II)-responsive transcriptional regulator                               | 86               | -21               | 64.18              | 76.23                | 9             |
| <b>Resistance to chromium compounds</b>                         | Chromate resistance protein ChrB                                                 | 4                | -25.25            | 66.19              | 90.5                 | 4             |
| <b>Resistance to chromium compounds</b>                         | Chromate transport protein ChrA                                                  | 8                | -54               | 80.78              | 124.73               | 6             |
| <b>Cobalt-zinc-cadmium resistance</b>                           | Cobalt-zinc-cadmium resistance protein                                           | 616              | -59.01            | 75.82              | 145.64               | 97            |
| <b>Cobalt-zinc-cadmium resistance</b>                           | Cobalt-zinc-cadmium resistance protein CzcA                                      | 563              | -64.65            | 76.34              | 157.35               | 81            |
| <b>Cobalt-zinc-cadmium resistance</b>                           | Cobalt-zinc-cadmium resistance protein CzcD                                      | 10               | -31.7             | 68.76              | 93.8                 | 10            |
| <b>Cobalt-zinc-cadmium resistance</b>                           | Cobalt/zinc/cadmium efflux RND transporter, membrane fusion protein, CzcB family | 134              | -49.59            | 70.59              | 137.28               | 16            |
| <b>Copper homeostasis</b>                                       | CopG protein                                                                     | 6                | -23.33            | 63.53              | 79.67                | 3             |
| <b>Copper</b>                                                   | Copper chaperone                                                                 | 4                | -18.67            | 73.18              | 63                   | 2             |



|                                                                 |                                                                 |     |        |       |        |    |
|-----------------------------------------------------------------|-----------------------------------------------------------------|-----|--------|-------|--------|----|
| <b>homeostasis</b>                                              |                                                                 |     |        |       |        |    |
| <b>Copper homeostasis:</b>                                      | Copper homeostasis protein CutE                                 | 2   | -13    | 61.58 | 61     | 2  |
| <b>copper tolerance</b>                                         |                                                                 |     |        |       |        |    |
| <b>Cobalt-zinc-cadmium resistance</b>                           | Copper sensory histidine kinase CusS                            | 74  | -39.25 | 67.2  | 123    | 4  |
| <b>Copper homeostasis</b>                                       | Copper sensory histidine kinase CusS                            | 74  | -39.25 | 67.2  | 123    | 4  |
| <b>Copper homeostasis</b>                                       | Copper tolerance protein                                        | 4   | -50.25 | 71.02 | 143.5  | 4  |
| <b>Cobalt-zinc-cadmium resistance</b>                           | Copper-sensing two-component system response regulator CusR     | 58  | -48.25 | 75.96 | 125.38 | 3  |
| <b>Copper homeostasis</b>                                       | Copper-sensing two-component system response regulator CusR     | 58  | -48.25 | 75.96 | 125.38 | 3  |
| <b>BlaR1 Family Regulatory Sensor-transducer Disambiguation</b> | Copper-translocating P-type ATPase (EC 3.6.3.4)                 | 596 | -59.4  | 77.4  | 146.85 | 57 |
| <b>Copper homeostasis</b>                                       | Copper-translocating P-type ATPase (EC 3.6.3.4)                 | 596 | -59.4  | 77.4  | 146.85 | 57 |
| <b>Copper homeostasis</b>                                       | Cytochrome c heme lyase subunit CcmF                            | 1   | -6     | 63.64 | 33     | 1  |
| <b>Copper homeostasis</b>                                       | Cytochrome c heme lyase subunit CcmH                            | 2   | -10.5  | 61.28 | 57     | 2  |
| <b>Resistance to fluoroquinolones</b>                           | DNA gyrase subunit B (EC 5.99.1.3)                              | 3   | -81.33 | 77.14 | 186.67 | 3  |
| <b>Cobalt-zinc-cadmium resistance</b>                           | DNA-binding heavy metal response regulator                      | 62  | -31    | 72.69 | 90     | 12 |
| <b>Cobalt-zinc-cadmium resistance</b>                           | Heavy metal RND efflux outer membrane protein, CzcC family      | 151 | -28.35 | 68.18 | 91.63  | 22 |
| <b>Cobalt-zinc-cadmium resistance</b>                           | Heavy metal sensor histidine kinase                             | 35  | -26.71 | 66.14 | 95.24  | 5  |
| <b>Multidrug Resistance Efflux Pumps</b>                        | Macrolide export ATP-binding/permease protein MacB (EC 3.6.3.-) | 6   | -28.83 | 71.92 | 88.17  | 6  |
| <b>Multidrug Resistance Efflux Pumps</b>                        | Macrolide-specific efflux protein MacA                          | 1   | -63.5  | 64.39 | 199    | 1  |
| <b>Copper homeostasis:</b>                                      | Magnesium and cobalt efflux protein CorC                        | 1   | -17    | 72.58 | 62     | 1  |
| <b>copper tolerance</b>                                         |                                                                 |     |        |       |        |    |
| <b>Multidrug Resistance Efflux Pumps</b>                        | Membrane fusion protein of RND family multidrug efflux pump     | 1   | -6     | 64.29 | 42     | 1  |
| <b>Mercuric reductase</b>                                       | Mercuric ion reductase (EC 1.16.1.1)                            | 136 | -91.12 | 88.82 | 191.34 | 13 |
| <b>Mercury resistance operon</b>                                | Mercuric ion reductase (EC 1.16.1.1)                            | 136 | -91.12 | 88.82 | 191.34 | 13 |
| <b>Mercury resistance operon</b>                                | Mercuric resistance operon coregulator                          | 44  | -48.11 | 89.79 | 109.22 | 4  |
| <b>Mercury resistance operon</b>                                | Mercuric resistance operon regulatory protein                   | 146 | -26.76 | 81.2  | 74.24  | 14 |
| <b>Mercury resistance</b>                                       | Mercuric transport protein, MerC                                | 102 | -45.12 | 87.13 | 98.81  | 5  |

|                                                                      |                                                                    |     |        |       |        |    |
|----------------------------------------------------------------------|--------------------------------------------------------------------|-----|--------|-------|--------|----|
| <b>operon</b>                                                        |                                                                    |     |        |       |        |    |
| <b>Mercury resistance operon</b>                                     | Mercuric transport protein, MerE                                   | 1   | -29    | 82.19 | 73     | 1  |
| <b>Mercury resistance operon</b>                                     | Mercuric transport protein, MerT                                   | 139 | -25.54 | 85.7  | 63.82  | 14 |
| <b>Copper homeostasis</b>                                            | Multicopper oxidase                                                | 13  | -55.17 | 72.87 | 130.08 | 10 |
| <b>Multidrug Resistance Efflux Pumps</b>                             | Multidrug efflux RND transporter MexD                              | 1   | -40    | 55.63 | 151    | 1  |
| <b>MexE-MexF-OprN Multidrug Efflux System</b>                        | Multidrug efflux transporter MexF                                  | 2   | -67.5  | 62.85 | 198    | 2  |
| <b>Copper homeostasis</b>                                            | Multidrug resistance transporter, Bcr/CflA family                  | 1   | -37    | 58.82 | 136    | 1  |
| <b>Copper homeostasis: copper tolerance</b>                          | Periplasmic divalent cation tolerance protein cutA                 | 2   | -9     | 51.79 | 56     | 1  |
| <b>Mercury resistance operon</b>                                     | Periplasmic mercury(+2) binding protein                            | 65  | -20.19 | 80.36 | 60.25  | 12 |
| <b>Mercuric reductase</b>                                            | PF00070 family, FAD-dependent NAD(P)-disulphide oxidoreductase     | 3   | -16    | 64.95 | 67.33  | 3  |
| <b>Cobalt-zinc-cadmium resistance</b>                                | Probable Co/Zn/Cd efflux system membrane fusion protein            | 8   | -41    | 74.57 | 101    | 8  |
| <b>The mdtABCD multidrug resistance cluster</b>                      | Probable RND efflux membrane fusion protein                        | 14  | -64.31 | 78.82 | 152.81 | 10 |
| <b>Zinc resistance</b>                                               | Response regulator of zinc sigma-54-dependent two-component system | 3   | -43.67 | 61.76 | 142.67 | 3  |
| <b>Multidrug Resistance Efflux Pumps</b>                             | RND efflux system, outer membrane lipoprotein CmeC                 | 4   | -17    | 62.86 | 73.25  | 4  |
| <b>Multidrug efflux pump in Campylobacter jejuni (CmeABC operon)</b> | RND efflux system, outer membrane lipoprotein CmeC                 | 4   | -17    | 62.86 | 73.25  | 4  |
| <b>Erythromycin resistance</b>                                       | rRNA adenine N-6-methyltransferase (EC 2.1.1.48)                   | 1   | -106   | 97.92 | 192    | 1  |
| <b>The mdtABCD multidrug resistance cluster</b>                      | Sensory histidine kinase BaeS                                      | 1   | -8     | 55.36 | 56     | 1  |
| <b>Aminoglycoside adenylyltransferases</b>                           | Spectinomycin 9-O-adenylyltransferase                              | 54  | -69.4  | 93.49 | 138.73 | 5  |
| <b>Aminoglycoside adenylyltransferases</b>                           | Streptomycin 3'-O-adenylyltransferase (EC 2.7.7.47)                | 54  | -69.4  | 93.49 | 138.73 | 5  |
| <b>Resistance to chromium compounds</b>                              | Superoxide dismutase ChrC                                          | 5   | -9     | 70.07 | 41     | 1  |
| <b>Resistance to chromium compounds</b>                              | Superoxide dismutase SodM-like protein ChrF                        | 3   | -16.2  | 72.37 | 52.8   | 3  |
| <b>Resistance to</b>                                                 | Topoisomerase IV subunit A (EC                                     | 1   | -52    | 67.65 | 136    | 1  |

|                                                |                                                                                                    |    |        |       |       |    |
|------------------------------------------------|----------------------------------------------------------------------------------------------------|----|--------|-------|-------|----|
| <b>fluoroquinolones</b>                        | 5.99.1.-)                                                                                          |    |        |       |       |    |
| <b>Resistance to fluoroquinolones</b>          | Topoisomerase IV subunit B (EC 5.99.1.-)                                                           | 2  | -20    | 72.33 | 68    | 2  |
| <b>Multidrug Resistance Efflux Pumps</b>       | Transcription regulator of multidrug efflux pump operon, TetR (AcrR) family                        | 1  | -10    | 67.35 | 49    | 1  |
| <b>Cobalt-zinc-cadmium resistance</b>          | Transcriptional regulator, MerR family                                                             | 63 | -22.12 | 68.9  | 76.46 | 16 |
| <b>Multidrug Resistance Efflux Pumps</b>       | Type I secretion outer membrane protein, TolC precursor                                            | 2  | -9     | 60.77 | 52.5  | 2  |
| <b>Methicillin resistance in Staphylococci</b> | UDP-N-acetylmuramoylalanyl-D-glutamate--2,6-diaminopimelate ligase (EC 6.3.2.13)                   | 1  | -19    | 79.66 | 59    | 1  |
| <b>Methicillin resistance in Staphylococci</b> | UDP-N-acetylmuramoylalanyl-D-glutamyl-2,6-diaminopimelate--D-alanyl-D-alanine ligase (EC 6.3.2.10) | 1  | -8     | 60    | 45    | 1  |
| <b>Methicillin resistance in Staphylococci</b> | Undecaprenyl-phosphate N-acetylglucosaminyl 1-phosphate transferase (EC 2.7.8.-)                   | 5  | -11.4  | 67.26 | 48.6  | 5  |
| <b>Resistance to Vancomycin</b>                | Vancomycin B-type resistance protein VanW                                                          | 1  | -9     | 60.87 | 46    | 1  |

Seed subsystems categorization level 1: Virulence, Disease and Defense, plus level 2: Resistance to antibiotics and toxic compounds. Metagenome entry: 4464065.3

**Supplementary Table S8:**  
**Abundances and number of hits to functions within the SEED subcategory**  
**'Resistance to antibiotics and toxic compounds'. Dataset Morges 2009.**

| function                                                                         | abundance | avg eValue | avg % ident | avg align len | # hits |
|----------------------------------------------------------------------------------|-----------|------------|-------------|---------------|--------|
| Cystine ABC transporter, permease protein                                        | 2         | -8.5       | 61.87       | 49            | 2      |
| D-cysteine desulfhydrase (EC 4.4.1.15)                                           | 1         | -6         | 62.5        | 40            | 1      |
| Spectinomycin 9-O-adenylyltransferase                                            | 78        | -42.44     | 92.16       | 92.66         | 9      |
| Streptomycin 3'-O-adenylyltransferase (EC 2.7.7.47)                              | 78        | -42.44     | 92.16       | 92.66         | 9      |
| Arsenate reductase (EC 1.20.4.1)                                                 | 2         | -23        | 96.83       | 55            | 2      |
| Arsenical pump-driving ATPase (EC 3.6.3.16)                                      | 4         | -21        | 75.03       | 65.25         | 4      |
| Arsenical resistance operon repressor                                            | 1         | -13        | 70.59       | 51            | 1      |
| Arsenical-resistance protein ACR3                                                | 2         | -22.5      | 76.64       | 66.5          | 2      |
| Beta-lactamase                                                                   | 157       | -19.99     | 65.83       | 71.96         | 47     |
| Beta-lactamase (EC 3.5.2.6)                                                      | 148       | -20.94     | 65.49       | 74.79         | 35     |
| Beta-lactamase AmpS                                                              | 1         | -14        | 70.37       | 54            | 1      |
| Beta-lactamase class A                                                           | 1         | -4         | 66.67       | 30            | 1      |
| Beta-lactamase class C and other penicillin binding proteins                     | 1         | -27        | 71.25       | 80            | 1      |
| Beta-lactamase class D                                                           | 2         | -8.5       | 64.48       | 46.5          | 2      |
| Metal-dependent hydrolases of the beta-lactamase superfamily I                   | 1         | -46        | 69.49       | 118           | 1      |
| Metal-dependent hydrolases of the beta-lactamase superfamily II                  | 1         | -46        | 69.49       | 118           | 1      |
| Metal-dependent hydrolases of the beta-lactamase superfamily III                 | 1         | -46        | 69.49       | 118           | 1      |
| Negative regulator of beta-lactamase expression                                  | 1         | -11        | 56.14       | 57            | 1      |
| Alpha-ketoglutarate-dependent taurine dioxygenase (EC 1.14.11.17)                | 1         | -22        | 52.87       | 87            | 1      |
| Choloylglycine hydrolase (EC 3.5.1.24)                                           | 1         | -6         | 67.65       | 34            | 1      |
| Beta-lactamase (EC 3.5.2.6)                                                      | 148       | -20.94     | 65.49       | 74.79         | 35     |
| Beta-lactamase class A                                                           | 1         | -4         | 66.67       | 30            | 1      |
| Copper-translocating P-type ATPase (EC 3.6.3.4)                                  | 408       | -32.26     | 80.9        | 86.32         | 74     |
| Peptidase M48, Ste24p precursor                                                  | 1         | -19        | 80          | 60            | 1      |
| Transcriptional regulator, Mecl family                                           | 1         | -23        | 80.6        | 67            | 1      |
| Cation efflux system protein CusA                                                | 352       | -28.96     | 76.3        | 82.17         | 121    |
| Cd(II)/Pb(II)-responsive transcriptional regulator                               | 48        | -17.8      | 65.86       | 68.2          | 12     |
| Cobalt-zinc-cadmium resistance protein                                           | 376       | -28        | 75.78       | 80.84         | 141    |
| Cobalt-zinc-cadmium resistance protein CzcA                                      | 352       | -28.96     | 76.3        | 82.17         | 121    |
| Cobalt-zinc-cadmium resistance protein CzcD                                      | 14        | -22.65     | 72.48       | 74.75         | 14     |
| Cobalt/zinc/cadmium efflux RND transporter, membrane fusion protein, CzcB family | 83        | -27.42     | 78.95       | 79.31         | 16     |
| Copper sensory histidine kinase CusS                                             | 37        | -19.05     | 70.13       | 70.16         | 6      |
| Copper-sensing two-component system response regulator CusR                      | 24        | -28.33     | 78.94       | 79.42         | 3      |
| DNA-binding heavy metal response regulator                                       | 37        | -17.94     | 73.72       | 59.87         | 11     |

## Supplementary information

|                                                                                                    |     |        |       |       |    |
|----------------------------------------------------------------------------------------------------|-----|--------|-------|-------|----|
| Heavy metal RND efflux outer membrane protein, CzcC family                                         | 87  | -13.47 | 71.05 | 56.09 | 25 |
| Heavy metal sensor histidine kinase                                                                | 29  | -20.55 | 70.06 | 73.79 | 8  |
| Probable Co/Zn/Cd efflux system membrane fusion protein                                            | 11  | -21.77 | 68.09 | 75.08 | 9  |
| Putative silver efflux pump                                                                        | 1   | -15    | 67.24 | 58    | 1  |
| Transcriptional regulator, MerR family                                                             | 61  | -18.71 | 76.07 | 61.29 | 20 |
| Zinc transporter ZitB                                                                              | 1   | -16    | 73.68 | 57    | 1  |
| CopG protein                                                                                       | 3   | -20    | 64.41 | 70.67 | 3  |
| Copper chaperone                                                                                   | 3   | -10.25 | 77.25 | 45    | 2  |
| Copper resistance protein B                                                                        | 8   | -18.12 | 68.02 | 63    | 8  |
| Copper resistance protein D                                                                        | 5   | -14.4  | 69.09 | 57    | 4  |
| Copper sensory histidine kinase CusS                                                               | 37  | -19.05 | 70.13 | 70.16 | 6  |
| Copper tolerance protein                                                                           | 7   | -15.14 | 64.64 | 60.57 | 7  |
| Copper-sensing two-component system response regulator CusR                                        | 24  | -28.33 | 78.94 | 79.42 | 3  |
| Copper-translocating P-type ATPase (EC 3.6.3.4)                                                    | 408 | -32.26 | 80.9  | 86.32 | 74 |
| Cytochrome c heme lyase subunit CcmF                                                               | 1   | -25    | 78.57 | 70    | 1  |
| Multicopper oxidase                                                                                | 33  | -30.87 | 76.18 | 80.22 | 17 |
| Sensor protein copS (EC 2.7.3.-)                                                                   | 3   | -5.5   | 57.64 | 42    | 1  |
| Cytoplasmic copper homeostasis protein cutC                                                        | 1   | -6     | 75.76 | 33    | 1  |
| Magnesium and cobalt efflux protein CorC                                                           | 2   | -12.5  | 64.75 | 60.5  | 2  |
| Periplasmic divalent cation tolerance protein cutA                                                 | 2   | -10.5  | 58.91 | 54.5  | 2  |
| Dimethyladenosine transferase (EC 2.1.1.-)                                                         | 1   | -29    | 79.27 | 82    | 1  |
| Mercuric ion reductase (EC 1.16.1.1)                                                               | 84  | -41.28 | 90.21 | 95    | 11 |
| PF00070 family, FAD-dependent NAD(P)-disulphide oxidoreductase                                     | 1   | -11    | 70.21 | 47    | 1  |
| Mercuric ion reductase (EC 1.16.1.1)                                                               | 84  | -41.28 | 90.21 | 95    | 11 |
| Mercuric resistance operon coregulator                                                             | 13  | -31.25 | 88.36 | 78.12 | 5  |
| Mercuric resistance operon regulatory protein                                                      | 32  | -24.06 | 86.24 | 64.31 | 9  |
| Mercuric transport protein, MerC                                                                   | 15  | -36.57 | 84.87 | 84.71 | 4  |
| Mercuric transport protein, MerE                                                                   | 5   | -16.75 | 87.26 | 49.75 | 3  |
| Mercuric transport protein, MerT                                                                   | 39  | -17.27 | 83.88 | 51.8  | 11 |
| Periplasmic mercury(+2) binding protein                                                            | 27  | -21.5  | 84.39 | 61.6  | 8  |
| RNA polymerase sigma factor SigB                                                                   | 2   | -13    | 90.43 | 40.5  | 2  |
| UDP-N-acetylmuramoylalanyl-D-glutamate--2,6-diaminopimelate ligase (EC 6.3.2.13)                   | 6   | -11.67 | 64.8  | 53.17 | 6  |
| UDP-N-acetylmuramoylalanyl-D-glutamyl-2,6-diaminopimelate--D-alanyl-D-alanine ligase (EC 6.3.2.10) | 5   | -9     | 82.3  | 39.5  | 4  |
| Undecaprenyl-phosphate N-acetylglucosaminyl 1-phosphate transferase (EC 2.7.8.-)                   | 1   | -3     | 74.07 | 27    | 1  |
| Acriflavin resistance protein                                                                      | 36  | -13.5  | 70.58 | 53.13 | 27 |
| Macrolide export ATP-binding/permease protein MacB (EC 3.6.3.-)                                    | 1   | -9     | 57.69 | 52    | 1  |
| Macrolide-specific efflux protein MacA                                                             | 1   | -6     | 81.82 | 33    | 1  |
| Multi antimicrobial extrusion protein (Na(+)/drug antiporter), MATE family of MDR efflux pumps     | 1   | -3     | 74.19 | 31    | 1  |

Supplementary information

|                                                                                   |    |        |       |       |    |
|-----------------------------------------------------------------------------------|----|--------|-------|-------|----|
| Multidrug efflux RND transporter MexD                                             | 1  | -37    | 81.82 | 99    | 1  |
| RND efflux system, inner membrane transporter CmeB                                | 7  | -26    | 72.6  | 81.56 | 7  |
| RND efflux system, outer membrane lipoprotein CmeC                                | 4  | -15    | 62.58 | 67.75 | 4  |
| RND efflux system, outer membrane lipoprotein, NodT family                        | 1  | -3     | 71.43 | 28    | 1  |
| Transcription repressor of multidrug efflux pump acrAB operon, TetR (AcrR) family | 1  | -4     | 55.1  | 49    | 1  |
| Type I secretion outer membrane protein, TolC precursor                           | 3  | -14.67 | 70.51 | 62.33 | 3  |
| RND efflux system, inner membrane transporter CmeB                                | 7  | -26    | 72.6  | 81.56 | 7  |
| RND efflux system, outer membrane lipoprotein CmeC                                | 4  | -15    | 62.58 | 67.75 | 4  |
| Sensor histidine kinase VanS (EC 2.7.3.-)                                         | 1  | -4     | 100   | 21    | 1  |
| Chromate resistance protein ChrB                                                  | 17 | -15.62 | 71.98 | 58.38 | 9  |
| Chromate transport protein ChrA                                                   | 10 | -27.87 | 75.37 | 80.67 | 8  |
| Superoxide dismutase ChrC                                                         | 5  | -6.33  | 69.4  | 35.67 | 2  |
| Superoxide dismutase SodM-like protein ChrF                                       | 13 | -9.22  | 82.69 | 33.67 | 6  |
| DNA gyrase subunit A (EC 5.99.1.3)                                                | 21 | -25.83 | 73.93 | 75.28 | 18 |
| DNA gyrase subunit B (EC 5.99.1.3)                                                | 11 | -35.5  | 79.79 | 90.9  | 9  |
| Topoisomerase IV subunit A (EC 5.99.1.-)                                          | 4  | -37    | 74.14 | 98    | 4  |
| Topoisomerase IV subunit B (EC 5.99.1.-)                                          | 6  | -20.83 | 83.16 | 59.83 | 5  |
| Multidrug transporter MdtC                                                        | 1  | -32    | 67    | 100   | 1  |
| Probable RND efflux membrane fusion protein                                       | 18 | -13.64 | 66.59 | 58.07 | 10 |
| Sensory histidine kinase BaeS                                                     | 1  | -5     | 68.97 | 29    | 1  |
| Response regulator of zinc sigma-54-dependent two-component system                | 3  | -15.67 | 62.94 | 68.33 | 3  |

Seed subsystems categorization level 1: Virulence, Disease and Defense, plus level 2: Resistance to antibiotics and toxic compounds. Metagenome entry: 4464073.3

**Supplementary Table S9. Abundance and number of hits in the sublevel 2 'Resistance to antibiotics and toxic compounds' in the Visp 2009 plasmid metagenome.**

| Level 3                                    | function                                                          | abundance | avg eValue | avg % ident | avg align len | # hits |
|--------------------------------------------|-------------------------------------------------------------------|-----------|------------|-------------|---------------|--------|
| <b>Adaptation to d-cysteine</b>            | Cystine ABC transporter, permease protein                         | 1         | -17        | 54.88       | 82            | 1      |
| <b>Aminoglycoside adenylyltransferases</b> | Spectinomycin 9-O-adenylyltransferase                             | 44        | -12.52     | 95.43       | 37.29         | 4      |
| <b>Aminoglycoside adenylyltransferases</b> | Spectinomycin 9-O-adenylyltransferase                             | 1         | -11        | 94.29       | 35            | 1      |
| <b>Aminoglycoside adenylyltransferases</b> | Streptomycin 3'-O-adenylyltransferase (EC 2.7.7.47)               | 44        | -12.52     | 95.43       | 37.29         | 4      |
| <b>Aminoglycoside adenylyltransferases</b> | Streptomycin 3'-O-adenylyltransferase (EC 2.7.7.47)               | 1         | -11        | 94.29       | 35            | 1      |
| <b>Arsenic resistance</b>                  | Arsenate reductase (EC 1.20.4.1)                                  | 1369      | -19.94     | 78.28       | 61.26         | 36     |
| <b>Arsenic resistance</b>                  | Arsenate reductase (EC 1.20.4.1)                                  | 19        | -37.5      | 73.68       | 102           | 8      |
| <b>Arsenic resistance</b>                  | Arsenic resistance protein ArsH                                   | 1030      | -32.97     | 85.56       | 80.41         | 27     |
| <b>Arsenic resistance</b>                  | Arsenic resistance protein ArsH                                   | 5         | -74.17     | 89.86       | 150           | 4      |
| <b>Arsenic resistance</b>                  | Arsenical pump-driving ATPase (EC 3.6.3.16)                       | 44        | -18.38     | 70.75       | 65.54         | 17     |
| <b>Arsenic resistance</b>                  | Arsenical pump-driving ATPase (EC 3.6.3.16)                       | 4         | -21        | 73.06       | 67.75         | 3      |
| <b>Arsenic resistance</b>                  | Arsenical resistance operon repressor                             | 3         | -6         | 66.5        | 35.33         | 3      |
| <b>Arsenic resistance</b>                  | Arsenical resistance operon repressor                             | 1         | -8         | 55.56       | 45            | 1      |
| <b>Arsenic resistance</b>                  | Arsenical-resistance protein ACR3                                 | 3249      | -29.88     | 81.63       | 79.9          | 35     |
| <b>Arsenic resistance</b>                  | Arsenical-resistance protein ACR3                                 | 29        | -64.3      | 74.23       | 157.35        | 15     |
| <b>Beta-lactamase</b>                      | Beta-lactamase                                                    | 116       | -20.57     | 63.9        | 74.62         | 26     |
| <b>Beta-lactamase</b>                      | Beta-lactamase                                                    | 8         | -26.67     | 60.89       | 99.17         | 6      |
| <b>Beta-lactamase</b>                      | Beta-lactamase (EC 3.5.2.6)                                       | 108       | -20.13     | 61.23       | 77.56         | 17     |
| <b>Beta-lactamase</b>                      | Beta-lactamase (EC 3.5.2.6)                                       | 8         | -26.67     | 60.89       | 99.17         | 6      |
| <b>Beta-lactamase</b>                      | Beta-lactamase class C and other penicillin binding proteins      | 7         | -23.4      | 71.15       | 71.4          | 7      |
| <b>Beta-lactamase</b>                      | Metal-dependent hydrolases of the beta-lactamase superfamily I    | 27        | -16.8      | 65.55       | 61.93         | 13     |
| <b>Beta-lactamase</b>                      | Metal-dependent hydrolases of the beta-lactamase superfamily I    | 1         | -13        | 70.21       | 47            | 1      |
| <b>Beta-lactamase</b>                      | Metal-dependent hydrolases of the beta-lactamase superfamily II   | 1         | -23        | 65.28       | 72            | 1      |
| <b>Beta-lactamase</b>                      | Metal-dependent hydrolases of the beta-lactamase superfamily III  | 1         | -23        | 65.28       | 72            | 1      |
| <b>Bile hydrolysis</b>                     | Alpha-ketoglutarate-dependent taurine dioxygenase (EC 1.14.11.17) | 19        | -22.83     | 70.63       | 72.33         | 5      |

|                                                                             |                                                                   |     |        |       |        |     |
|-----------------------------------------------------------------------------|-------------------------------------------------------------------|-----|--------|-------|--------|-----|
| <b>Bile hydrolysis</b>                                                      | Alpha-ketoglutarate-dependent taurine dioxygenase (EC 1.14.11.17) | 1   | -22    | 75.36 | 69     | 1   |
| <b>Bile hydrolysis</b>                                                      | Choloylglycine hydrolase (EC 3.5.1.24)                            | 2   | -27.5  | 68.53 | 84.5   | 2   |
| <b>BlaR1 Family<br/>Regulatory<br/>Sensor-transducer<br/>Disambiguation</b> | Beta-lactamase (EC 3.5.2.6)                                       | 108 | -20.13 | 61.23 | 77.56  | 17  |
| <b>BlaR1 Family<br/>Regulatory<br/>Sensor-transducer<br/>Disambiguation</b> | Beta-lactamase (EC 3.5.2.6)                                       | 8   | -26.67 | 60.89 | 99.17  | 6   |
| <b>BlaR1 Family<br/>Regulatory<br/>Sensor-transducer<br/>Disambiguation</b> | Copper-translocating P-type ATPase (EC 3.6.3.4)                   | 491 | -30.54 | 74.97 | 89.21  | 131 |
| <b>BlaR1 Family<br/>Regulatory<br/>Sensor-transducer<br/>Disambiguation</b> | Copper-translocating P-type ATPase (EC 3.6.3.4)                   | 32  | -50.64 | 74.99 | 131.21 | 25  |
| <b>BlaR1 Family<br/>Regulatory<br/>Sensor-transducer<br/>Disambiguation</b> | Peptidase M48, Ste24p precursor                                   | 2   | -43.5  | 85.33 | 102.5  | 2   |
| <b>BlaR1 Family<br/>Regulatory<br/>Sensor-transducer<br/>Disambiguation</b> | Regulatory sensor-transducer, BlaR1/MecR1 family                  | 1   | -7     | 64.1  | 39     | 1   |
| <b>BlaR1 Family<br/>Regulatory<br/>Sensor-transducer<br/>Disambiguation</b> | Transcriptional repressor, BlaI/MecI family                       | 1   | -50    | 86.44 | 118    | 1   |
| <b>Cadmium<br/>resistance</b>                                               | Cadmium efflux system accessory protein                           | 1   | -30    | 61.17 | 103    | 1   |
| <b>Cadmium<br/>resistance</b>                                               | Cadmium resistance protein                                        | 2   | -14.5  | 89.17 | 44.5   | 1   |
| <b>Cadmium<br/>resistance</b>                                               | Cadmium-transporting ATPase (EC 3.6.3.3)                          | 8   | -20.43 | 71.16 | 71.43  | 3   |
| <b>Cadmium<br/>resistance</b>                                               | Cadmium-transporting ATPase (EC 3.6.3.3)                          | 1   | -18    | 69.12 | 68     | 1   |
| <b>Cobalt-zinc-<br/>cadmium<br/>resistance</b>                              | Cadmium-transporting ATPase (EC 3.6.3.3)                          | 8   | -20.43 | 71.16 | 71.43  | 3   |
| <b>Cobalt-zinc-<br/>cadmium<br/>resistance</b>                              | Cadmium-transporting ATPase (EC 3.6.3.3)                          | 1   | -18    | 69.12 | 68     | 1   |
| <b>Cobalt-zinc-<br/>cadmium<br/>resistance</b>                              | Cation efflux system protein CusA                                 | 59  | -28.92 | 74.56 | 85.55  | 41  |
| <b>Cobalt-zinc-<br/>cadmium<br/>resistance</b>                              | Cd(II)/Pb(II)-responsive transcriptional regulator                | 1   | -14    | 68.63 | 51     | 1   |
| <b>Cobalt-zinc-<br/>cadmium<br/>resistance</b>                              | Cd(II)/Pb(II)-responsive transcriptional regulator                | 1   | -46    | 66.67 | 126    | 1   |
| <b>Cobalt-zinc-<br/>cadmium<br/>resistance</b>                              | Cobalt-zinc-cadmium resistance protein                            | 293 | -28.88 | 75.32 | 82.77  | 67  |



|                                       |                                                                                  |     |        |       |        |    |
|---------------------------------------|----------------------------------------------------------------------------------|-----|--------|-------|--------|----|
| <b>Cobalt-zinc-cadmium resistance</b> | Cobalt-zinc-cadmium resistance protein                                           | 34  | -45.91 | 72.51 | 121.09 | 16 |
| <b>Cobalt-zinc-cadmium resistance</b> | Cobalt-zinc-cadmium resistance protein CzcA                                      | 61  | -28.72 | 74.64 | 85.06  | 43 |
| <b>Cobalt-zinc-cadmium resistance</b> | Cobalt-zinc-cadmium resistance protein CzcD                                      | 196 | -26.84 | 74.53 | 77.37  | 17 |
| <b>Cobalt-zinc-cadmium resistance</b> | Cobalt-zinc-cadmium resistance protein CzcD                                      | 28  | -46.11 | 71.19 | 124    | 13 |
| <b>Cobalt-zinc-cadmium resistance</b> | Cobalt/zinc/cadmium efflux RND transporter, membrane fusion protein, CzcB family | 17  | -18.62 | 71.27 | 65.25  | 12 |
| <b>Cobalt-zinc-cadmium resistance</b> | Copper sensory histidine kinase CusS                                             | 1   | -37    | 61.72 | 128    | 1  |
| <b>Cobalt-zinc-cadmium resistance</b> | Copper-sensing two-component system response regulator CusR                      | 3   | -24.5  | 81.86 | 71.5   | 2  |
| <b>Cobalt-zinc-cadmium resistance</b> | DNA-binding heavy metal response regulator                                       | 5   | -28.4  | 73.39 | 83.2   | 5  |
| <b>Cobalt-zinc-cadmium resistance</b> | Heavy metal RND efflux outer membrane protein, CzcC family                       | 7   | -14.86 | 70.02 | 60.57  | 7  |
| <b>Cobalt-zinc-cadmium resistance</b> | Heavy metal resistance transcriptional regulator HmrR                            | 28  | -17.67 | 65.59 | 67.67  | 9  |
| <b>Cobalt-zinc-cadmium resistance</b> | Heavy metal resistance transcriptional regulator HmrR                            | 5   | -24    | 68.29 | 79     | 3  |
| <b>Cobalt-zinc-cadmium resistance</b> | Heavy metal sensor histidine kinase                                              | 3   | -21    | 60.72 | 88     | 2  |
| <b>Cobalt-zinc-cadmium resistance</b> | Heavy metal sensor histidine kinase                                              | 1   | -49    | 71.74 | 138    | 1  |
| <b>Cobalt-zinc-cadmium resistance</b> | Hypothetical protein involved in heavy metal export                              | 3   | -24.17 | 71.27 | 80.83  | 3  |
| <b>Cobalt-zinc-cadmium resistance</b> | Probable Co/Zn/Cd efflux system membrane fusion protein                          | 2   | -14.5  | 72.36 | 53.5   | 2  |
| <b>Cobalt-zinc-cadmium resistance</b> | Probable cadmium-transporting ATPase (EC 3.6.3.3)                                | 2   | -18    | 63.24 | 68     | 1  |
| <b>Cobalt-zinc-cadmium resistance</b> | Putative silver efflux pump                                                      | 2   | -33    | 78.96 | 102    | 2  |
| <b>Cobalt-zinc-cadmium resistance</b> | Transcriptional regulator, MerR family                                           | 35  | -13.27 | 69.25 | 53.5   | 15 |
| <b>Cobalt-zinc-cadmium resistance</b> | Transcriptional regulator, MerR family                                           | 5   | -38    | 73.96 | 109.5  | 2  |
| <b>Copper</b>                         | Blue copper oxidase CueO                                                         | 2   | -13.33 | 63.88 | 55.67  | 2  |

|                                             |                                                                |     |        |       |        |     |
|---------------------------------------------|----------------------------------------------------------------|-----|--------|-------|--------|-----|
| <b>homeostasis</b>                          | precursor                                                      |     |        |       |        |     |
| <b>Copper homeostasis</b>                   | Blue copper oxidase CueO precursor                             | 1   | -14.33 | 66.26 | 57.33  | 1   |
| <b>Copper homeostasis</b>                   | CopG protein                                                   | 36  | -25.7  | 75.43 | 72.3   | 6   |
| <b>Copper homeostasis</b>                   | CopG protein                                                   | 6   | -43.75 | 76.45 | 105.25 | 4   |
| <b>Copper homeostasis</b>                   | Copper chaperone                                               | 7   | -6.17  | 69.66 | 36.17  | 4   |
| <b>Copper homeostasis</b>                   | Copper resistance protein B                                    | 3   | -20.5  | 71.57 | 77.5   | 3   |
| <b>Copper homeostasis</b>                   | Copper sensory histidine kinase CusS                           | 1   | -37    | 61.72 | 128    | 1   |
| <b>Copper homeostasis</b>                   | Copper tolerance protein                                       | 3   | -20.33 | 79.54 | 61.33  | 3   |
| <b>Copper homeostasis</b>                   | Copper-sensing two-component system response regulator CusR    | 3   | -24.5  | 81.86 | 71.5   | 2   |
| <b>Copper homeostasis</b>                   | Copper-translocating P-type ATPase (EC 3.6.3.4)                | 491 | -30.54 | 74.97 | 89.21  | 131 |
| <b>Copper homeostasis</b>                   | Copper-translocating P-type ATPase (EC 3.6.3.4)                | 32  | -50.64 | 74.99 | 131.21 | 25  |
| <b>Copper homeostasis</b>                   | Cu(I)-responsive transcriptional regulator                     | 23  | -17.5  | 63.89 | 67.75  | 12  |
| <b>Copper homeostasis</b>                   | Cu(I)-responsive transcriptional regulator                     | 3   | -28    | 64.5  | 89.67  | 3   |
| <b>Copper homeostasis</b>                   | Cytochrome c heme lyase subunit CcmF                           | 4   | -18.5  | 72.96 | 61.75  | 3   |
| <b>Copper homeostasis</b>                   | Multicopper oxidase                                            | 49  | -18.64 | 66.94 | 67.08  | 19  |
| <b>Copper homeostasis</b>                   | Multicopper oxidase                                            | 6   | -16.71 | 62.92 | 65.29  | 4   |
| <b>Copper homeostasis</b>                   | Multidrug resistance transporter, Bcr/CflA family              | 1   | -10    | 75    | 40     | 1   |
| <b>Copper homeostasis: copper tolerance</b> | Copper homeostasis protein CutE                                | 5   | -11    | 60.66 | 51.5   | 4   |
| <b>Copper homeostasis: copper tolerance</b> | Magnesium and cobalt efflux protein CorC                       | 2   | -7     | 74.26 | 40     | 2   |
| <b>Erythromycin resistance</b>              | Dimethyladenosine transferase (EC 2.1.1.-)                     | 1   | -22    | 58.62 | 87     | 1   |
| <b>Fosfomycin resistance</b>                | Fosfomycin resistance protein FosX                             | 1   | -32    | 80.72 | 83     | 1   |
| <b>Mercuric reductase</b>                   | Mercuric ion reductase (EC 1.16.1.1)                           | 187 | -33.43 | 78.03 | 90.66  | 27  |
| <b>Mercuric reductase</b>                   | Mercuric ion reductase (EC 1.16.1.1)                           | 2   | -22.5  | 75.47 | 76.5   | 2   |
| <b>Mercuric reductase</b>                   | PF00070 family, FAD-dependent NAD(P)-disulphide oxidoreductase | 1   | -22    | 62.5  | 80     | 1   |
| <b>Mercury resistance operon</b>            | Mercuric ion reductase (EC 1.16.1.1)                           | 187 | -33.43 | 78.03 | 90.66  | 27  |
| <b>Mercury resistance operon</b>            | Mercuric ion reductase (EC 1.16.1.1)                           | 2   | -22.5  | 75.47 | 76.5   | 2   |
| <b>Mercury resistance operon</b>            | Mercuric resistance operon coregulator                         | 1   | -12    | 92.31 | 39     | 1   |
| <b>Mercury resistance</b>                   | Mercuric resistance operon                                     | 59  | -27.12 | 86.11 | 69.06  | 12  |

|                                                |                                                                                                            |    |        |       |       |    |
|------------------------------------------------|------------------------------------------------------------------------------------------------------------|----|--------|-------|-------|----|
| <b>operon</b>                                  | regulatory protein                                                                                         |    |        |       |       |    |
| <b>Mercury resistance operon</b>               | Mercuric resistance operon regulatory protein                                                              | 17 | -42    | 93.98 | 92.12 | 6  |
| <b>Mercury resistance operon</b>               | Mercuric transport protein, MerE                                                                           | 1  | -7     | 93.1  | 29    | 1  |
| <b>Mercury resistance operon</b>               | Mercuric transport protein, MerT                                                                           | 70 | -21.82 | 82.01 | 59.43 | 15 |
| <b>Mercury resistance operon</b>               | Mercuric transport protein, MerT                                                                           | 16 | -27    | 81.1  | 70.88 | 6  |
| <b>Mercury resistance operon</b>               | Periplasmic mercury(+2) binding protein                                                                    | 11 | -16.67 | 72.99 | 59.22 | 6  |
| <b>Methicillin resistance in Staphylococci</b> | UDP-N-acetylmuramoylalanyl-D-glutamyl-2,6-diaminopimelate--D-alanyl-D-alanine ligase (EC 6.3.2.10)         | 3  | -5     | 65.81 | 37.67 | 3  |
| <b>Methicillin resistance in Staphylococci</b> | Undecaprenyl-phosphate N-acetylglucosaminyl 1-phosphate transferase (EC 2.7.8.-)                           | 13 | -12.8  | 66.53 | 52.9  | 9  |
| <b>Methicillin resistance in Staphylococci</b> | Undecaprenyl-phosphate N-acetylglucosaminyl 1-phosphate transferase (EC 2.7.8.-)                           | 5  | -7.8   | 65.31 | 43.8  | 3  |
| <b>MexE-MexF-OprN Multidrug Efflux System</b>  | Multidrug efflux transporter MexF                                                                          | 2  | -23.67 | 57.5  | 91.67 | 2  |
| <b>Multidrug Resistance Efflux Pumps</b>       | Acriflavin resistance protein                                                                              | 81 | -17.33 | 64.49 | 69.1  | 28 |
| <b>Multidrug Resistance Efflux Pumps</b>       | Acriflavin resistance protein                                                                              | 6  | -17.33 | 61.67 | 72.83 | 5  |
| <b>Multidrug Resistance Efflux Pumps</b>       | Macrolide export ATP-binding/permease protein MacB (EC 3.6.3.-)                                            | 8  | -27.62 | 80.58 | 76.88 | 6  |
| <b>Multidrug Resistance Efflux Pumps</b>       | Macrolide-specific efflux protein MacA                                                                     | 4  | -16    | 63.45 | 68.5  | 4  |
| <b>Multidrug Resistance Efflux Pumps</b>       | Multi antimicrobial extrusion protein (Na <sup>+</sup> )/drug antiporter), MATE family of MDR efflux pumps | 4  | -5.67  | 64.43 | 37.33 | 1  |
| <b>Multidrug Resistance Efflux Pumps</b>       | Multidrug-efflux transporter, major facilitator superfamily (MFS) (TC 2.A.1)                               | 2  | -22    | 58.94 | 87.33 | 2  |
| <b>Multidrug Resistance Efflux Pumps</b>       | Probable transcription regulator protein of MDR efflux pump cluster                                        | 1  | -23    | 69.74 | 76    | 1  |
| <b>Multidrug Resistance Efflux Pumps</b>       | RND efflux system, inner membrane transporter CmeB                                                         | 20 | -22.2  | 69.23 | 75.1  | 9  |
| <b>Multidrug Resistance Efflux Pumps</b>       | RND efflux system, inner membrane transporter CmeB                                                         | 3  | -43    | 73.96 | 121   | 3  |
| <b>Multidrug Resistance Efflux Pumps</b>       | RND efflux system, outer membrane lipoprotein CmeC                                                         | 9  | -21    | 68.74 | 70.71 | 7  |
| <b>Multidrug Resistance Efflux Pumps</b>       | RND efflux system, outer membrane lipoprotein, NodT family                                                 | 3  | -15    | 65.43 | 62    | 2  |

|                                                                             |                                                                                                   |    |        |       |        |   |
|-----------------------------------------------------------------------------|---------------------------------------------------------------------------------------------------|----|--------|-------|--------|---|
| <b>Multidrug Resistance Efflux Pumps</b>                                    | Transcription repressor of multidrug efflux pump <i>acrAB</i> operon, TetR ( <i>AcrR</i> ) family | 3  | -6.33  | 62.37 | 42.67  | 3 |
| <b>Multidrug Resistance Efflux Pumps</b>                                    | Type I secretion outer membrane protein, TolC precursor                                           | 3  | -19.67 | 63.45 | 82.33  | 3 |
| <b>Multidrug efflux pump in <i>Campylobacter jejuni</i> (CmeABC operon)</b> | RND efflux system, inner membrane transporter CmeB                                                | 20 | -22.2  | 69.23 | 75.1   | 9 |
| <b>Multidrug efflux pump in <i>Campylobacter jejuni</i> (CmeABC operon)</b> | RND efflux system, inner membrane transporter CmeB                                                | 3  | -43    | 73.96 | 121    | 3 |
| <b>Multidrug efflux pump in <i>Campylobacter jejuni</i> (CmeABC operon)</b> | RND efflux system, outer membrane lipoprotein CmeC                                                | 9  | -21    | 68.74 | 70.71  | 7 |
| <b>Multiple Antibiotic Resistance MAR locus</b>                             | Multiple antibiotic resistance protein MarC                                                       | 6  | -13.25 | 72.07 | 52.75  | 4 |
| <b>Multiple Antibiotic Resistance MAR locus</b>                             | Multiple antibiotic resistance protein MarC                                                       | 1  | -30    | 67.68 | 99     | 1 |
| <b>Polymyxin Synthetase Gene Cluster in <i>Bacillus</i></b>                 | Polymyxin synthetase PmxA                                                                         | 1  | -9     | 62.75 | 51     | 1 |
| <b>Resistance to chromium compounds</b>                                     | Chromate resistance protein ChrB                                                                  | 1  | -16    | 93.48 | 46     | 1 |
| <b>Resistance to chromium compounds</b>                                     | Chromate transport protein ChrA                                                                   | 8  | -21.62 | 71.33 | 71.12  | 8 |
| <b>Resistance to chromium compounds</b>                                     | Chromate transport protein ChrA                                                                   | 1  | -30    | 71.28 | 94     | 1 |
| <b>Resistance to chromium compounds</b>                                     | Superoxide dismutase ChrC                                                                         | 1  | -69    | 96.9  | 129    | 1 |
| <b>Resistance to chromium compounds</b>                                     | Superoxide dismutase SodM-like protein ChrF                                                       | 2  | -29.5  | 74.27 | 84     | 2 |
| <b>Resistance to fluoroquinolones</b>                                       | DNA gyrase subunit A (EC 5.99.1.3)                                                                | 4  | -42.75 | 76.91 | 113.75 | 4 |
| <b>Resistance to fluoroquinolones</b>                                       | DNA gyrase subunit B (EC 5.99.1.3)                                                                | 6  | -51.33 | 84.85 | 117.33 | 6 |
| <b>Resistance to fluoroquinolones</b>                                       | DNA gyrase subunit B (EC 5.99.1.3)                                                                | 3  | -22.33 | 77.14 | 68.33  | 3 |
| <b>Resistance to fluoroquinolones</b>                                       | Topoisomerase IV subunit A (EC 5.99.1.-)                                                          | 4  | -16    | 82    | 54     | 4 |
| <b>Resistance to fluoroquinolones</b>                                       | Topoisomerase IV subunit B (EC 5.99.1.-)                                                          | 1  | -83    | 91.52 | 165    | 1 |
| <b>The <i>mdtABCD</i> multidrug resistance cluster</b>                      | Multidrug transporter MdtB                                                                        | 1  | -22    | 63.22 | 87     | 1 |

Supplementary information

|                                                 |                                                                    |    |       |       |       |   |
|-------------------------------------------------|--------------------------------------------------------------------|----|-------|-------|-------|---|
| <b>The mdtABCD multidrug resistance cluster</b> | Probable RND efflux membrane fusion protein                        | 65 | -8.88 | 64.15 | 50    | 5 |
| <b>The mdtABCD multidrug resistance cluster</b> | Probable RND efflux membrane fusion protein                        | 2  | -7.5  | 60.52 | 47.5  | 2 |
| <b>Zinc resistance</b>                          | Response regulator of zinc sigma-54-dependent two-component system | 8  | -9.14 | 63.91 | 47.29 | 5 |

Seed subsystems categorization level 1: Virulence, Disease and Defense, plus level 2: Resistance to antibiotics and toxic compounds. Metagenome entry: 4464109.3

**Supplementary Table S10.****Accession numbers and sizes of plasmids that were combined to the metagenome dataset PLASMIDS-NCBI.**

| Accession number             | size, bp | Accession number             | size, bp |
|------------------------------|----------|------------------------------|----------|
| gi 259647811 ref NC_013265.1 | 4955     | gi 85060490 ref NC_007715.1  | 10810    |
| gi 259647806 ref NC_013264.1 | 3070     | gi 85060466 ref NC_007714.1  | 27240    |
| gi 259910328 ref NC_013263.1 | 35909    | gi 85060411 ref NC_007713.1  | 83306    |
| gi 189458505 ref NC_010813.1 | 29037    | gi 84798614 ref NC_007706.1  | 3741     |
| gi 219882535 ref NC_011878.1 | 6054     | gi 116536719 ref NC_007682.3 | 56634    |
| gi 71725141 ref NC_007274.1  | 131950   | gi 83582730 ref NC_007641.1  | 53732    |
| gi 45478502 ref NC_005813.1  | 70159    | gi 81230333 ref NC_007595.1  | 46366    |
| gi 206479926 ref NC_011003.1 | 92661    | gi 78214253 ref NC_007515.1  | 13762    |
| gi 16082691 ref NC_003131.1  | 70305    | gi 78045242 ref NC_007505.1  | 19146    |
| gi 21392893 ref NC_003981.1  | 94829    | gi 78045239 ref NC_007504.1  | 1852     |
| gi 224371993 ref NC_012109.1 | 68709    | gi 77163517 ref NC_007483.1  | 40420    |
| gi 31795262 ref NC_004836.1  | 70504    | gi 76789623 ref NC_007430.1  | 7510     |
| gi 28558826 ref NC_004574.1  | 148650   | gi 73663802 ref NC_007352.1  | 22870    |
| gi 237640188 ref NC_012690.1 | 148105   | gi 73663756 ref NC_007351.1  | 38454    |
| gi 161867876 ref NC_010119.1 | 127212   | gi 71061431 ref NC_007203.1  | 6909     |
| gi 55275313 ref NC_006385.1  | 47829    | gi 71024880 ref NC_007191.1  | 8663     |
| gi 53793901 ref NC_006352.1  | 68869    | gi 70887539 ref NC_007190.1  | 10402    |
| gi 32469973 ref NC_004998.1  | 125491   | gi 70724934 ref NC_007188.1  | 10816    |
| gi 17233403 ref NC_003277.1  | 93939    | gi 70724927 ref NC_007187.1  | 10816    |
| gi 10957099 ref NC_002252.1  | 7258     | gi 70724907 ref NC_007186.1  | 19201    |
| gi 261888681 ref NC_013437.1 | 117047   | gi 70724886 ref NC_007185.1  | 27240    |
| gi 84310666 ref NC_007680.1  | 54344    | gi 70724865 ref NC_007184.1  | 27240    |
| gi 89142220 ref NC_007353.2  | 46557    | gi 68235689 ref NC_007143.1  | 2426     |
| gi 58383237 ref NC_006816.1  | 84514    | gi 68164390 ref NC_007142.1  | 3316     |
| gi 31795117 ref NC_004840.1  | 64508    | gi 67078390 ref NC_007107.1  | 9150     |
| gi 257070292 ref NC_013176.1 | 76494    | gi 67078381 ref NC_007106.1  | 8191     |

## Supplementary information

|                              |        |                              |        |
|------------------------------|--------|------------------------------|--------|
| gi 256855249 ref NC_013175.1 | 114222 | gi 67078326 ref NC_007105.1  | 53501  |
| gi 256367708 ref NC_013122.1 | 117536 | gi 67078320 ref NC_007104.1  | 5108   |
| gi 256367628 ref NC_013121.1 | 64471  | gi 66968610 ref NC_007093.1  | 8696   |
| gi 256367532 ref NC_013120.1 | 93732  | gi 66473484 ref NC_007068.1  | 2540   |
| gi 253723639 ref NC_012919.1 | 55851  | gi 63219713 ref NC_006994.1  | 10874  |
| gi 242348096 ref NC_012886.1 | 52637  | gi 63025539 ref NC_006989.1  | 1782   |
| gi 242347937 ref NC_012885.1 | 143963 | gi 63025535 ref NC_006988.1  | 3084   |
| gi 237797106 ref NC_012674.1 | 83042  | gi 63021982 ref NC_006979.1  | 28975  |
| gi 225166733 ref NC_012219.1 | 106981 | gi 62945219 ref NC_006975.1  | 3634   |
| gi 222104788 ref NC_011980.1 | 103275 | gi 62195105 ref NC_006910.1  | 11188  |
| gi 221218504 ref NC_011964.1 | 124705 | gi 62195071 ref NC_006909.1  | 28012  |
| gi 219586047 ref NC_011812.1 | 72946  | gi 62184636 ref NC_006904.1  | 3926   |
| gi 218203933 ref NC_011723.1 | 40786  | gi 60650141 ref NC_006873.1  | 36560  |
| gi 217388333 ref NC_011642.1 | 106527 | gi 60677300 ref NC_006872.1  | 36695  |
| gi 209947517 ref NC_011409.1 | 59393  | gi 60328255 ref NC_006868.1  | 5198   |
| gi 197103111 ref NC_011140.1 | 34616  | gi 51246971 ref NC_006139.1  | 121587 |
| gi 190606487 ref NC_010980.1 | 63135  | gi 58616073 ref NC_006829.1  | 9462   |
| gi 190014865 ref NC_010862.1 | 101558 | gi 58616068 ref NC_006828.1  | 5147   |
| gi 161598544 ref NC_010076.1 | 127923 | gi 113706804 ref NC_006827.2 | 67673  |
| gi 161598466 ref NC_010042.1 | 5674   | gi 58616718 ref NC_006826.1  | 5683   |
| gi 159528095 ref NC_009966.1 | 66512  | gi 58616139 ref NC_006825.1  | 6611   |
| gi 156144893 ref NC_009739.1 | 24179  | gi 58616147 ref NC_006822.1  | 1822   |
| gi 153971581 ref NC_009702.1 | 56628  | gi 58038467 ref NC_006675.1  | 13223  |
| gi 149930749 ref NC_009602.1 | 121239 | gi 58038418 ref NC_006673.1  | 26568  |
| gi 133756440 ref NC_009133.1 | 94289  | gi 56899872 ref NC_006578.1  | 77112  |
| gi 133756175 ref NC_009132.1 | 63946  | gi 56707090 ref NC_006571.1  | 36955  |
| gi 133755324 ref NC_009131.1 | 65288  | gi 56687495 ref NC_006528.1  | 846    |
| gi 124111993 ref NC_008821.1 | 39714  | gi 56410437 ref NC_006509.1  | 47890  |
| gi 121633825 ref NC_008768.1 | 39626  | gi 55978435 ref NC_006463.1  | 9322   |

## Supplementary information

|                              |        |                             |        |
|------------------------------|--------|-----------------------------|--------|
| gi 118601898 ref NC_008613.1 | 131520 | gi 55668080 ref NC_006400.1 | 14615  |
| gi 116256190 ref NC_008490.1 | 8985   | gi 55482307 ref NC_006399.1 | 2899   |
| gi 116006783 ref NC_008460.1 | 120730 | gi 54307184 ref NC_006377.1 | 36069  |
| gi 116006736 ref NC_008459.1 | 41268  | gi 54307232 ref NC_006376.1 | 2365   |
| gi 114881096 ref NC_008357.1 | 89147  | gi 54307228 ref NC_006375.1 | 1917   |
| gi 111116390 ref NC_008275.1 | 107929 | gi 54307181 ref NC_006374.1 | 2725   |
| gi 90969148 ref NC_007931.1  | 22787  | gi 54292907 ref NC_006366.1 | 59832  |
| gi 90576544 ref NC_007926.1  | 82232  | gi 54295843 ref NC_006365.1 | 131885 |
| gi 86559604 ref NC_007773.1  | 75268  | gi 54027809 ref NC_006363.1 | 87093  |
| gi 83404799 ref NC_007635.1  | 98396  | gi 52421262 ref NC_006298.1 | 5178   |
| gi 71559001 ref NC_007208.1  | 80156  | gi 52220778 ref NC_006278.1 | 7222   |
| gi 66968557 ref NC_007100.1  | 57121  | gi 51980887 ref NC_006258.1 | 5987   |
| gi 58000284 ref NC_006671.1  | 101375 | gi 51593942 ref NC_006154.1 | 27702  |
| gi 52788052 ref NC_006323.1  | 137036 | gi 51518800 ref NC_006145.1 | 1828   |
| gi 71754380 ref NC_006277.2  | 44420  | gi 51492513 ref NC_006143.1 | 84749  |
| gi 42761416 ref NC_005569.1  | 5721   | gi 51209513 ref NC_006135.1 | 45205  |
| gi 42761411 ref NC_005568.1  | 5721   | gi 51209432 ref NC_006134.1 | 44707  |
| gi 41057028 ref NC_005329.1  | 5568   | gi 51039021 ref NC_006130.1 | 3351   |
| gi 33416233 ref NC_005054.1  | 57889  | gi 49398098 ref NC_005951.1 | 20652  |
| gi 54145488 ref NC_004464.2  | 89468  | gi 49176951 ref NC_005923.1 | 6464   |
| gi 10955350 ref NC_002142.1  | 68817  | gi 49169775 ref NC_005922.1 | 4217   |
| gi 10955536 ref NC_002120.1  | 69673  | gi 49169764 ref NC_005921.1 | 8244   |
| gi 89142206 ref NC_007800.1  | 14969  | gi 49146768 ref NC_005920.1 | 4833   |
| gi 59939313 ref NC_006843.1  | 3624   | gi 49188571 ref NC_005919.1 | 40110  |
| gi 58383212 ref NC_006815.1  | 3208   | gi 49145920 ref NC_005917.1 | 12120  |
| gi 268380796 ref NC_013506.1 | 10270  | gi 49146358 ref NC_005915.1 | 49112  |
| gi 260874695 ref NC_013374.1 | 37564  | gi 49188487 ref NC_005914.1 | 2587   |
| gi 260871249 ref NC_013372.1 | 43807  | gi 49234743 ref NC_005913.1 | 10785  |
| gi 260620187 ref NC_013317.1 | 21806  | gi 49234735 ref NC_005911.1 | 5216   |



## Supplementary information

|                              |       |                             |        |
|------------------------------|-------|-----------------------------|--------|
| gi 261377406 ref NC_013281.1 | 10827 | gi 49188490 ref NC_005909.1 | 32743  |
| gi 260414727 ref NC_013280.1 | 5903  | gi 47104025 ref NC_005871.1 | 80033  |
| gi 260414721 ref NC_013279.1 | 3780  | gi 45368396 ref NC_005792.1 | 9328   |
| gi 260414711 ref NC_013278.1 | 5807  | gi 44680160 ref NC_005706.1 | 28185  |
| gi 260414701 ref NC_013277.1 | 10679 | gi 44003914 ref NC_005705.1 | 6868   |
| gi 253723602 ref NC_012916.1 | 2699  | gi 44003873 ref NC_005704.1 | 3377   |
| gi 240887305 ref NC_012813.1 | 8963  | gi 44003838 ref NC_005703.1 | 3476   |
| gi 148274163 ref NC_009476.1 | 24716 | gi 44003714 ref NC_005701.1 | 1669   |
| gi 145308057 ref NC_009352.1 | 18361 | gi 42761421 ref NC_005570.1 | 2682   |
| gi 134093278 ref NC_009137.1 | 16404 | gi 42761442 ref NC_005567.1 | 11365  |
| gi 126143259 ref NC_009034.1 | 5475  | gi 42761428 ref NC_005565.1 | 1288   |
| gi 124246786 ref NC_008823.1 | 7637  | gi 42761423 ref NC_005564.1 | 4397   |
| gi 119633054 ref NC_008691.1 | 5161  | gi 41057044 ref NC_005328.1 | 19167  |
| gi 118480576 ref NC_008594.1 | 5299  | gi 41056927 ref NC_005327.1 | 92353  |
| gi 114881553 ref NC_008356.1 | 2546  | gi 41178951 ref NC_005325.1 | 3510   |
| gi 114884166 ref NC_008354.1 | 3783  | gi 41178964 ref NC_005323.1 | 4449   |
| gi 114881871 ref NC_008353.1 | 2602  | gi 41057037 ref NC_005322.1 | 8144   |
| gi 114883965 ref NC_008352.1 | 2278  | gi 40804641 ref NC_005312.1 | 8124   |
| gi 114882150 ref NC_008351.1 | 2531  | gi 40804652 ref NC_005311.1 | 9150   |
| gi 114882495 ref NC_008350.1 | 5413  | gi 40445271 ref NC_005308.1 | 7853   |
| gi 110832850 ref NC_008259.1 | 7383  | gi 40445280 ref NC_005307.1 | 101016 |
| gi 110666910 ref NC_008247.1 | 4924  | gi 39840937 ref NC_005297.1 | 8427   |
| gi 104776491 ref NC_008053.1 | 3002  | gi 38638317 ref NC_005250.1 | 65009  |
| gi 104772061 ref NC_008052.1 | 4381  | gi 38638184 ref NC_005248.1 | 8145   |
| gi 104770349 ref NC_008051.1 | 4276  | gi 38638089 ref NC_005246.1 | 60145  |
| gi 104770113 ref NC_008050.1 | 3303  | gi 38638188 ref NC_005245.1 | 6286   |
| gi 104769599 ref NC_008049.1 | 1307  | gi 38639778 ref NC_005243.1 | 4608   |
| gi 90572619 ref NC_007927.1  | 20252 | gi 38639487 ref NC_005240.1 | 37106  |
| gi 86559681 ref NC_007771.1  | 2561  | gi 38505825 ref NC_005232.1 | 106004 |

## Supplementary information

|                             |       |                             |        |
|-----------------------------|-------|-----------------------------|--------|
| gi 86559537 ref NC_007770.1 | 2591  | gi 38505775 ref NC_005231.1 | 44343  |
| gi 86559540 ref NC_007769.1 | 2841  | gi 38505668 ref NC_005230.1 | 103307 |
| gi 86559678 ref NC_007768.1 | 2361  | gi 38257120 ref NC_005208.1 | 2779   |
| gi 82749772 ref NC_007621.1 | 4040  | gi 52220924 ref NC_005207.2 | 30201  |
| gi 76789632 ref NC_007431.1 | 12652 | gi 37595761 ref NC_005127.1 | 21845  |
| gi 75906199 ref NC_007392.1 | 35318 | gi 34915981 ref NC_005098.1 | 2911   |
| gi 75906174 ref NC_007391.1 | 27778 | gi 34328027 ref NC_005076.1 | 17108  |
| gi 75906156 ref NC_007390.1 | 20224 | gi 32470341 ref NC_005023.1 | 19792  |
| gi 75906141 ref NC_007389.1 | 19325 | gi 32470434 ref NC_005022.1 | 3161   |
| gi 75906130 ref NC_007388.1 | 14407 | gi 32470430 ref NC_005021.1 | 3162   |
| gi 75906117 ref NC_007387.1 | 12989 | gi 32470383 ref NC_005020.1 | 2979   |
| gi 75906108 ref NC_007386.1 | 7790  | gi 32470115 ref NC_005019.1 | 6293   |
| gi 71558993 ref NC_007207.1 | 4661  | gi 32470129 ref NC_005018.1 | 4196   |
| gi 70724727 ref NC_007167.1 | 5550  | gi 32470270 ref NC_005017.1 | 67720  |
| gi 70724724 ref NC_007166.1 | 3552  | gi 32470123 ref NC_005015.1 | 7086   |
| gi 70724721 ref NC_007165.1 | 5767  | gi 32470448 ref NC_005013.1 | 9759   |
| gi 66968624 ref NC_007099.1 | 4244  | gi 32469969 ref NC_005009.1 | 2297   |
| gi 66968618 ref NC_007098.1 | 3156  | gi 32470555 ref NC_005005.1 | 17261  |
| gi 66968670 ref NC_007097.1 | 4556  | gi 32470532 ref NC_005004.1 | 24365  |
| gi 66968659 ref NC_007096.1 | 11115 | gi 32470491 ref NC_005001.1 | 15100  |
| gi 66968649 ref NC_007095.1 | 8751  | gi 32469820 ref NC_004997.1 | 4013   |
| gi 66968640 ref NC_007094.1 | 8632  | gi 32455378 ref NC_004991.1 | 1440   |
| gi 62945224 ref NC_006976.1 | 5317  | gi 32455387 ref NC_004989.1 | 2120   |
| gi 62543257 ref NC_006968.1 | 4150  | gi 32455306 ref NC_004988.1 | 16933  |
| gi 62464797 ref NC_006959.1 | 3649  | gi 32455360 ref NC_004987.1 | 1851   |
| gi 62184588 ref NC_006912.1 | 39360 | gi 32455408 ref NC_004986.1 | 2100   |
| gi 62184550 ref NC_006911.1 | 35159 | gi 32455502 ref NC_004985.1 | 2862   |
| gi 62464764 ref NC_006907.1 | 28878 | gi 32455410 ref NC_004984.1 | 8018   |
| gi 61965911 ref NC_006881.1 | 8318  | gi 32455390 ref NC_004982.1 | 4719   |

## Supplementary information

|                              |        |                              |       |
|------------------------------|--------|------------------------------|-------|
| gi 61199610 ref NC_006877.1  | 9540   | gi 118213250 ref NC_004981.2 | 2047  |
| gi 60677337 ref NC_006871.1  | 6913   | gi 32455498 ref NC_004979.1  | 1882  |
| gi 60683787 ref NC_006870.1  | 14218  | gi 32456048 ref NC_004978.1  | 4960  |
| gi 60677292 ref NC_006869.1  | 9698   | gi 32455406 ref NC_004977.1  | 1527  |
| gi 60202126 ref NC_006860.1  | 4906   | gi 32455396 ref NC_004974.1  | 5887  |
| gi 60202130 ref NC_006857.1  | 1447   | gi 32455896 ref NC_004973.1  | 10687 |
| gi 57790535 ref NC_006628.1  | 8266   | gi 32455363 ref NC_004972.1  | 8288  |
| gi 56707135 ref NC_006530.1  | 44013  | gi 32455274 ref NC_004971.1  | 21170 |
| gi 56707107 ref NC_006529.1  | 20417  | gi 32455909 ref NC_004969.1  | 3138  |
| gi 55733695 ref NC_006427.1  | 2235   | gi 32455430 ref NC_004968.1  | 2672  |
| gi 49457772 ref NC_005952.1  | 23381  | gi 32455421 ref NC_004967.1  | 2345  |
| gi 47176959 ref NC_005873.1  | 133058 | gi 32455473 ref NC_004966.1  | 20331 |
| gi 41056918 ref NC_005324.1  | 6222   | gi 32455369 ref NC_004965.1  | 7212  |
| gi 38639856 ref NC_005242.1  | 11066  | gi 32455760 ref NC_004964.1  | 4194  |
| gi 31790972 ref NC_004833.1  | 1488   | gi 32455733 ref NC_004963.1  | 22688 |
| gi 30387210 ref NC_004774.1  | 19934  | gi 32455404 ref NC_004962.1  | 1410  |
| gi 29294591 ref NC_004653.1  | 7264   | gi 32455895 ref NC_004961.1  | 6886  |
| gi 29294585 ref NC_004652.1  | 7302   | gi 32455446 ref NC_004960.1  | 7858  |
| gi 10955436 ref NC_002145.1  | 1549   | gi 32455434 ref NC_004959.1  | 10836 |
| gi 226316799 ref NC_006970.2 | 2773   | gi 32455464 ref NC_004955.1  | 10899 |
| gi 226315872 ref NC_006969.2 | 4367   | gi 32455920 ref NC_004954.1  | 50709 |
| gi 288986931 ref NC_013862.1 | 39929  | gi 32455771 ref NC_004953.1  | 7580  |
| gi 288947674 ref NC_013852.1 | 102242 | gi 32455353 ref NC_004952.1  | 3990  |
| gi 224985746 ref NC_012208.1 | 4357   | gi 32455890 ref NC_004951.1  | 5128  |
| gi 288557107 ref NC_013793.1 | 105029 | gi 32455337 ref NC_004950.1  | 10970 |
| gi 21264228 ref NC_003922.1  | 64920  | gi 32455321 ref NC_004949.1  | 18291 |
| gi 22855171 ref NC_004163.1  | 7344   | gi 32455530 ref NC_004947.1  | 4392  |
| gi 288551649 ref NC_013789.1 | 2968   | gi 32455516 ref NC_004942.1  | 12959 |
| gi 288551646 ref NC_013783.1 | 1594   | gi 32455535 ref NC_004941.1  | 5949  |

## Supplementary information

|                              |       |                             |       |
|------------------------------|-------|-----------------------------|-------|
| gi 288551643 ref NC_013782.1 | 3071  | gi 32455381 ref NC_004940.1 | 1711  |
| gi 288551640 ref NC_013780.1 | 3680  | gi 32479367 ref NC_004939.1 | 51409 |
| gi 288551622 ref NC_013779.1 | 18219 | gi 32455782 ref NC_004938.1 | 1786  |
| gi 288551484 ref NC_013776.1 | 2334  | gi 32455752 ref NC_004937.1 | 8713  |
| gi 288551475 ref NC_013775.1 | 9631  | gi 32456025 ref NC_004931.1 | 12855 |
| gi 62184640 ref NC_006903.1  | 5045  | gi 32455457 ref NC_004930.1 | 3854  |
| gi 58033143 ref NC_003921.3  | 33700 | gi 32455972 ref NC_004929.1 | 76093 |
| gi 10956616 ref NC_002115.1  | 4457  | gi 31983847 ref NC_004854.1 | 80610 |
| gi 288353388 ref NC_013787.1 | 32400 | gi 31983517 ref NC_004850.1 | 8140  |
| gi 288457843 ref NC_013788.1 | 30952 | gi 31983511 ref NC_004849.1 | 8716  |
| gi 288353366 ref NC_013786.1 | 32801 | gi 31983499 ref NC_004847.1 | 13433 |
| gi 288353335 ref NC_013785.1 | 33915 | gi 31983465 ref NC_004846.1 | 32433 |
| gi 288353283 ref NC_013784.1 | 37066 | gi 31983001 ref NC_004845.1 | 7817  |
| gi 288289942 ref NC_013778.1 | 2545  | gi 31982989 ref NC_004843.1 | 2308  |
| gi 281485108 ref NC_013652.1 | 2330  | gi 31790962 ref NC_004832.1 | 8971  |
| gi 159046676 ref NC_009959.1 | 72296 | gi 31442392 ref NC_004822.1 | 4226  |
| gi 159046605 ref NC_009958.1 | 86208 | gi 30984504 ref NC_004811.1 | 3407  |
| gi 75905472 ref NC_004526.2  | 3539  | gi 30387198 ref NC_004773.1 | 11946 |
| gi 24210992 ref NC_004338.1  | 6371  | gi 30387192 ref NC_004772.1 | 5252  |
| gi 23307864 ref NC_004253.1  | 3661  | gi 30387185 ref NC_004771.1 | 6792  |
| gi 23307853 ref NC_004252.1  | 10073 | gi 30387442 ref NC_004770.1 | 3538  |
| gi 113911683 ref NC_001272.2 | 6578  | gi 30387438 ref NC_004769.1 | 3684  |
| gi 31795327 ref NC_004837.1  | 9610  | gi 30387429 ref NC_004768.1 | 10224 |
| gi 284803266 ref NC_013767.1 | 77054 | gi 30387182 ref NC_004767.1 | 3955  |
| gi 284006004 ref NC_013738.1 | 6072  | gi 30090016 ref NC_004747.1 | 3531  |
| gi 284005992 ref NC_013737.1 | 7308  | gi 30027757 ref NC_004734.1 | 14155 |
| gi 284005967 ref NC_013736.1 | 7683  | gi 29826443 ref NC_004719.1 | 94287 |
| gi 284005954 ref NC_013735.1 | 8651  | gi 29377895 ref NC_004671.1 | 57660 |
| gi 284005939 ref NC_013734.1 | 9965  | gi 29377876 ref NC_004670.1 | 17963 |

## Supplementary information

|                              |        |                             |       |
|------------------------------|--------|-----------------------------|-------|
| gi 284005898 ref NC_013733.1 | 36434  | gi 29377803 ref NC_004669.1 | 66320 |
| gi 284005755 ref NC_013732.1 | 146936 | gi 28373195 ref NC_004566.1 | 19389 |
| gi 284000133 ref NC_013728.1 | 111481 | gi 28261693 ref NC_004562.1 | 2650  |
| gi 283826834 ref NC_013727.1 | 70275  | gi 28191365 ref NC_004555.1 | 2399  |
| gi 283826923 ref NC_013726.1 | 24235  | gi 27753647 ref NC_004532.1 | 4523  |
| gi 283777746 ref NC_013717.1 | 54449  | gi 27733905 ref NC_004528.1 | 9935  |
| gi 260667574 ref NC_013352.1 | 23983  | gi 27733883 ref NC_004527.1 | 3431  |
| gi 260667573 ref NC_013351.1 | 26016  | gi 27356618 ref NC_004458.1 | 5648  |
| gi 260667572 ref NC_013350.1 | 2241   | gi 27356620 ref NC_004457.1 | 40991 |
| gi 260667571 ref NC_013349.1 | 16428  | gi 27228439 ref NC_004446.1 | 2825  |
| gi 260667570 ref NC_013348.1 | 45052  | gi 27228683 ref NC_004445.1 | 35904 |
| gi 260667569 ref NC_013347.1 | 22694  | gi 27228729 ref NC_004443.1 | 3624  |
| gi 260667568 ref NC_013346.1 | 2396   | gi 25592039 ref NC_004429.1 | 6349  |
| gi 260667567 ref NC_013345.1 | 3961   | gi 24323604 ref NC_004345.1 | 1338  |
| gi 260667566 ref NC_013344.1 | 44116  | gi 90577187 ref NC_004341.2 | 3353  |
| gi 260667565 ref NC_013343.1 | 43892  | gi 24211005 ref NC_004340.1 | 5249  |
| gi 260667564 ref NC_013342.1 | 47322  | gi 24210997 ref NC_004339.1 | 5424  |
| gi 260667563 ref NC_013341.1 | 13342  | gi 23955957 ref NC_004335.1 | 8254  |
| gi 260667562 ref NC_013340.1 | 35114  | gi 23955953 ref NC_004334.1 | 6829  |
| gi 260667561 ref NC_013339.1 | 42198  | gi 23464590 ref NC_004308.1 | 2723  |
| gi 260667560 ref NC_013338.1 | 50500  | gi 23217023 ref NC_004164.2 | 7412  |
| gi 260667559 ref NC_013337.1 | 30857  | gi 21644711 ref NC_004059.1 | 4671  |
| gi 260667558 ref NC_013336.1 | 4498   | gi 21628923 ref NC_004058.1 | 32379 |
| gi 260667557 ref NC_013335.1 | 22987  | gi 21233964 ref NC_003904.1 | 31317 |
| gi 260667556 ref NC_013334.1 | 39308  | gi 21218443 ref NC_003894.1 | 9253  |
| gi 260667555 ref NC_013333.1 | 20453  | gi 21218441 ref NC_003893.1 | 2061  |
| gi 260667554 ref NC_013332.1 | 32445  | gi 33695266 ref NC_003892.2 | 5924  |
| gi 260667553 ref NC_013331.1 | 28974  | gi 20800428 ref NC_003846.1 | 5936  |
| gi 260667552 ref NC_013330.1 | 28384  | gi 20514397 ref NC_003789.1 | 3564  |

## Supplementary information

|                              |        |                             |        |
|------------------------------|--------|-----------------------------|--------|
| gi 260667551 ref NC_013329.1 | 38045  | gi 20069863 ref NC_003528.1 | 4523   |
| gi 260667550 ref NC_013328.1 | 30047  | gi 20069876 ref NC_003527.1 | 4488   |
| gi 260667549 ref NC_013327.1 | 38087  | gi 20069861 ref NC_003526.1 | 2331   |
| gi 260667452 ref NC_013326.1 | 33702  | gi 19848304 ref NC_003490.1 | 14875  |
| gi 260667421 ref NC_013325.1 | 38204  | gi 19774233 ref NC_003486.1 | 11354  |
| gi 260667403 ref NC_013324.1 | 29646  | gi 19718333 ref NC_003458.1 | 13913  |
| gi 260666220 ref NC_013323.1 | 33660  | gi 19482139 ref NC_003442.1 | 10904  |
| gi 260666193 ref NC_013322.1 | 27435  | gi 18450232 ref NC_003374.1 | 4340   |
| gi 260666163 ref NC_013321.1 | 32650  | gi 18249852 ref NC_003353.1 | 4278   |
| gi 260666135 ref NC_013320.1 | 50429  | gi 18077875 ref NC_003319.1 | 7686   |
| gi 260666110 ref NC_013319.1 | 29254  | gi 17232874 ref NC_003273.1 | 55414  |
| gi 260666101 ref NC_013318.1 | 27267  | gi 17227465 ref NC_003270.1 | 40340  |
| gi 283488383 ref NC_013718.1 | 39265  | gi 17227374 ref NC_003267.1 | 101965 |
| gi 270208386 ref NC_013540.1 | 7975   | gi 17227177 ref NC_003265.1 | 38211  |
| gi 169786809 ref NC_010394.1 | 23319  | gi 17158061 ref NC_003241.1 | 5584   |
| gi 283454955 ref NC_013719.1 | 3910   | gi 17158057 ref NC_003239.1 | 4191   |
| gi 239835334 ref NC_012797.1 | 58704  | gi 17158077 ref NC_003227.1 | 27856  |
| gi 239828745 ref NC_012795.1 | 8867   | gi 16519565 ref NC_003201.1 | 2544   |
| gi 238651159 ref NC_012732.1 | 26406  | gi 16119200 ref NC_003140.1 | 24653  |
| gi 226464389 ref NC_012547.1 | 54000  | gi 15983528 ref NC_003125.1 | 4242   |
| gi 222530721 ref NC_012037.1 | 3653   | gi 15983520 ref NC_003124.1 | 11823  |
| gi 222530712 ref NC_012036.1 | 8291   | gi 15983531 ref NC_003123.1 | 11851  |
| gi 218711035 ref NC_011754.1 | 119594 | gi 15617466 ref NC_003101.1 | 8278   |
| gi 218511148 ref NC_011752.1 | 72482  | gi 15530173 ref NC_003099.1 | 3948   |
| gi 218692794 ref NC_011749.1 | 122301 | gi 15426254 ref NC_003091.1 | 4975   |
| gi 218534477 ref NC_011747.1 | 133853 | gi 15426257 ref NC_003090.1 | 4109   |
| gi 218561636 ref NC_011743.1 | 55150  | gi 15320554 ref NC_003080.1 | 14323  |
| gi 218454959 ref NC_011739.1 | 33809  | gi 14602220 ref NC_002810.1 | 5658   |
| gi 161986673 ref NC_010124.1 | 38818  | gi 14589348 ref NC_002809.1 | 5210   |

## Supplementary information

|                              |        |                             |        |
|------------------------------|--------|-----------------------------|--------|
| gi 161986651 ref NC_010123.1 | 16610  | gi 14518304 ref NC_002806.1 | 101648 |
| gi 157149574 ref NC_009791.1 | 5033   | gi 14327908 ref NC_002799.1 | 4640   |
| gi 157149504 ref NC_009790.1 | 74224  | gi 14327898 ref NC_002798.1 | 7784   |
| gi 157149498 ref NC_009789.1 | 6199   | gi 14141858 ref NC_002776.1 | 4139   |
| gi 157149429 ref NC_009788.1 | 70609  | gi 14141961 ref NC_002775.1 | 7617   |
| gi 157149399 ref NC_009787.1 | 34367  | gi 14141823 ref NC_002774.1 | 25107  |
| gi 157149330 ref NC_009786.1 | 79237  | gi 14010740 ref NC_002760.1 | 4379   |
| gi 121583582 ref NC_008764.1 | 6459   | gi 13937263 ref NC_002757.1 | 5640   |
| gi 121583564 ref NC_008763.1 | 9898   | gi 13449233 ref NC_002699.1 | 22437  |
| gi 121583543 ref NC_008762.1 | 21611  | gi 13128938 ref NC_002675.1 | 3325   |
| gi 121583484 ref NC_008761.1 | 58808  | gi 12746569 ref NC_002664.1 | 1065   |
| gi 121583343 ref NC_008760.1 | 143747 | gi 12383033 ref NC_002650.1 | 3649   |
| gi 99077902 ref NC_008042.1  | 130973 | gi 12084924 ref NC_002637.1 | 4992   |
| gi 92109663 ref NC_007961.1  | 121408 | gi 12084800 ref NC_002636.1 | 5112   |
| gi 282162657 ref NC_013667.1 | 14288  | gi 12039046 ref NC_002635.1 | 3625   |
| gi 282167195 ref NC_013666.1 | 99448  | gi 11995221 ref NC_002632.1 | 4675   |
| gi 268796558 ref NC_013519.1 | 13648  | gi 11342754 ref NC_002611.1 | 6868   |
| gi 281427968 ref NC_013657.1 | 37510  | gi 11342748 ref NC_002610.1 | 5258   |
| gi 281427745 ref NC_013653.1 | 41715  | gi 11036628 ref NC_002580.1 | 3555   |
| gi 281190708 ref NC_013636.1 | 6114   | gi 10956617 ref NC_002576.1 | 80609  |
| gi 271972120 ref NC_013596.1 | 28204  | gi 10956700 ref NC_002569.1 | 1022   |
| gi 268318460 ref NC_013503.1 | 42644  | gi 10955438 ref NC_002525.1 | 75582  |
| gi 270312296 ref NC_013589.1 | 5159   | gi 10957111 ref NC_002524.1 | 10687  |
| gi 242347931 ref NC_012882.1 | 6751   | gi 10954624 ref NC_002518.1 | 2534   |
| gi 10956149 ref NC_002157.1  | 8007   | gi 10956174 ref NC_002517.1 | 20719  |
| gi 10956147 ref NC_002156.1  | 8007   | gi 10956233 ref NC_002502.1 | 8694   |
| gi 270118167 ref NC_013551.1 | 13332  | gi 10957079 ref NC_002498.1 | 5643   |
| gi 270208715 ref NC_013550.1 | 17334  | gi 10957073 ref NC_002497.1 | 4807   |
| gi 270208709 ref NC_013549.1 | 6521   | gi 10955964 ref NC_002473.1 | 8784   |

## Supplementary information

|                              |        |                             |       |
|------------------------------|--------|-----------------------------|-------|
| gi 270208707 ref NC_013548.1 | 2306   | gi 10957103 ref NC_002253.1 | 7786  |
| gi 270208693 ref NC_013547.1 | 9897   | gi 7597489 ref NC_002193.1  | 3826  |
| gi 270208688 ref NC_013546.1 | 5486   | gi 7597478 ref NC_002192.1  | 2178  |
| gi 270208527 ref NC_013545.1 | 144170 | gi 10957566 ref NC_002182.1 | 7501  |
| gi 270208517 ref NC_013544.1 | 8554   | gi 10956221 ref NC_002150.1 | 6159  |
| gi 270208493 ref NC_013543.1 | 19882  | gi 10957082 ref NC_002149.1 | 9367  |
| gi 270208397 ref NC_013542.1 | 70057  | gi 10956564 ref NC_002148.1 | 1987  |
| gi 270208395 ref NC_013541.1 | 2140   | gi 10956390 ref NC_002146.1 | 96231 |
| gi 270208382 ref NC_013539.1 | 4738   | gi 10955834 ref NC_002144.1 | 5919  |
| gi 270118147 ref NC_013538.1 | 5841   | gi 10954622 ref NC_002143.1 | 15398 |
| gi 270208376 ref NC_013537.1 | 6704   | gi 10956086 ref NC_002141.1 | 1511  |
| gi 270208362 ref NC_013534.1 | 6817   | gi 10956187 ref NC_002140.1 | 4975  |
| gi 270208272 ref NC_013533.1 | 80600  | gi 10956069 ref NC_002139.1 | 4692  |
| gi 217322921 ref NC_011656.1 | 45173  | gi 10954645 ref NC_001431.1 | 2241  |
| gi 217316512 ref NC_011654.1 | 12481  | gi 10956229 ref NC_002138.1 | 6159  |
| gi 269958148 ref NC_013531.1 | 88604  | gi 9507667 ref NC_002137.1  | 42810 |
| gi 268318455 ref NC_013500.1 | 4658   | gi 10956209 ref NC_002136.1 | 5842  |
| gi 268793183 ref NC_013518.1 | 54160  | gi 10956570 ref NC_002133.1 | 5750  |
| gi 268687599 ref NC_013516.1 | 10702  | gi 10954614 ref NC_002132.1 | 2311  |
| gi 269124235 ref NC_013514.1 | 27815  | gi 10956020 ref NC_002131.1 | 32601 |
| gi 269124269 ref NC_013513.1 | 5575   | gi 10956162 ref NC_002129.1 | 4557  |
| gi 268593652 ref NC_013509.1 | 43703  | gi 10955262 ref NC_002127.1 | 3306  |
| gi 262260515 ref NC_013453.1 | 17256  | gi 10956560 ref NC_002123.1 | 2295  |
| gi 262225767 ref NC_013452.1 | 4440   | gi 10955982 ref NC_002118.1 | 37329 |
| gi 262225764 ref NC_013451.1 | 1442   | gi 10957088 ref NC_002117.1 | 7553  |
| gi 261599111 ref NC_013419.1 | 3448   | gi 10956813 ref NC_002114.1 | 1910  |
| gi 260150468 ref NC_010847.2 | 18563  | gi 10956811 ref NC_002113.1 | 1823  |
| gi 268507159 ref NC_013507.1 | 67094  | gi 10956689 ref NC_002112.1 | 9014  |
| gi 268318538 ref NC_013505.1 | 25652  | gi 10954629 ref NC_001399.1 | 6633  |



## Supplementary information

|                              |        |                             |       |
|------------------------------|--------|-----------------------------|-------|
| gi 268318345 ref NC_013502.1 | 125133 | gi 10954608 ref NC_001476.1 | 12887 |
| gi 224992331 ref NC_012209.1 | 14662  | gi 10956798 ref NC_002111.1 | 3966  |
| gi 98152871 ref NC_008036.1  | 28543  | gi 10957087 ref NC_001316.1 | 1313  |
| gi 210135770 ref NC_011499.1 | 10225  | gi 10955177 ref NC_001315.1 | 1921  |
| gi 260738835 ref NC_013358.1 | 4551   | gi 10954605 ref NC_002110.1 | 3520  |
| gi 260738802 ref NC_013357.1 | 40818  | gi 10954617 ref NC_002109.1 | 4442  |
| gi 260712883 ref NC_013356.1 | 53380  | gi 10956546 ref NC_002102.1 | 19360 |
| gi 262225358 ref NC_013449.1 | 85518  | gi 10955250 ref NC_001537.1 | 3895  |
| gi 262225316 ref NC_013448.1 | 4326   | gi 10956588 ref NC_001385.1 | 4448  |
| gi 262118100 ref NC_013442.1 | 81410  | gi 10956703 ref NC_002100.1 | 2645  |
| gi 169834533 ref NC_010379.1 | 148780 | gi 10956610 ref NC_002099.1 | 2444  |
| gi 261876182 ref NC_013438.1 | 31045  | gi 10956155 ref NC_002096.1 | 4118  |
| gi 187935795 ref NC_010680.1 | 47642  | gi 10956072 ref NC_002095.1 | 14636 |
| gi 110666922 ref NC_008226.1 | 7881   | gi 10956242 ref NC_002094.1 | 3874  |
| gi 260899099 ref NC_013395.1 | 2418   | gi 10956775 ref NC_002093.1 | 3117  |
| gi 260899098 ref NC_013394.1 | 4607   | gi 10956531 ref NC_002091.1 | 5415  |
| gi 260899096 ref NC_013392.1 | 2422   | gi 10955963 ref NC_002088.1 | 4839  |
| gi 260894455 ref NC_013391.1 | 4572   | gi 10956066 ref NC_001520.1 | 4104  |
| gi 260894454 ref NC_013390.1 | 6206   | gi 10956528 ref NC_001446.1 | 7649  |
| gi 260894452 ref NC_013388.1 | 8226   | gi 10956112 ref NC_001277.1 | 19515 |
| gi 260874705 ref NC_013384.1 | 6794   | gi 10955174 ref NC_001275.1 | 5123  |
| gi 260874703 ref NC_013382.1 | 10445  | gi 11497445 ref NC_000957.1 | 5228  |
| gi 260874701 ref NC_013380.1 | 8435   | gi 11497372 ref NC_000956.1 | 52971 |
| gi 260874699 ref NC_013378.1 | 16775  | gi 11497360 ref NC_000955.1 | 18753 |
| gi 261736022 ref NC_013420.1 | 90435  | gi 11497325 ref NC_000954.1 | 30651 |
| gi 261597705 ref NC_013417.1 | 7516   | gi 11497281 ref NC_000953.1 | 30885 |
| gi 261420908 ref NC_013412.1 | 45057  | gi 11497236 ref NC_000952.1 | 30800 |
| gi 255929166 ref NC_013091.1 | 3936   | gi 11497193 ref NC_000951.1 | 29838 |
| gi 260899097 ref NC_013393.1 | 23263  | gi 11497103 ref NC_000949.1 | 30223 |

## Supplementary information

|                              |        |                             |       |
|------------------------------|--------|-----------------------------|-------|
| gi 260894453 ref NC_013389.1 | 24518  | gi 11497060 ref NC_000948.1 | 30750 |
| gi 260894451 ref NC_013387.1 | 32487  | gi 10956200 ref NC_000938.1 | 3498  |
| gi 260893985 ref NC_013386.1 | 27830  | gi 10956194 ref NC_000937.1 | 9531  |
| gi 260871126 ref NC_013370.1 | 97897  | gi 60461906 ref NC_000906.2 | 8506  |
| gi 50233940 ref NC_005970.1  | 5360   | gi 10957030 ref NC_000923.1 | 6076  |
| gi 260874704 ref NC_013383.1 | 24711  | gi 10956512 ref NC_002075.1 | 7949  |
| gi 260874702 ref NC_013381.1 | 42623  | gi 10957023 ref NC_002070.1 | 3661  |
| gi 260874700 ref NC_013379.1 | 38556  | gi 10956061 ref NC_002002.1 | 6281  |
| gi 260874698 ref NC_013377.1 | 26236  | gi 10956171 ref NC_001995.1 | 1551  |
| gi 260874697 ref NC_013376.1 | 1552   | gi 10956168 ref NC_001994.1 | 1658  |
| gi 260874696 ref NC_013375.1 | 3011   | gi 10956085 ref NC_001974.1 | 2514  |
| gi 260874694 ref NC_013373.1 | 64909  | gi 10957125 ref NC_001949.1 | 60232 |
| gi 260871248 ref NC_013371.1 | 9968   | gi 10954454 ref NC_001911.1 | 7768  |
| gi 260763802 ref NC_013369.1 | 85167  | gi 10954446 ref NC_001910.1 | 7967  |
| gi 260751919 ref NC_013368.1 | 6673   | gi 11497048 ref NC_001904.1 | 9386  |
| gi 260751908 ref NC_013367.1 | 8140   | gi 10957015 ref NC_001898.1 | 5229  |
| gi 260751835 ref NC_013366.1 | 77690  | gi 10957041 ref NC_001880.1 | 39456 |
| gi 260751828 ref NC_013363.1 | 5686   | gi 10956475 ref NC_001858.1 | 7028  |
| gi 260751930 ref NC_013362.1 | 63365  | gi 11496831 ref NC_001856.1 | 38829 |
| gi 260718930 ref NC_013354.1 | 75546  | gi 11496664 ref NC_001852.1 | 29766 |
| gi 260600006 ref NC_013285.1 | 53842  | gi 11496637 ref NC_001851.1 | 26921 |
| gi 260585138 ref NC_013284.1 | 22448  | gi 11496583 ref NC_001849.1 | 16823 |
| gi 260424375 ref NC_013283.1 | 138339 | gi 10955181 ref NC_001845.1 | 1680  |
| gi 258513334 ref NC_013215.1 | 1815   | gi 10956203 ref NC_001797.1 | 6437  |
| gi 258513331 ref NC_013214.1 | 3035   | gi 10956581 ref NC_001791.1 | 4885  |
| gi 258513327 ref NC_013213.1 | 3204   | gi 10956566 ref NC_001787.1 | 2439  |
| gi 258513263 ref NC_013212.1 | 49961  | gi 10955975 ref NC_001774.1 | 5360  |
| gi 238478313 ref NC_012722.1 | 2424   | gi 10956826 ref NC_001772.1 | 2450  |
| gi 194447124 ref NC_011078.1 | 46121  | gi 10956151 ref NC_001767.1 | 4439  |

## Supplementary information

|                              |        |                              |        |
|------------------------------|--------|------------------------------|--------|
| gi 194446987 ref NC_011077.1 | 101461 | gi 10956503 ref NC_001766.1  | 8737   |
| gi 194446816 ref NC_011076.1 | 146811 | gi 10956497 ref NC_001765.1  | 5807   |
| gi 258509940 ref NC_013200.1 | 64508  | gi 10956489 ref NC_001764.1  | 7837   |
| gi 258406618 ref NC_013224.1 | 45263  | gi 10956144 ref NC_001763.1  | 6024   |
| gi 257793135 ref NC_013208.1 | 7907   | gi 10956690 ref NC_001759.1  | 11143  |
| gi 257793042 ref NC_013207.1 | 87298  | gi 10956137 ref NC_001758.1  | 1768   |
| gi 257792943 ref NC_013206.1 | 91726  | gi 10956562 ref NC_001757.1  | 5113   |
| gi 257074491 ref NC_013191.1 | 37695  | gi 10954600 ref NC_001756.1  | 3506   |
| gi 257074450 ref NC_013190.1 | 42325  | gi 10956795 ref NC_001755.1  | 2935   |
| gi 256041893 ref NC_013128.1 | 48220  | gi 10956779 ref NC_002061.1  | 1509   |
| gi 257070394 ref NC_013178.1 | 6075   | gi 10956083 ref NC_002060.1  | 2287   |
| gi 256823891 ref NC_013168.1 | 11263  | gi 10956682 ref NC_001738.1  | 11696  |
| gi 256823861 ref NC_013167.1 | 22723  | gi 10956079 ref NC_001597.1  | 4993   |
| gi 256821123 ref NC_013164.1 | 115566 | gi 10956578 ref NC_001456.1  | 3054   |
| gi 257062240 ref NC_013163.1 | 23870  | gi 10956139 ref NC_002013.1  | 2910   |
| gi 256818682 ref NC_013160.1 | 75678  | gi 228478451 ref NC_012634.1 | 12377  |
| gi 256055273 ref NC_013130.1 | 53786  | gi 209395529 ref NC_011350.1 | 94644  |
| gi 256041951 ref NC_013129.1 | 52916  | gi 206575367 ref NC_011281.1 | 91096  |
| gi 46518338 ref NC_005862.1  | 6066   | gi 203288416 ref NC_011258.1 | 36869  |
| gi 23577986 ref NC_004320.1  | 48672  | gi 203288272 ref NC_011246.1 | 123937 |
| gi 23577970 ref NC_004319.1  | 23743  | gi 203284761 ref NC_011225.1 | 31548  |
| gi 255929160 ref NC_013090.1 | 4029   | gi 203283903 ref NC_011224.1 | 11226  |
| gi 255929170 ref NC_013092.1 | 5072   | gi 198241636 ref NC_011204.1 | 74551  |
| gi 255767879 ref NC_003320.2 | 18664  | gi 194733773 ref NC_011092.1 | 110227 |
| gi 14141971 ref NC_002773.1  | 3179   | gi 194447175 ref NC_011081.1 | 91374  |
| gi 255529909 ref NC_013056.1 | 8771   | gi 190571886 ref NC_010982.1 | 32623  |
| gi 254764804 ref NC_013034.1 | 14365  | gi 189913115 ref NC_010846.1 | 74117  |
| gi 254732688 ref NC_013033.1 | 3592   | gi 189913450 ref NC_010844.1 | 74116  |
| gi 254564253 ref NC_012989.1 | 38579  | gi 189426689 ref NC_010815.1 | 77113  |

## Supplementary information

|                              |        |                              |        |
|------------------------------|--------|------------------------------|--------|
| gi 254558118 ref NC_012987.1 | 141504 | gi 186897495 ref NC_010635.1 | 69812  |
| gi 254667448 ref NC_013010.1 | 94601  | gi 170745005 ref NC_010509.1 | 47003  |
| gi 254295496 ref NC_012983.1 | 84492  | gi 170783447 ref NC_010494.1 | 99213  |
| gi 209921952 ref NC_011419.1 | 100021 | gi 170650760 ref NC_010488.1 | 130440 |
| gi 209921875 ref NC_011416.1 | 60555  | gi 170780376 ref NC_010481.1 | 29823  |
| gi 209916829 ref NC_011413.1 | 91158  | gi 160873076 ref NC_010000.1 | 49148  |
| gi 209916825 ref NC_011411.1 | 4082   | gi 159046469 ref NC_009957.1 | 126304 |
| gi 209916817 ref NC_011408.1 | 5366   | gi 153012113 ref NC_009672.1 | 57138  |
| gi 209916806 ref NC_011407.1 | 6929   | gi 153012026 ref NC_009671.1 | 93589  |
| gi 254028270 ref NC_012972.1 | 9816   | gi 153011934 ref NC_009670.1 | 101491 |
| gi 254003128 ref NC_012970.1 | 76680  | gi 118445179 ref NC_008598.1 | 55939  |
| gi 253825511 ref NC_012961.1 | 29330  | gi 116334879 ref NC_008499.1 | 35595  |
| gi 253771310 ref NC_012946.1 | 107690 | gi 116334867 ref NC_008498.1 | 13413  |
| gi 253771260 ref NC_012945.1 | 54152  | gi 115345530 ref NC_008386.1 | 106469 |
| gi 253800975 ref NC_012944.1 | 138362 | gi 111074118 ref NC_008274.1 | 26533  |
| gi 253750612 ref NC_012923.1 | 24579  | gi 87159847 ref NC_007792.1  | 37136  |
| gi 215538592 ref NC_011316.1 | 4327   | gi 190572013 ref NC_010891.1 | 55216  |
| gi 161508245 ref NC_010066.1 | 20413  | gi 190410636 ref NC_010851.1 | 54288  |
| gi 242134074 ref NC_012859.1 | 3504   | gi 188574176 ref NC_010720.1 | 75089  |
| gi 241258150 ref NC_012851.1 | 51398  | gi 170016236 ref NC_010466.1 | 31463  |
| gi 240851420 ref NC_012847.1 | 28192  | gi 148243977 ref NC_009469.1 | 88953  |
| gi 77404588 ref NC_007487.1  | 3637   | gi 118577427 ref NC_008608.1 | 30722  |
| gi 77404485 ref NC_007486.1  | 104014 | gi 115345482 ref NC_008385.1 | 43581  |
| gi 68535050 ref NC_007171.1  | 8180   | gi 10957530 ref NC_000959.1  | 45704  |
| gi 68535047 ref NC_007170.1  | 2366   | gi 227811309 ref NC_012577.1 | 94875  |
| gi 68535043 ref NC_007169.1  | 2300   | gi 194335117 ref NC_011061.1 | 66772  |
| gi 32453780 ref NC_004925.1  | 5247   | gi 190571920 ref NC_010935.1 | 91181  |
| gi 32453769 ref NC_004924.1  | 5616   | gi 183013904 ref NC_010599.1 | 71777  |
| gi 32453760 ref NC_004923.1  | 5424   | gi 169647022 ref NC_010422.1 | 74589  |

## Supplementary information

|                              |        |                              |        |
|------------------------------|--------|------------------------------|--------|
| gi 240114607 ref NC_012810.1 | 24943  | gi 126090319 ref NC_009037.1 | 16762  |
| gi 240141741 ref NC_012809.1 | 37858  | gi 126090118 ref NC_009035.1 | 116763 |
| gi 240111940 ref NC_012807.1 | 44195  | gi 116662341 ref NC_008539.1 | 96488  |
| gi 238899346 ref NC_012752.1 | 59032  | gi 116662232 ref NC_008538.1 | 115507 |
| gi 239828713 ref NC_012794.1 | 33899  | gi 116326645 ref NC_008507.1 | 14206  |
| gi 239812973 ref NC_012790.1 | 10287  | gi 116326609 ref NC_008506.1 | 47208  |
| gi 238897249 ref NC_012733.1 | 1920   | gi 116326547 ref NC_008505.1 | 74750  |
| gi 238909104 ref NC_012782.1 | 60455  | gi 116326540 ref NC_008504.1 | 9554   |
| gi 238903491 ref NC_012760.1 | 8060   | gi 110347349 ref NC_008244.1 | 47561  |
| gi 238899401 ref NC_012758.1 | 7628   | gi 110347235 ref NC_008243.1 | 131247 |
| gi 238028977 ref NC_012725.1 | 134349 | gi 75812629 ref NC_007411.1  | 35762  |
| gi 238025581 ref NC_012723.1 | 133591 | gi 72384244 ref NC_007337.1  | 87688  |
| gi 238023394 ref NC_012720.1 | 141067 | gi 71725269 ref NC_007275.1  | 51711  |
| gi 238023296 ref NC_012718.1 | 141792 | gi 67459862 ref NC_007111.1  | 39263  |
| gi 224504235 ref NC_012124.1 | 55414  | gi 67459793 ref NC_007110.1  | 62829  |
| gi 217322982 ref NC_011657.1 | 3091   | gi 58038448 ref NC_006674.1  | 14547  |
| gi 197313565 ref NC_011151.1 | 80610  | gi 57854744 ref NC_006663.1  | 27310  |
| gi 71558958 ref NC_007206.1  | 32628  | gi 51038597 ref NC_006128.1  | 27108  |
| gi 32470355 ref NC_005011.1  | 20654  | gi 49176863 ref NC_005912.1  | 87688  |
| gi 29839220 ref NC_004720.1  | 7966   | gi 31795449 ref NC_004839.1  | 70559  |
| gi 229599876 ref NC_012657.1 | 9953   | gi 31795333 ref NC_004838.1  | 100990 |
| gi 229599623 ref NC_012655.1 | 94830  | gi 31795183 ref NC_004835.1  | 100984 |
| gi 228404350 ref NC_012631.1 | 7502   | gi 18450286 ref NC_003383.1  | 81905  |
| gi 228404341 ref NC_012630.1 | 7169   | gi 10955434 ref NC_002487.1  | 5847   |
| gi 228301246 ref NC_012629.1 | 7506   | gi 184152625 ref NC_010604.1 | 23317  |
| gi 228298843 ref NC_012627.1 | 7502   | gi 170783423 ref NC_010500.1 | 6478   |
| gi 228298555 ref NC_012626.1 | 7471   | gi 167643928 ref NC_010332.1 | 40457  |
| gi 228292900 ref NC_012625.1 | 7493   | gi 121582553 ref NC_008766.1 | 63609  |
| gi 226526990 ref NC_012552.1 | 3471   | gi 116255067 ref NC_008383.1 | 147463 |

## Supplementary information

|                              |        |                              |        |
|------------------------------|--------|------------------------------|--------|
| gi 226334772 ref NC_012523.1 | 111160 | gi 29171478 ref NC_004633.1  | 73661  |
| gi 225631039 ref NC_012417.1 | 3125   | gi 29171546 ref NC_004632.1  | 67473  |
| gi 225350699 ref NC_012226.1 | 35940  | gi 10956711 ref NC_002490.1  | 51158  |
| gi 225268106 ref NC_012222.1 | 14443  | gi 11497007 ref NC_001903.1  | 26498  |
| gi 225166856 ref NC_012220.1 | 2112   | gi 215528069 ref NC_011617.1 | 67850  |
| gi 222528047 ref NC_012031.1 | 10153  | gi 211909952 ref NC_011514.1 | 10669  |
| gi 222143522 ref NC_012003.1 | 2968   | gi 211909945 ref NC_011513.1 | 3805   |
| gi 222143513 ref NC_012002.1 | 4061   | gi 209901144 ref NC_011385.1 | 75617  |
| gi 222143330 ref NC_012001.1 | 4226   | gi 209901056 ref NC_011383.1 | 70655  |
| gi 222143325 ref NC_012000.1 | 4398   | gi 209901031 ref NC_011382.1 | 23753  |
| gi 222142648 ref NC_011998.1 | 3417   | gi 195546273 ref NC_011101.1 | 34522  |
| gi 222142646 ref NC_011997.1 | 2131   | gi 190570396 ref NC_010919.1 | 45909  |
| gi 222142576 ref NC_011996.1 | 80545  | gi 190576837 ref NC_010886.1 | 98264  |
| gi 222142561 ref NC_011995.1 | 15667  | gi 189009163 ref NC_010726.1 | 41723  |
| gi 220927410 ref NC_011895.1 | 37542  | gi 187729584 ref NC_010643.1 | 39792  |
| gi 220920000 ref NC_011893.1 | 40463  | gi 187729868 ref NC_010614.1 | 82266  |
| gi 220915115 ref NC_011890.1 | 9829   | gi 187729705 ref NC_010600.1 | 65158  |
| gi 220915101 ref NC_011889.1 | 12638  | gi 187729840 ref NC_010523.1 | 29924  |
| gi 220915079 ref NC_011888.1 | 20286  | gi 170780412 ref NC_010419.1 | 35380  |
| gi 219883409 ref NC_011882.1 | 34726  | gi 165975445 ref NC_010259.1 | 8197   |
| gi 219684028 ref NC_011836.1 | 59182  | gi 75994447 ref NC_007414.1  | 92077  |
| gi 218534717 ref NC_011760.1 | 22617  | gi 70724800 ref NC_007183.1  | 81553  |
| gi 218442342 ref NC_011734.1 | 15219  | gi 70724735 ref NC_007182.1  | 81553  |
| gi 218442325 ref NC_011733.1 | 18083  | gi 58616617 ref NC_006830.1  | 98192  |
| gi 218442305 ref NC_011732.1 | 22636  | gi 49188520 ref NC_005918.1  | 46697  |
| gi 218442241 ref NC_011730.1 | 29239  | gi 45368547 ref NC_005793.1  | 76958  |
| gi 218249153 ref NC_011727.1 | 16601  | gi 38638158 ref NC_005247.1  | 30314  |
| gi 218203844 ref NC_011721.1 | 50894  | gi 38505535 ref NC_005229.1  | 119895 |
| gi 217980264 ref NC_011668.1 | 65448  | gi 38257032 ref NC_005205.1  | 72601  |

## Supplementary information

|                              |       |                              |        |
|------------------------------|-------|------------------------------|--------|
| gi 217980115 ref NC_011667.1 | 78374 | gi 34500478 ref NC_005088.1  | 67066  |
| gi 217975697 ref NC_011665.1 | 59223 | gi 32470385 ref NC_005024.1  | 46445  |
| gi 217975547 ref NC_011664.1 | 88311 | gi 32469878 ref NC_004999.1  | 83042  |
| gi 215276192 ref NC_011603.1 | 97978 | gi 32455785 ref NC_004956.1  | 108845 |
| gi 215274578 ref NC_011602.1 | 6147  | gi 19352339 ref NC_003430.1  | 79370  |
| gi 212550319 ref NC_011564.1 | 37560 | gi 18150858 ref NC_003350.1  | 116580 |
| gi 212550314 ref NC_011563.1 | 4149  | gi 14010707 ref NC_002759.1  | 39554  |
| gi 212550288 ref NC_011562.1 | 31893 | gi 113911681 ref NC_001735.4 | 53423  |
| gi 212550259 ref NC_011561.1 | 37111 | gi 211909964 ref NC_011521.1 | 6062   |
| gi 209542158 ref NC_011367.1 | 27455 | gi 166153441 ref NC_010279.1 | 39041  |
| gi 209809832 ref NC_011315.1 | 5360  | gi 165975434 ref NC_010261.1 | 8197   |
| gi 209967944 ref NC_011314.1 | 30807 | gi 16082781 ref NC_003134.1  | 96210  |
| gi 215778350 ref NC_011311.1 | 83540 | gi 10955266 ref NC_002128.1  | 92721  |
| gi 169786864 ref NC_010398.1 | 24922 | gi 226938550 ref NC_012562.1 | 3338   |
| gi 169786833 ref NC_010396.1 | 25014 | gi 222112705 ref NC_011994.1 | 44420  |
| gi 229593500 ref NC_012661.1 | 6320  | gi 222109117 ref NC_011991.1 | 130435 |
| gi 229587265 ref NC_012642.1 | 7078  | gi 222102329 ref NC_011986.1 | 78730  |
| gi 229587261 ref NC_012641.1 | 3338  | gi 219398133 ref NC_011796.1 | 7635   |
| gi 188535954 ref NC_010699.1 | 44694 | gi 226526941 ref NC_012551.1 | 65037  |
| gi 189017121 ref NC_010697.1 | 48751 | gi 226526933 ref NC_012550.1 | 8881   |
| gi 188535911 ref NC_010696.1 | 35494 | gi 226526930 ref NC_012549.1 | 3524   |
| gi 188535903 ref NC_010695.1 | 9299  | gi 226526927 ref NC_012548.1 | 1815   |
| gi 188535863 ref NC_010693.1 | 46159 | gi 87159843 ref NC_007791.1  | 4439   |
| gi 169546404 ref NC_010406.1 | 3837  | gi 87159837 ref NC_007790.1  | 3125   |
| gi 169546397 ref NC_010405.1 | 4485  | gi 50163691 ref NC_007323.3  | 94830  |
| gi 169786889 ref NC_010404.1 | 94413 | gi 226315826 ref NC_012518.1 | 31433  |
| gi 169302992 ref NC_010403.1 | 2726  | gi 226315791 ref NC_012517.1 | 22534  |
| gi 169302980 ref NC_010402.1 | 9661  | gi 226315743 ref NC_012510.1 | 30414  |
| gi 169302972 ref NC_010401.1 | 5644  | gi 226315693 ref NC_012508.1 | 38696  |

Supplementary information

|                              |       |                              |        |
|------------------------------|-------|------------------------------|--------|
| gi 169302963 ref NC_010395.1 | 6106  | gi 226315656 ref NC_012502.1 | 29870  |
| gi 169544164 ref NC_010377.1 | 95499 | gi 226315638 ref NC_012500.1 | 17032  |
| gi 162145842 ref NC_010111.1 | 4555  | gi 226315596 ref NC_012498.1 | 34551  |
| gi 161722698 ref NC_010098.1 | 2820  | gi 226315579 ref NC_012497.1 | 17941  |
| gi 161612312 ref NC_010097.1 | 2661  | gi 226315535 ref NC_012496.1 | 36936  |
| gi 161722693 ref NC_010096.1 | 5541  | gi 226246913 ref NC_012516.1 | 27704  |
| gi 161598472 ref NC_010069.1 | 5673  | gi 226246867 ref NC_012515.1 | 30597  |
| gi 161598658 ref NC_010065.1 | 2051  | gi 226246825 ref NC_012514.1 | 29694  |
| gi 161598463 ref NC_010064.1 | 2004  | gi 226246796 ref NC_012513.1 | 26537  |
| gi 161598482 ref NC_010029.1 | 7501  | gi 226246769 ref NC_012512.1 | 26523  |
| gi 161598460 ref NC_010021.1 | 2749  | gi 226246726 ref NC_012511.1 | 30617  |
| gi 161376719 ref NC_010010.1 | 26300 | gi 226246684 ref NC_012509.1 | 30186  |
| gi 157502088 ref NC_009841.1 | 67159 | gi 226246490 ref NC_012507.1 | 31052  |
| gi 156522740 ref NC_009751.1 | 29871 | gi 226246472 ref NC_012506.1 | 17287  |
| gi 153971667 ref NC_009703.1 | 66946 | gi 226246402 ref NC_012505.1 | 53849  |
| gi 148245107 ref NC_009466.1 | 59182 | gi 226234833 ref NC_012504.1 | 53655  |
| gi 145294016 ref NC_009344.1 | 8953  | gi 226234710 ref NC_012503.1 | 24093  |
| gi 145297095 ref NC_009343.1 | 49120 | gi 226234403 ref NC_012501.1 | 29469  |
| gi 138898339 ref NC_009329.1 | 57693 | gi 226234374 ref NC_012499.1 | 28812  |
| gi 133757280 ref NC_009128.1 | 34606 | gi 226234339 ref NC_012495.1 | 30159  |
| gi 126640109 ref NC_009084.1 | 11302 | gi 226234306 ref NC_012494.1 | 28200  |
| gi 126640097 ref NC_009083.1 | 13408 | gi 190570391 ref NC_010896.1 | 8271   |
| gi 122815790 ref NC_008791.1 | 67721 | gi 32470134 ref NC_005014.1  | 120826 |
| gi 121999251 ref NC_008790.1 | 45025 | gi 197313496 ref NC_011150.1 | 79251  |
| gi 121582657 ref NC_008770.1 | 37473 | gi 225685337 ref NC_012439.1 | 53682  |
| gi 118480566 ref NC_008597.1 | 6222  | gi 225622133 ref NC_012260.1 | 29457  |
| gi 116256179 ref NC_008489.1 | 7462  | gi 225622088 ref NC_012259.1 | 30816  |
| gi 116256159 ref NC_008488.1 | 5219  | gi 225622042 ref NC_012257.1 | 30341  |
| gi 116256156 ref NC_008487.1 | 4091  | gi 225621996 ref NC_012255.1 | 30162  |



## Supplementary information

|                              |        |                              |       |
|------------------------------|--------|------------------------------|-------|
| gi 116256154 ref NC_008486.1 | 1902   | gi 225621961 ref NC_012249.1 | 21082 |
| gi 115534260 ref NC_008444.1 | 3172   | gi 225621889 ref NC_012247.1 | 52543 |
| gi 115534270 ref NC_008439.1 | 8401   | gi 225621868 ref NC_012243.1 | 18209 |
| gi 115534241 ref NC_008438.1 | 3212   | gi 225621834 ref NC_012239.1 | 21708 |
| gi 115534291 ref NC_008436.1 | 3602   | gi 225621813 ref NC_012238.1 | 24765 |
| gi 91984624 ref NC_007956.1  | 6610   | gi 225621783 ref NC_012237.1 | 18110 |
| gi 91206245 ref NC_007941.1  | 114230 | gi 225621665 ref NC_012234.1 | 83377 |
| gi 90969145 ref NC_007928.1  | 2756   | gi 225621634 ref NC_012232.1 | 27759 |
| gi 86559543 ref NC_007772.1  | 70480  | gi 225621594 ref NC_012230.1 | 36518 |
| gi 81330251 ref NC_007594.1  | 52890  | gi 225621562 ref NC_012229.1 | 17205 |
| gi 78045265 ref NC_007506.1  | 38116  | gi 225578915 ref NC_012269.1 | 8696  |
| gi 77404776 ref NC_007490.1  | 100828 | gi 225576407 ref NC_012268.1 | 30171 |
| gi 77404693 ref NC_007489.1  | 105284 | gi 225576379 ref NC_012267.1 | 26496 |
| gi 77404592 ref NC_007488.1  | 114178 | gi 225576335 ref NC_012266.1 | 30611 |
| gi 71558996 ref NC_007209.1  | 2473   | gi 225576292 ref NC_012265.1 | 29578 |
| gi 68164394 ref NC_007141.1  | 45210  | gi 225576249 ref NC_012264.1 | 30117 |
| gi 66968629 ref NC_007101.1  | 13374  | gi 225576221 ref NC_012263.1 | 26507 |
| gi 64204282 ref NC_006997.1  | 3682   | gi 225576194 ref NC_012262.1 | 17070 |
| gi 62868688 ref NC_006974.1  | 4431   | gi 225576166 ref NC_012261.1 | 26526 |
| gi 44003802 ref NC_005702.1  | 2665   | gi 225576122 ref NC_012258.1 | 30433 |
| gi 32470516 ref NC_005025.1  | 4809   | gi 225576112 ref NC_012256.1 | 8692  |
| gi 32470508 ref NC_005016.1  | 12868  | gi 225576069 ref NC_012254.1 | 30648 |
| gi 32455425 ref NC_004958.1  | 4230   | gi 225575982 ref NC_012253.1 | 60942 |
| gi 30250494 ref NC_004758.1  | 7245   | gi 225575940 ref NC_012252.1 | 30053 |
| gi 28191370 ref NC_004554.1  | 1346   | gi 225575896 ref NC_012251.1 | 30858 |
| gi 27764599 ref NC_004534.1  | 6758   | gi 225575853 ref NC_012250.1 | 29459 |
| gi 22789219 ref NC_004160.1  | 2697   | gi 225575832 ref NC_012248.1 | 27336 |
| gi 21326195 ref NC_003969.1  | 2391   | gi 225574035 ref NC_012246.1 | 28234 |
| gi 19225058 ref NC_003425.1  | 5280   | gi 225573901 ref NC_012245.1 | 27241 |

## Supplementary information

|                              |        |                              |       |
|------------------------------|--------|------------------------------|-------|
| gi 10956541 ref NC_002191.1  | 6127   | gi 225573828 ref NC_012244.1 | 53756 |
| gi 10956807 ref NC_002175.1  | 1995   | gi 225571769 ref NC_012242.1 | 20219 |
| gi 10956803 ref NC_002130.1  | 5609   | gi 225571702 ref NC_012241.1 | 54027 |
| gi 10956792 ref NC_002108.1  | 2062   | gi 225571661 ref NC_012240.1 | 29802 |
| gi 10955179 ref NC_002098.1  | 7426   | gi 225553165 ref NC_012236.1 | 28746 |
| gi 10956704 ref NC_002092.1  | 1296   | gi 225552789 ref NC_012235.1 | 28038 |
| gi 10954603 ref NC_001843.1  | 1222   | gi 225548778 ref NC_012233.1 | 29233 |
| gi 10956058 ref NC_001760.1  | 3130   | gi 225548747 ref NC_012231.1 | 26181 |
| gi 10956485 ref NC_002062.1  | 1883   | gi 225380186 ref NC_012228.1 | 25799 |
| gi 10955533 ref NC_002056.1  | 9263   | gi 225380155 ref NC_012227.1 | 18181 |
| gi 10956535 ref NC_001670.1  | 7921   | gi 28372983 ref NC_004564.1  | 66591 |
| gi 10956825 ref NC_001425.1  | 10992  | gi 42761430 ref NC_005566.1  | 8013  |
| gi 10956823 ref NC_001379.1  | 3292   | gi 28894860 ref NC_004604.1  | 53903 |
| gi 162417732 ref NC_010157.1 | 68190  | gi 222692192 ref NC_012035.1 | 8021  |
| gi 152973731 ref NC_009651.1 | 88582  | gi 222554303 ref NC_012033.1 | 6206  |
| gi 152973607 ref NC_009650.1 | 107576 | gi 222159142 ref NC_012006.1 | 7560  |
| gi 108793642 ref NC_008122.1 | 70299  | gi 222098966 ref NC_011977.1 | 7577  |
| gi 113911685 ref NC_006153.2 | 68525  | gi 196259845 ref NC_011131.1 | 12084 |
| gi 11497149 ref NC_000950.1  | 30299  | gi 152973842 ref NC_009673.1 | 7135  |
| gi 228860919 ref NC_012628.1 | 4031   | gi 29648114 ref NC_004704.1  | 37393 |
| gi 189009811 ref NC_010716.1 | 38150  | gi 221642582 ref NC_011975.1 | 17016 |
| gi 158341503 ref NC_009933.1 | 120693 | gi 221317035 ref NC_011974.1 | 26522 |
| gi 108793837 ref NC_008119.1 | 10778  | gi 221316992 ref NC_011972.1 | 30016 |
| gi 108793732 ref NC_008118.1 | 100918 | gi 221316922 ref NC_011971.1 | 52766 |
| gi 82524664 ref NC_007608.1  | 126697 | gi 221316878 ref NC_011970.1 | 30101 |
| gi 60115514 ref NC_006856.1  | 138742 | gi 221316839 ref NC_011968.1 | 27704 |
| gi 60115462 ref NC_006855.1  | 49558  | gi 221641554 ref NC_011967.1 | 30324 |
| gi 49489772 ref NC_005908.1  | 3728   | gi 221316817 ref NC_011966.1 | 12870 |
| gi 32456039 ref NC_004936.1  | 5622   | gi 221316774 ref NC_011965.1 | 30117 |

## Supplementary information

|                              |       |                              |        |
|------------------------------|-------|------------------------------|--------|
| gi 32455611 ref NC_004934.1  | 96742 | gi 221634492 ref NC_011960.1 | 103355 |
| gi 28373131 ref NC_004565.1  | 74082 | gi 212208405 ref NC_011526.1 | 39280  |
| gi 16082679 ref NC_003132.1  | 9612  | gi 172034905 ref NC_010543.1 | 10244  |
| gi 10954409 ref NC_002579.1  | 25407 | gi 172034885 ref NC_010542.1 | 14685  |
| gi 225166728 ref NC_012216.1 | 6033  | gi 172034859 ref NC_010541.1 | 31856  |
| gi 225074880 ref NC_012215.1 | 4237  | gi 172034820 ref NC_010539.1 | 39620  |
| gi 224985707 ref NC_012204.1 | 23914 | gi 154688247 ref NC_009726.1 | 54179  |
| gi 224797079 ref NC_012203.1 | 29418 | gi 221101559 ref NC_011897.1 | 4270   |
| gi 224985625 ref NC_012202.1 | 54623 | gi 10955253 ref NC_002119.1  | 9957   |
| gi 224985588 ref NC_012201.1 | 27763 | gi 156936546 ref NC_009780.1 | 131196 |
| gi 224985557 ref NC_012200.1 | 25308 | gi 156936507 ref NC_009779.1 | 31208  |
| gi 224797010 ref NC_012199.1 | 53263 | gi 116326529 ref NC_008503.1 | 14041  |
| gi 224796975 ref NC_012198.1 | 27581 | gi 116326493 ref NC_008496.1 | 37367  |
| gi 224985524 ref NC_012197.1 | 26634 | gi 59714356 ref NC_006842.1  | 45849  |
| gi 224985475 ref NC_012196.1 | 28984 | gi 219873355 ref NC_011877.1 | 58069  |
| gi 224796939 ref NC_012195.1 | 29782 | gi 219807266 ref NC_011876.1 | 53885  |
| gi 224796867 ref NC_012194.1 | 54021 | gi 219788340 ref NC_011875.1 | 25791  |
| gi 224796797 ref NC_012193.1 | 53686 | gi 219787826 ref NC_011874.1 | 28770  |
| gi 224796790 ref NC_012192.1 | 5252  | gi 219873306 ref NC_011873.1 | 27689  |
| gi 224985251 ref NC_012191.1 | 18115 | gi 219786705 ref NC_011872.1 | 26705  |
| gi 224984898 ref NC_012190.1 | 29429 | gi 219783938 ref NC_011871.1 | 22433  |
| gi 224984853 ref NC_012189.1 | 30134 | gi 219873279 ref NC_011870.1 | 23638  |
| gi 224796770 ref NC_012188.1 | 15386 | gi 219873194 ref NC_011869.1 | 41906  |
| gi 224984815 ref NC_012187.1 | 28237 | gi 219873154 ref NC_011868.1 | 30302  |
| gi 224984782 ref NC_012186.1 | 28128 | gi 219873044 ref NC_011867.1 | 35446  |
| gi 224984639 ref NC_012185.1 | 81995 | gi 219724123 ref NC_011866.1 | 27342  |
| gi 224984588 ref NC_012184.1 | 36826 | gi 219872619 ref NC_011865.1 | 17849  |
| gi 224984542 ref NC_012183.1 | 28035 | gi 219723614 ref NC_011864.1 | 24159  |
| gi 224984485 ref NC_012182.1 | 39007 | gi 219872598 ref NC_011863.1 | 24910  |

## Supplementary information

|                              |       |                              |       |
|------------------------------|-------|------------------------------|-------|
| gi 224984452 ref NC_012181.1 | 24828 | gi 219872568 ref NC_011862.1 | 29501 |
| gi 224796743 ref NC_012180.1 | 20024 | gi 219723586 ref NC_011861.1 | 20872 |
| gi 224796718 ref NC_012179.1 | 16600 | gi 219872498 ref NC_011860.1 | 40280 |
| gi 224796681 ref NC_012178.1 | 24661 | gi 219872422 ref NC_011859.1 | 56869 |
| gi 224984381 ref NC_012177.1 | 53953 | gi 219872400 ref NC_011858.1 | 17609 |
| gi 224984345 ref NC_012176.1 | 20932 | gi 219723532 ref NC_011857.1 | 36709 |
| gi 224796611 ref NC_012175.1 | 53783 | gi 219872346 ref NC_011856.1 | 32543 |
| gi 224796587 ref NC_012174.1 | 26776 | gi 219723496 ref NC_011855.1 | 27006 |
| gi 224984256 ref NC_012173.1 | 30185 | gi 219872301 ref NC_011854.1 | 38262 |
| gi 224984213 ref NC_012172.1 | 29630 | gi 219723247 ref NC_011853.1 | 26522 |
| gi 224796548 ref NC_012171.1 | 27543 | gi 219723204 ref NC_011851.1 | 30280 |
| gi 224984172 ref NC_012170.1 | 27775 | gi 219723162 ref NC_011850.1 | 30439 |
| gi 224796528 ref NC_012169.1 | 18022 | gi 219723117 ref NC_011849.1 | 30300 |
| gi 224984135 ref NC_012168.1 | 30663 | gi 219723073 ref NC_011848.1 | 29694 |
| gi 224984072 ref NC_012167.1 | 38893 | gi 219723030 ref NC_011847.1 | 30946 |
| gi 224984009 ref NC_012166.1 | 32795 | gi 219723010 ref NC_011846.1 | 14883 |
| gi 224983832 ref NC_012165.1 | 26992 | gi 219870062 ref NC_011845.1 | 21329 |
| gi 224796457 ref NC_012164.1 | 56055 | gi 219869986 ref NC_011842.1 | 34837 |
| gi 224796422 ref NC_012163.1 | 28645 | gi 219869942 ref NC_011841.1 | 30652 |
| gi 224611703 ref NC_012162.1 | 13540 | gi 219857292 ref NC_011839.1 | 33333 |
| gi 224983786 ref NC_012161.1 | 30052 | gi 219722982 ref NC_011844.1 | 26994 |
| gi 224983743 ref NC_012160.1 | 30017 | gi 219722940 ref NC_011843.1 | 30293 |
| gi 224593710 ref NC_012159.1 | 29756 | gi 219718436 ref NC_011840.1 | 27040 |
| gi 224593666 ref NC_012158.1 | 30408 | gi 219372367 ref NC_011799.1 | 5217  |
| gi 224593637 ref NC_012157.1 | 26511 | gi 219372197 ref NC_011798.1 | 2396  |
| gi 224593595 ref NC_012156.1 | 30088 | gi 219372116 ref NC_011797.1 | 7472  |
| gi 224591586 ref NC_012155.1 | 8706  | gi 219372021 ref NC_011795.1 | 6148  |
| gi 224591544 ref NC_012154.1 | 29762 | gi 219364624 ref NC_011792.1 | 33534 |
| gi 224591517 ref NC_012153.1 | 18338 | gi 219364539 ref NC_011790.1 | 31266 |

## Supplementary information

|                              |       |                              |        |
|------------------------------|-------|------------------------------|--------|
| gi 224591472 ref NC_012152.1 | 30290 | gi 219364474 ref NC_011789.1 | 26020  |
| gi 224591444 ref NC_012151.1 | 26506 | gi 219364337 ref NC_011788.1 | 32041  |
| gi 224590735 ref NC_012150.1 | 30772 | gi 219405371 ref NC_011783.1 | 24326  |
| gi 224590692 ref NC_012149.1 | 29912 | gi 218884802 ref NC_011767.1 | 5620   |
| gi 224590649 ref NC_012148.1 | 30026 | gi 218906779 ref NC_011785.1 | 28885  |
| gi 224586575 ref NC_012133.1 | 27732 | gi 218875581 ref NC_011782.1 | 17266  |
| gi 224586545 ref NC_012132.1 | 26217 | gi 218875456 ref NC_011781.1 | 28414  |
| gi 224586487 ref NC_012131.1 | 27367 | gi 218875340 ref NC_011780.1 | 23422  |
| gi 224586532 ref NC_012130.1 | 9474  | gi 218868768 ref NC_011779.1 | 29758  |
| gi 224586459 ref NC_012129.1 | 26875 | gi 218868668 ref NC_011778.1 | 36852  |
| gi 224586416 ref NC_012128.1 | 23419 | gi 218848179 ref NC_011776.1 | 3091   |
| gi 224022940 ref NC_012114.1 | 30755 | gi 218847808 ref NC_011774.1 | 140001 |
| gi 224022898 ref NC_012113.1 | 29673 | gi 218847796 ref NC_011771.1 | 10915  |
| gi 224022856 ref NC_012112.1 | 30260 | gi 218685645 ref NC_011746.1 | 2467   |
| gi 224022812 ref NC_012111.1 | 30884 | gi 218534615 ref NC_011759.1 | 94967  |
| gi 224022638 ref NC_012110.1 | 30327 | gi 208435470 ref NC_011334.1 | 10031  |
| gi 224020464 ref NC_012107.1 | 22471 | gi 82703928 ref NC_007617.1  | 14159  |
| gi 223987672 ref NC_012106.1 | 61062 | gi 82703911 ref NC_007616.1  | 17036  |
| gi 224020419 ref NC_012105.1 | 30375 | gi 82703893 ref NC_007615.1  | 18871  |
| gi 223987644 ref NC_012104.1 | 26525 | gi 218203897 ref NC_011722.1 | 30467  |
| gi 223868608 ref NC_012090.1 | 3062  | gi 218202726 ref NC_011720.1 | 48168  |
| gi 223868602 ref NC_012089.1 | 3932  | gi 189485779 ref NS_000194.1 | 5362   |
| gi 223868594 ref NC_012088.1 | 7005  | gi 189485775 ref NS_000193.1 | 5701   |
| gi 219053343 ref NC_011794.1 | 33405 | gi 189485765 ref NS_000192.1 | 11650  |
| gi 219052319 ref NC_011793.1 | 23261 | gi 217076130 ref NC_011652.1 | 1970   |
| gi 219049287 ref NC_011791.1 | 30270 | gi 216997724 ref NC_011651.1 | 31017  |
| gi 219048252 ref NC_011787.1 | 28763 | gi 216996631 ref NC_011649.1 | 30810  |
| gi 218964018 ref NC_011786.1 | 60749 | gi 216969075 ref NC_011648.1 | 31157  |
| gi 219499124 ref NC_011784.1 | 53615 | gi 216968420 ref NC_011647.1 | 31475  |

## Supplementary information

|                              |       |                              |        |
|------------------------------|-------|------------------------------|--------|
| gi 218442394 ref NC_011736.1 | 30964 | gi 216967777 ref NC_011641.1 | 68018  |
| gi 218442354 ref NC_011735.1 | 29806 | gi 216996016 ref NC_011640.1 | 4211   |
| gi 218442268 ref NC_011731.1 | 30330 | gi 216700335 ref NC_011604.1 | 10908  |
| gi 218203978 ref NC_011724.1 | 26514 | gi 47060311 ref NC_004073.2  | 46366  |
| gi 216997227 ref NC_011650.1 | 26535 | gi 215400687 ref NC_011610.1 | 6068   |
| gi 211774469 ref NC_006977.1 | 4555  | gi 215401543 ref NC_011605.1 | 5713   |
| gi 209808774 ref NC_011364.1 | 65029 | gi 210062465 ref NC_011422.1 | 27037  |
| gi 209395638 ref NC_011351.1 | 37452 | gi 189016698 ref NC_010408.1 | 94791  |
| gi 193885688 ref NC_011030.1 | 2461  | gi 189016631 ref NC_010399.1 | 50350  |
| gi 192351290 ref NC_010993.1 | 10107 | gi 148271110 ref NC_009479.1 | 69989  |
| gi 190710335 ref NC_010983.1 | 3869  | gi 148245183 ref NC_009478.1 | 27357  |
| gi 190151409 ref NC_010942.1 | 5685  | gi 213155358 ref NC_011585.1 | 8729   |
| gi 190151404 ref NC_010941.1 | 4236  | gi 212383450 ref NC_011522.1 | 7904   |
| gi 190151401 ref NC_010940.1 | 3533  | gi 184160017 ref NC_010606.1 | 64366  |
| gi 190571865 ref NC_010938.1 | 3350  | gi 184159988 ref NC_010605.1 | 28279  |
| gi 190015736 ref NC_010937.1 | 47263 | gi 211909938 ref NC_011512.1 | 4840   |
| gi 190571843 ref NC_010936.1 | 4973  | gi 211909932 ref NC_011511.1 | 3679   |
| gi 190570331 ref NC_010932.1 | 8108  | gi 211774475 ref NC_010164.1 | 4892   |
| gi 190570373 ref NC_010931.1 | 5768  | gi 210136675 ref NC_011497.1 | 2111   |
| gi 190571851 ref NC_010930.1 | 5206  | gi 126464805 ref NC_009040.1 | 122606 |
| gi 190570370 ref NC_010928.1 | 3155  | gi 209947788 ref NC_011418.1 | 4669   |
| gi 190015789 ref NC_010927.1 | 23486 | gi 209947645 ref NC_011414.1 | 14787  |
| gi 190570366 ref NC_010926.1 | 5804  | gi 209947580 ref NC_011412.1 | 64753  |
| gi 190570357 ref NC_010923.1 | 8347  | gi 209947514 ref NC_011406.1 | 2520   |
| gi 190570352 ref NC_010922.1 | 3957  | gi 209947511 ref NC_011405.1 | 2348   |
| gi 190570377 ref NC_010917.1 | 4227  | gi 209947505 ref NC_011404.1 | 5002   |
| gi 190571877 ref NC_010915.1 | 6670  | gi 209947495 ref NC_011403.1 | 5501   |
| gi 190571914 ref NC_010914.1 | 2130  | gi 209809836 ref NC_011378.1 | 10226  |
| gi 190571838 ref NC_010913.1 | 5089  | gi 209808771 ref NC_011377.1 | 2631   |

## Supplementary information

|                              |       |                              |        |
|------------------------------|-------|------------------------------|--------|
| gi 190571857 ref NC_010911.1 | 4235  | gi 209808768 ref NC_011376.1 | 2970   |
| gi 190570458 ref NC_010910.1 | 2163  | gi 10956055 ref NC_002059.1  | 2804   |
| gi 190571880 ref NC_010907.1 | 3578  | gi 209529750 ref NC_011363.1 | 1651   |
| gi 190570350 ref NC_010906.1 | 2246  | gi 209401009 ref NC_011352.1 | 36487  |
| gi 190572064 ref NC_010905.1 | 30157 | gi 208730641 ref NC_011336.1 | 4579   |
| gi 190571918 ref NC_010903.1 | 2229  | gi 208730533 ref NC_011332.1 | 4898   |
| gi 190571916 ref NC_010902.1 | 2221  | gi 208703282 ref NC_011342.1 | 29189  |
| gi 190571754 ref NC_010901.1 | 64980 | gi 208703269 ref NC_011341.1 | 10077  |
| gi 190606581 ref NC_010900.1 | 27075 | gi 208703197 ref NC_011340.1 | 11567  |
| gi 190570453 ref NC_010899.1 | 2357  | gi 208701988 ref NC_011338.1 | 3424   |
| gi 190570380 ref NC_010898.1 | 4995  | gi 208701886 ref NC_011337.1 | 72792  |
| gi 190570447 ref NC_010897.1 | 4439  | gi 170650756 ref NC_010487.1 | 3565   |
| gi 190571817 ref NC_010895.1 | 14841 | gi 170650751 ref NC_010486.1 | 4074   |
| gi 190606552 ref NC_010893.1 | 44215 | gi 170650740 ref NC_010485.1 | 8909   |
| gi 190570462 ref NC_010889.1 | 14393 | gi 194442198 ref NC_011079.1 | 3605   |
| gi 190410146 ref NC_010888.1 | 2248  | gi 190571868 ref NC_010894.1 | 3592   |
| gi 190410565 ref NC_010887.1 | 1315  | gi 190015807 ref NC_010860.1 | 32950  |
| gi 190409963 ref NC_010884.1 | 9153  | gi 170783417 ref NC_010499.1 | 6847   |
| gi 190410160 ref NC_010883.1 | 6750  | gi 169646974 ref NC_010421.1 | 34595  |
| gi 190410619 ref NC_010882.1 | 9372  | gi 160431661 ref NC_009982.1 | 39924  |
| gi 190410142 ref NC_010881.1 | 5161  | gi 160431608 ref NC_009980.1 | 61571  |
| gi 190410503 ref NC_010880.1 | 21344 | gi 157326586 ref NC_009807.1 | 10066  |
| gi 190410584 ref NC_010876.1 | 26721 | gi 18466665 ref NC_003385.1  | 106516 |
| gi 190410538 ref NC_010875.1 | 5030  | gi 12084932 ref NC_002638.1  | 49503  |
| gi 190410696 ref NC_010874.1 | 4335  | gi 10956782 ref NC_001848.1  | 4656   |
| gi 190410711 ref NC_010873.1 | 2175  | gi 204309811 ref NC_011266.1 | 1549   |
| gi 190410567 ref NC_010872.1 | 15143 | gi 204309817 ref NC_011228.1 | 6758   |
| gi 190410158 ref NC_010871.1 | 2248  | gi 204309813 ref NC_011227.1 | 4073   |
| gi 190410156 ref NC_010869.1 | 1986  | gi 203288911 ref NC_011265.1 | 27476  |

## Supplementary information

|                              |        |                              |       |
|------------------------------|--------|------------------------------|-------|
| gi 190410154 ref NC_010868.1 | 1986   | gi 203288888 ref NC_011264.1 | 31663 |
| gi 190410150 ref NC_010867.1 | 7318   | gi 203288465 ref NC_011263.1 | 6131  |
| gi 190410480 ref NC_010864.1 | 11661  | gi 203288867 ref NC_011262.1 | 31021 |
| gi 190410704 ref NC_010863.1 | 4359   | gi 203288832 ref NC_011261.1 | 26917 |
| gi 190410633 ref NC_010861.1 | 3680   | gi 203288436 ref NC_011260.1 | 52772 |
| gi 190410497 ref NC_010859.1 | 6710   | gi 203288819 ref NC_011259.1 | 23036 |
| gi 190410550 ref NC_010858.1 | 3724   | gi 203288797 ref NC_011257.1 | 23303 |
| gi 192351862 ref NC_010857.1 | 4896   | gi 203288751 ref NC_011256.1 | 66407 |
| gi 190410148 ref NC_010855.1 | 2251   | gi 203288400 ref NC_011255.1 | 35315 |
| gi 190404491 ref NC_010853.1 | 6823   | gi 203288730 ref NC_011254.1 | 42153 |
| gi 190404501 ref NC_010852.1 | 23290  | gi 203288382 ref NC_011253.1 | 33213 |
| gi 190015895 ref NC_010850.1 | 117252 | gi 203288364 ref NC_011252.1 | 22945 |
| gi 190015861 ref NC_010849.1 | 32759  | gi 203288701 ref NC_011251.1 | 41259 |
| gi 190404536 ref NC_010848.1 | 45519  | gi 203288682 ref NC_011250.1 | 40353 |
| gi 189332428 ref NC_010796.1 | 4241   | gi 203288661 ref NC_011249.1 | 35831 |
| gi 189332434 ref NC_010795.1 | 15079  | gi 203288641 ref NC_011248.1 | 35286 |
| gi 189022213 ref NC_010734.1 | 13415  | gi 203288469 ref NC_011245.1 | 28343 |
| gi 189022202 ref NC_010733.1 | 11237  | gi 203283912 ref NC_011226.1 | 15049 |
| gi 189009161 ref NC_010731.1 | 3306   | gi 203284747 ref NC_011223.1 | 8754  |
| gi 189009205 ref NC_010728.1 | 7185   | gi 198448638 ref NC_011215.1 | 3176  |
| gi 188584601 ref NC_010727.1 | 25164  | gi 198448632 ref NC_011214.1 | 5880  |
| gi 188587525 ref NC_010724.1 | 8689   | gi 198286625 ref NC_011207.1 | 7621  |
| gi 189009159 ref NC_010722.1 | 2140   | gi 194097576 ref NC_011034.1 | 4153  |
| gi 188579259 ref NC_010721.1 | 23392  | gi 164604816 ref NC_010242.1 | 3497  |
| gi 188584627 ref NC_010715.1 | 17207  | gi 51965123 ref NC_006257.1  | 4935  |
| gi 188039002 ref NC_010687.1 | 3011   | gi 197247299 ref NC_011148.1 | 37978 |
| gi 188039005 ref NC_010686.1 | 2412   | gi 116326658 ref NC_008502.1 | 29061 |
| gi 188039008 ref NC_010685.1 | 2473   | gi 115534916 ref NC_008443.1 | 8303  |
| gi 188039011 ref NC_010684.1 | 2531   | gi 9507334 ref NC_001382.1   | 1717  |



## Supplementary information

|                              |        |                              |       |
|------------------------------|--------|------------------------------|-------|
| gi 187930822 ref NC_010683.1 | 80934  | gi 196259856 ref NC_011139.1 | 2197  |
| gi 187921867 ref NC_010679.1 | 121122 | gi 196259853 ref NC_011136.1 | 2066  |
| gi 188219112 ref NC_010675.1 | 4583   | gi 195546299 ref NC_011102.1 | 3432  |
| gi 187918703 ref NC_010672.1 | 7437   | gi 194733896 ref NC_011093.1 | 4585  |
| gi 187734267 ref NC_010659.1 | 5114   | gi 170752179 ref NC_010518.1 | 36410 |
| gi 187729967 ref NC_010657.1 | 33103  | gi 170752137 ref NC_010517.1 | 37743 |
| gi 187729963 ref NC_010656.1 | 2089   | gi 170745566 ref NC_010514.1 | 42985 |
| gi 186686999 ref NC_010633.1 | 65940  | gi 170744977 ref NC_010507.1 | 21022 |
| gi 186686664 ref NC_010630.1 | 123028 | gi 170745634 ref NC_010504.1 | 22114 |
| gi 186686638 ref NC_010629.1 | 26419  | gi 170745610 ref NC_010502.1 | 27836 |
| gi 187729629 ref NC_010626.1 | 2908   | gi 169825392 ref NC_010374.1 | 20019 |
| gi 184199631 ref NC_010621.1 | 14173  | gi 161789270 ref NC_010114.1 | 31036 |
| gi 187729625 ref NC_010616.1 | 2916   | gi 161789109 ref NC_010113.1 | 81413 |
| gi 187729954 ref NC_010615.1 | 3321   | gi 161789205 ref NC_010112.1 | 52527 |
| gi 187736698 ref NC_010608.1 | 38945  | gi 161510924 ref NC_010063.1 | 27041 |
| gi 187736692 ref NC_010607.1 | 4563   | gi 157954006 ref NC_009897.1 | 15286 |
| gi 183219412 ref NC_010603.1 | 12160  | gi 153941546 ref NC_009700.1 | 17531 |
| gi 182682734 ref NC_010579.1 | 38297  | gi 149192721 ref NC_009596.1 | 96210 |
| gi 182676785 ref NC_010578.1 | 66727  | gi 149192647 ref NC_009595.1 | 70305 |
| gi 172055989 ref NC_010555.1 | 36289  | gi 148381586 ref NC_009496.1 | 16344 |
| gi 172059059 ref NC_010550.1 | 1765   | gi 145306741 ref NC_009353.1 | 35803 |
| gi 172059053 ref NC_010549.1 | 4885   | gi 194447301 ref NC_011082.1 | 3373  |
| gi 187729634 ref NC_010540.1 | 20034  | gi 194442162 ref NC_011073.1 | 5594  |
| gi 170783545 ref NC_010492.1 | 49633  | gi 115345712 ref NC_008389.1 | 5824  |
| gi 170079553 ref NC_010480.1 | 124030 | gi 108793632 ref NC_008121.1 | 10777 |
| gi 170079513 ref NC_010479.1 | 38515  | gi 108793532 ref NC_008120.1 | 96471 |
| gi 170079482 ref NC_010478.1 | 31972  | gi 32469825 ref NC_005012.1  | 37468 |
| gi 170079464 ref NC_010477.1 | 16103  | gi 83816857 ref NC_007678.1  | 35505 |
| gi 170079460 ref NC_010476.1 | 4809   | gi 52421214 ref NC_006297.1  | 33716 |

## Supplementary information

|                              |       |                              |        |
|------------------------------|-------|------------------------------|--------|
| gi 170016308 ref NC_010470.1 | 38713 | gi 152963954 ref NC_009660.1 | 12917  |
| gi 170016294 ref NC_010469.1 | 12183 | gi 146351220 ref NC_009453.1 | 112992 |
| gi 170016273 ref NC_010467.1 | 17971 | gi 42632299 ref NC_005244.2  | 101858 |
| gi 170783412 ref NC_010464.1 | 2927  | gi 37595821 ref NC_005128.1  | 48508  |
| gi 170783404 ref NC_010429.1 | 6867  | gi 32456045 ref NC_004943.1  | 3626   |
| gi 170780409 ref NC_010428.1 | 3124  | gi 31790974 ref NC_004834.1  | 29593  |
| gi 170780406 ref NC_010427.1 | 2907  | gi 56973315 ref NC_004721.2  | 15274  |
| gi 170780403 ref NC_010426.1 | 2909  | gi 15081479 ref NC_003042.1  | 54310  |
| gi 169636460 ref NC_010420.1 | 62830 | gi 11496892 ref NC_001857.1  | 53561  |
| gi 169302998 ref NC_010378.1 | 51602 | gi 11496779 ref NC_001855.1  | 36849  |
| gi 169825329 ref NC_010373.1 | 57951 | gi 11496735 ref NC_001854.1  | 27323  |
| gi 169302939 ref NC_010372.1 | 18634 | gi 11496697 ref NC_001853.1  | 28601  |
| gi 170783434 ref NC_010370.1 | 15665 | gi 11496607 ref NC_001850.1  | 24177  |
| gi 167626220 ref NC_010331.1 | 3936  | gi 45478711 ref NC_005816.1  | 9609   |
| gi 167643919 ref NC_010330.1 | 6038  | gi 45478588 ref NC_005815.1  | 106642 |
| gi 167046789 ref NC_010312.1 | 4235  | gi 45476499 ref NC_005814.1  | 21742  |
| gi 167077111 ref NC_010310.1 | 15135 | gi 170780457 ref NC_010423.1 | 4962   |
| gi 167046792 ref NC_010309.1 | 10820 | gi 169544160 ref NC_010375.1 | 5031   |
| gi 166163605 ref NC_010291.1 | 4147  | gi 38261095 ref NC_005206.1  | 9304   |
| gi 166163601 ref NC_010290.1 | 3175  | gi 32470338 ref NC_005026.1  | 2747   |
| gi 166091528 ref NC_010286.1 | 7500  | gi 32470438 ref NC_005010.1  | 9328   |
| gi 166153431 ref NC_010285.1 | 7499  | gi 32470132 ref NC_005002.1  | 1983   |
| gi 166153459 ref NC_010284.1 | 4441  | gi 32470458 ref NC_005000.1  | 24873  |
| gi 166091552 ref NC_010283.1 | 55712 | gi 32455506 ref NC_004944.1  | 10877  |
| gi 166091537 ref NC_010282.1 | 12459 | gi 32455491 ref NC_004932.1  | 7607   |
| gi 166153463 ref NC_010281.1 | 12095 | gi 32453477 ref NC_004922.1  | 5670   |
| gi 165975441 ref NC_010262.1 | 4442  | gi 27764606 ref NC_004535.1  | 19218  |
| gi 165975452 ref NC_010260.1 | 3043  | gi 27764592 ref NC_004533.1  | 4603   |
| gi 165905640 ref NC_010258.1 | 39281 | gi 19718328 ref NC_003457.1  | 5269   |

## Supplementary information

|                              |        |                              |       |
|------------------------------|--------|------------------------------|-------|
| gi 165975395 ref NC_010257.1 | 32014  | gi 19718320 ref NC_003455.1  | 4301  |
| gi 164604819 ref NC_010243.1 | 4447   | gi 10956574 ref NC_002522.1  | 7610  |
| gi 164564304 ref NC_010231.1 | 3332   | gi 41057060 ref NC_005326.1  | 6830  |
| gi 164564308 ref NC_010230.1 | 3041   | gi 32455568 ref NC_004933.1  | 50410 |
| gi 163937941 ref NC_010183.1 | 52830  | gi 190571860 ref NC_010920.1 | 3319  |
| gi 163937865 ref NC_010182.1 | 64977  | gi 190571872 ref NC_010918.1 | 3773  |
| gi 163943459 ref NC_010181.1 | 75107  | gi 190570473 ref NC_010912.1 | 5047  |
| gi 163932140 ref NC_010177.1 | 2452   | gi 190571831 ref NC_010909.1 | 6220  |
| gi 162417821 ref NC_010158.1 | 114570 | gi 190571849 ref NC_010908.1 | 2111  |
| gi 161789063 ref NC_010115.1 | 37317  | gi 190572081 ref NC_010890.1 | 5015  |
| gi 161722691 ref NC_010099.1 | 1641   | gi 190410714 ref NC_010878.1 | 21248 |
| gi 161598669 ref NC_010078.1 | 1490   | gi 190410560 ref NC_010856.1 | 3635  |
| gi 161598491 ref NC_010077.1 | 34986  | gi 190410555 ref NC_010854.1 | 3607  |
| gi 161376708 ref NC_010009.1 | 9097   | gi 190570387 ref NC_010904.1 | 4715  |
| gi 161353806 ref NC_010008.1 | 5428   | gi 190410166 ref NC_010885.1 | 4072  |
| gi 160873002 ref NC_009999.1 | 75508  | gi 190410543 ref NC_010877.1 | 4815  |
| gi 160872934 ref NC_009998.1 | 75605  | gi 109150018 ref NC_008154.1 | 7011  |
| gi 159901742 ref NC_009974.1 | 99204  | gi 109150015 ref NC_008153.1 | 2745  |
| gi 158341621 ref NC_009934.1 | 2133   | gi 81330540 ref NC_007593.1  | 5558  |
| gi 157362818 ref NC_009829.1 | 46804  | gi 58616723 ref NC_006821.1  | 6700  |
| gi 157149612 ref NC_009796.1 | 16457  | gi 49176958 ref NC_005910.1  | 5113  |
| gi 157149578 ref NC_009795.1 | 30949  | gi 18875439 ref NC_003411.1  | 5621  |
| gi 157149316 ref NC_009794.1 | 5601   | gi 15743558 ref NC_003114.1  | 3172  |
| gi 157149300 ref NC_009793.1 | 9294   | gi 15320547 ref NC_003079.1  | 4091  |
| gi 156978327 ref NC_009781.1 | 5146   | gi 11968208 ref NC_002630.1  | 36804 |
| gi 156936674 ref NC_009777.1 | 89008  | gi 29611500 ref NC_004703.1  | 33038 |
| gi 156530458 ref NC_009753.1 | 31999  | gi 32128473 ref NC_004900.1  | 4970  |
| gi 154263796 ref NC_009716.1 | 6511   | gi 19718324 ref NC_003456.1  | 4245  |
| gi 154147860 ref NC_009713.1 | 3678   | gi 32470588 ref NC_005008.1  | 4439  |

## Supplementary information

|                              |        |                              |        |
|------------------------------|--------|------------------------------|--------|
| gi 153971488 ref NC_009701.1 | 68446  | gi 32470581 ref NC_005007.1  | 4679   |
| gi 162957994 ref NC_009666.2 | 3320   | gi 32470572 ref NC_005006.1  | 8007   |
| gi 152998483 ref NC_009661.1 | 83224  | gi 32470520 ref NC_005003.1  | 6585   |
| gi 152973836 ref NC_009653.1 | 3478   | gi 51247073 ref NC_006140.1  | 14664  |
| gi 152973830 ref NC_009652.1 | 4259   | gi 32455412 ref NC_004990.1  | 7835   |
| gi 150406443 ref NC_009625.1 | 4065   | gi 56968324 ref NC_002489.3  | 1286   |
| gi 150406540 ref NC_009624.1 | 13425  | gi 77102894 ref NC_006629.2  | 4440   |
| gi 150406526 ref NC_009623.1 | 9549   | gi 58038486 ref NC_006676.1  | 2687   |
| gi 150375692 ref NC_009619.1 | 30429  | gi 51038624 ref NC_006129.1  | 55560  |
| gi 148641539 ref NC_009517.1 | 2117   | gi 161561737 ref NC_010088.1 | 12041  |
| gi 148641524 ref NC_009516.1 | 13956  | gi 289594273 ref NC_013925.1 | 58487  |
| gi 148557803 ref NC_009506.1 | 11934  | gi 113956651 ref NC_008318.1 | 15723  |
| gi 148244139 ref NC_009477.1 | 30429  | gi 64204361 ref NC_006996.1  | 1668   |
| gi 148244133 ref NC_009474.1 | 4909   | gi 83743429 ref NC_006426.2  | 3463   |
| gi 148244127 ref NC_009473.1 | 5629   | gi 289193301 ref NC_013888.1 | 12197  |
| gi 148244117 ref NC_009472.1 | 8781   | gi 288551486 ref NC_013777.1 | 5740   |
| gi 148244088 ref NC_009471.1 | 37155  | gi 27753932 ref NC_004531.1  | 3918   |
| gi 148244055 ref NC_009470.1 | 37415  | gi 284807103 ref NC_013770.1 | 26615  |
| gi 146322225 ref NC_009435.1 | 68319  | gi 284176391 ref NC_013749.1 | 15815  |
| gi 146280384 ref NC_009433.1 | 13873  | gi 284176293 ref NC_013748.1 | 71062  |
| gi 146280352 ref NC_009432.1 | 36198  | gi 284162948 ref NC_013742.1 | 2801   |
| gi 146280242 ref NC_009431.1 | 121962 | gi 270208374 ref NC_013536.1 | 2272   |
| gi 145597192 ref NC_009378.1 | 137010 | gi 228288719 ref NC_012624.1 | 42245  |
| gi 145597103 ref NC_009377.1 | 71507  | gi 261403873 ref NC_013409.1 | 4704   |
| gi 145308075 ref NC_009351.1 | 7941   | gi 261403859 ref NC_013408.1 | 10704  |
| gi 145294040 ref NC_009347.1 | 2101   | gi 257070363 ref NC_013177.1 | 20534  |
| gi 145294031 ref NC_009346.1 | 5153   | gi 256811520 ref NC_013157.1 | 22190  |
| gi 145294025 ref NC_009345.1 | 8401   | gi 169237313 ref NC_010367.1 | 40894  |
| gi 145226197 ref NC_009341.1 | 16660  | gi 169237160 ref NC_010366.1 | 147625 |

## Supplementary information

|                              |        |                              |        |
|------------------------------|--------|------------------------------|--------|
| gi 145226172 ref NC_009340.1 | 25309  | gi 251781461 ref NC_012890.1 | 2802   |
| gi 134287794 ref NC_009228.1 | 107231 | gi 55376280 ref NC_006393.1  | 132678 |
| gi 134287418 ref NC_009226.1 | 88096  | gi 55376228 ref NC_006392.1  | 50060  |
| gi 133757033 ref NC_009130.1 | 51514  | gi 55376187 ref NC_006391.1  | 39521  |
| gi 133757362 ref NC_009129.1 | 29854  | gi 55376144 ref NC_006390.1  | 33452  |
| gi 126090338 ref NC_009038.1 | 7995   | gi 55376107 ref NC_006389.1  | 33303  |
| gi 126090236 ref NC_009036.1 | 74000  | gi 10954572 ref NC_000905.1  | 6205   |
| gi 125654693 ref NC_009008.1 | 37100  | gi 169658269 ref NC_010365.1 | 6970   |
| gi 125654605 ref NC_009007.1 | 114045 | gi 119709757 ref NC_008696.1 | 31504  |
| gi 122894065 ref NC_008792.1 | 12207  | gi 10954591 ref NC_002121.1  | 1736   |
| gi 121583590 ref NC_008771.1 | 31194  | gi 10954552 ref NC_001773.1  | 3444   |
| gi 121582466 ref NC_008765.1 | 72689  | gi 49188480 ref NC_005907.1  | 4967   |
| gi 119633060 ref NC_008690.1 | 7847   | gi 187729798 ref NC_010598.1 | 25960  |
| gi 117621834 ref NC_008569.1 | 24794  | gi 187729751 ref NC_010597.1 | 29000  |
| gi 117621799 ref NC_008568.1 | 28533  | gi 161598660 ref NC_010011.1 | 5705   |
| gi 117621743 ref NC_008567.1 | 32368  | gi 153012335 ref NC_009658.1 | 3619   |
| gi 117621706 ref NC_008566.1 | 34273  | gi 134046898 ref NC_009136.1 | 8285   |
| gi 117621646 ref NC_008565.1 | 59804  | gi 109644367 ref NC_008213.1 | 46867  |
| gi 117621570 ref NC_008564.1 | 59958  | gi 73663826 ref NC_007349.1  | 36358  |
| gi 116326684 ref NC_008501.1 | 3361   | gi 62464800 ref NC_006906.1  | 9689   |
| gi 116326679 ref NC_008500.1 | 4449   | gi 56121822 ref NC_006493.1  | 41229  |
| gi 115534802 ref NC_008445.1 | 50237  | gi 55701229 ref NC_006425.1  | 35422  |
| gi 115534860 ref NC_008442.1 | 44010  | gi 55701227 ref NC_006424.1  | 26476  |
| gi 115534309 ref NC_008441.1 | 15397  | gi 55701186 ref NC_006423.1  | 26200  |
| gi 115534295 ref NC_008440.1 | 6361   | gi 55701144 ref NC_006422.1  | 28930  |
| gi 115345694 ref NC_008388.1 | 16575  | gi 50198901 ref NC_005969.1  | 20417  |
| gi 115345636 ref NC_008387.1 | 69269  | gi 42761454 ref NC_005563.1  | 2158   |
| gi 111074074 ref NC_008273.1 | 30017  | gi 42761460 ref NC_005562.1  | 7598   |
| gi 110804009 ref NC_008264.1 | 12206  | gi 38640509 ref NC_005239.1  | 2538   |

Supplementary information

|                              |       |                              |        |
|------------------------------|-------|------------------------------|--------|
| gi 110803998 ref NC_008263.1 | 12397 | gi 31983835 ref NC_004853.1  | 7830   |
| gi 110666895 ref NC_008246.1 | 5182  | gi 31983796 ref NC_004852.1  | 24554  |
| gi 109948253 ref NC_008230.1 | 3661  | gi 15004882 ref NC_003026.1  | 3373   |
| gi 108564598 ref NC_008087.1 | 9370  | gi 10954595 ref NC_002125.1  | 4439   |
| gi 94972373 ref NC_008013.1  | 39794 | gi 10954593 ref NC_002124.1  | 1765   |
| gi 94972343 ref NC_008012.1  | 27048 | gi 10954584 ref NC_002101.1  | 6959   |
| gi 93004786 ref NC_007968.1  | 41221 | gi 10954579 ref NC_002097.1  | 5467   |
| gi 92429516 ref NC_007962.1  | 3828  | gi 10954553 ref NC_001811.1  | 8285   |
| gi 89898813 ref NC_007900.1  | 7552  | gi 10954545 ref NC_001771.1  | 5350   |
| gi 85057971 ref NC_007720.1  | 4316  | gi 10954476 ref NC_001337.1  | 11014  |
| gi 85057963 ref NC_007719.1  | 5104  | gi 10954462 ref NC_001336.1  | 13514  |
| gi 85057958 ref NC_007718.1  | 4009  | gi 76803367 ref NC_007427.1  | 130989 |
| gi 85057952 ref NC_007717.1  | 3972  | gi 76803317 ref NC_007428.1  | 23486  |
| gi 16356922 ref NC_003158.1  | 16341 | gi 207258116 ref NC_011299.1 | 28649  |

**Supplementary Table S11.** List of full REP\_AC names used for phylogenetic assignment.

| Contig or plasmid | Source | GenBank Accession | Species                                           |
|-------------------|--------|-------------------|---------------------------------------------------|
| M_c01             | Morges |                   |                                                   |
| M_c02             | Morges |                   |                                                   |
| M_c03             | Morges |                   |                                                   |
| M_c10             | Morges |                   |                                                   |
| M_c11             | Morges |                   |                                                   |
| M_c12             | Morges |                   |                                                   |
| M_c14             | Morges |                   |                                                   |
| M_c17             | Morges |                   |                                                   |
| M_c18             | Morges |                   |                                                   |
| M_c19             | Morges |                   |                                                   |
| M_c1904           | Morges |                   |                                                   |
| M_c22             | Morges |                   |                                                   |
| M_c226            | Morges |                   |                                                   |
| M_c278            | Morges |                   |                                                   |
| M_C3061           | Morges |                   |                                                   |
| M_c31             | Morges |                   |                                                   |
| M_c34             | Morges |                   |                                                   |
| M_c35             | Morges |                   |                                                   |
| M_c36             | Morges |                   |                                                   |
| M_c407            | Morges |                   |                                                   |
| M_c48             | Morges |                   |                                                   |
| M_c519            | Morges |                   |                                                   |
| M_c52             | Morges |                   |                                                   |
| M_c53             | Morges |                   |                                                   |
| M_c55             | Morges |                   |                                                   |
| M_c57             | Morges |                   |                                                   |
| M_c596            | Morges |                   |                                                   |
| M_c711            | Morges |                   |                                                   |
| M_c81             | Morges |                   |                                                   |
| V_c02227          | Visp   |                   |                                                   |
| V_c02897          | Visp   |                   |                                                   |
| V_c02909          | Visp   |                   |                                                   |
| V_c03015          | Visp   |                   |                                                   |
| CHR_              |        | YP_002442095.1    | [ <i>Pseudomonas aeruginosa</i> LESB58]           |
| CHR_GEI_SGI1-V    |        | AED98694.1        | [ <i>Proteus mirabilis</i> ]                      |
| CHR               |        | EGQ98804.1        | [ <i>Vibrio cholerae</i> HE39]                    |
| CHR               |        | YP_001641356.1    | [ <i>Methylobacterium extorquens</i> PA1]         |
| CHR               |        | YP_001754236.1    | [ <i>Methylobacterium radiotolerans</i> JCM 2831] |
| CHR               |        | YP_004011810.1    | [ <i>Rhodomicrobium vannielii</i> ATCC 17100]     |
| CHR               |        | YP_004129265.1    | [ <i>Taylorella equigenitalis</i> MCE9]           |

|                     |  |                |                                             |
|---------------------|--|----------------|---------------------------------------------|
| CHR                 |  | YP_004302329.1 | [Polymorphum gilvum SL003B-26A1]            |
| CHR                 |  | YP_109866.1    | [Burkholderia pseudomallei K96243]          |
| CHR                 |  | YP_584967.1    | [Cupriavidus metallidurans CH34]            |
| CHR                 |  | YP_965444.1    | [Shewanella sp. W3-18-1]                    |
| CHR                 |  | YP_968773.1    | [Acidovorax citrulli AAC00-1]               |
| CHR2                |  | YP_001796446.1 | [Cupriavidus taiwanensis LMG 19424]         |
| cntg_1104196056139  |  | ZP_01974633.1  | [Vibrio cholerae B33]                       |
| cntg_11679kb        |  | EGR08494.1     | [Vibrio cholerae HE48]                      |
| cntg_247            |  | ZP_00682678.1  | [Xylella fastidiosa Ann-1]                  |
| cntg                |  | ZP_02413388.1  | [Burkholderia pseudomallei 14]              |
| cntg00242           |  | EGO80808.1     | [Xylella fastidiosa EB92.1]                 |
| cntg00243           |  | ZP_06895960.1  | [Roseomonas cervicalis ATCC 49957]          |
| cntg01383           |  | ZP_08870552.1  | [Azospirillum amazonense Y2]                |
| cntg99              |  | ZP_05880298.1  | [Vibrio furnissii CIP 102972]               |
| cntgNZ_ABBK01000836 |  | ZP_02449509.1  | [Burkholderia pseudomallei 91]              |
| cntgPP100942        |  | ZP_08124617.1  | [Pseudonocardia sp. P1]                     |
| megaplasmid         |  | YP_003749016.1 | [Ralstonia solanacearum PSI07]              |
| megaplasmid         |  | YP_587945.1    | [Cupriavidus metallidurans CH34]            |
| OUT_RepA_C          |  | EIJ25216.1     | [Bifidobacterium longum subsp. longum 2-2B] |
| pAB510e             |  | YP_003452890.1 | [Azospirillum sp. B510]                     |
| pACMV1              |  | YP_004277221.1 | [Acidiphilium multivorum AIU301]            |
| pAG1                |  | YP_001965988.1 | [Xanthomonas axonopodis pv. glycines]       |
| pAPA01-020          |  | YP_003189510.1 | [Acetobacter pasteurianus IFO 3283-01]      |
| pBFp1               |  | AAQ94182.1     | [uncultured bacterium]                      |
| pBGLA_1p            |  | YP_004362442.1 | [Burkholderia gladioli BSR3]                |
| pBGLA_3p            |  | YP_004351116.1 | [Burkholderia gladioli BSR3]                |
| pBGLU_4p            |  |                | YP_002913205.1                              |
| pBI1063             |  | AAP82047.1     | [Stenotrophomonas maltophilia] aa           |
| pCRY                |  | AAO18205.1     | RepA [Corynebacterium glutamicum]           |
| pGLOV01             |  | YP_001953900.1 | [Geobacter lovleyi SZ]                      |
| pGOX2               |  | YP_190413.1    | [Gluconobacter oxydans 621H]                |
| pGXY020             |  | YP_004857926.1 | [Gluconacetobacter xylinus NBRC 3288]       |
| pHALHY02            |  | YP_004451395.1 | [Haliscomenobacter hydrossis DSM 1100]      |
| pHLHK22             |  | YP_001691017.1 | [Laribacter hongkongensis]                  |
| pIPO2T              |  | NP_444546.1    | [uncultured bacterium]                      |
| pKLC102             |  | AAP22621.1     | [Pseudomonas aeruginosa C]                  |
| plasmid_            |  | YP_380325.1    | [Geobacter metallireducens GS-15]           |
| plasmid_4           |  | YP_004210585.1 | [Acidobacterium sp. MP5ACTX9]               |
| plasmid2            |  | YP_004219735.1 | [Granulicella tundricola MP5ACTX9]          |
| plasmid90kDa        |  | CAB88201.1     | [Azospirillum brasilense]                   |
| pLAtc2              |  | YP_004750509.1 | [Acidithiobacillus caldus SM-1]             |
| pMG101              |  | BAA89406.1     | [Rhodopseudomonas palustris]                |
| pMOL98              |  | ACT97177.1     | [Synthetic plasmid pMOL98]                  |
| pMRAD02             |  | YP_001766469.1 | [Methylobacterium radiotolerans JCM 2831]   |



|              |  |                |                                                     |
|--------------|--|----------------|-----------------------------------------------------|
| pPAES01      |  | YP_002019746.1 | [Prosthecochloris aestuarii DSM 271]                |
| pPRO2        |  | YP_899682.1    | [Pelobacter propionicus DSM 2379]                   |
| pR7K         |  | YP_001874895.1 | [Providencia rettgeri]                              |
| pRM21        |  | NP_044344.1    | [Rhodothermus marinus]                              |
| pRMAR01      |  | YP_003292130.1 | [Rhodothermus marinus DSM 4252]                     |
| pRSC35       |  | CBJ36157.1     | [Ralstonia solanacearum CMR15]                      |
| pSB102       |  | NP_361015.1    | [uncultured bacterium]                              |
| pSLIN03      |  | YP_003391749.1 | [Spirosoma linguale DSM 74]                         |
| pSM103mini   |  | YP_003858293.1 | [Sphingopyxis macrogoltabida]                       |
| pTer331_01   |  | YP_001672027.1 | [Collimonas fungivorans]                            |
| pUnnamed54kb |  | YP_425065.1    | [Rhodospirillum rubrum ATCC 11170]                  |
| pXAC64       |  | NP_644784.1    | [Xanthomonas axonopodis pv. citri str. 306]         |
| pXap41       |  | YP_004888046.1 | [Xanthomonas arboricola CFBP 5530]                  |
| pXCV183      |  | YP_361657.1    | [Xanthomonas campestris pv. vesicatoria str. 85-10] |
| pXV2         |  | AF201825_1     | [Xanthomonas euvesicatoria]                         |
